# Supplementary material
Source: HighWire-hosted journal article supplement (https://erj.ersjournals.com/content/59/6/2101404)
Supplement: inline-supplementary-material-1 [file inline-supplementary-material-1.pdf]

## On line Table S1: Final Search Strategy – Pediatric CPAP and NIV

Search date: September 29, 2019

Databases searched: Ovid MEDLINE(R), Embase, Wiley Cochrane; CINAHL, Child Development & Adolescent Health

Limits: Human, Children (0 – 18), English, 2016 to current

Excluded: Conference abstracts, letters, notes comments editorials, case reports

*Note: This search was conducted from 2016 onwards to capture articles published since the last update of the systematic search used for the following article: [Sleep Med Rev.](#) 2018 Feb;37:148-158. doi: 10.1016/j.smrv.2017.02.005. Epub 2017 Mar 2. The search strategy in this scoping review was not duplicated, as we focused on only CPAP and NIV.*

Ovid MEDLINE: Epub Ahead of Print, In-Process & Other Non-Indexed Citations, Ovid MEDLINE® Daily and Ovid MEDLINE® 1946-Present, Embase Classic+Embase 1947 to 2019 September 27

Ovid MEDLINE(R), Embase

| #  | Searches                                                                                                                                                                        | Results  |
|----|---------------------------------------------------------------------------------------------------------------------------------------------------------------------------------|----------|
| 1  | exp Continuous Positive Airway Pressure/ use ppez                                                                                                                               | 6624     |
| 2  | exp positive end expiratory pressure/ use emczd                                                                                                                                 | 54343    |
| 3  | (cpap or ncpap or continuous positive airway pressure or aprv or airway pressure release ventilation*).ti,ab,kf,kw.                                                             | 32750    |
| 4  | exp Noninvasive Ventilation/                                                                                                                                                    | 10445    |
| 5  | ((ventilat* or respirat*) adj2 (non-invasive or noninvasive)).ti,ab,kf,kw.                                                                                                      | 18860    |
| 6  | (NIV or NPPV or NIPPV or NIAV).ti,ab,kf,kw.                                                                                                                                     | 11407    |
| 7  | or/1-6                                                                                                                                                                          | 91100    |
| 8  | exp adolescent/ or exp child/ or exp infant/ use ppez or exp adolescence/ use emczd or exp childhood disease/ use emczd or exp infant disease/ use emczd                        | 8258030  |
| 9  | (adoles* or teen* or boy* or girl* or minor or minors or puberty* or pubescen* or pediatric* or paediatric* or kindergar* or highschool*).ab,ti,kf,kw.                          | 2459217  |
| 10 | (infant* or infancy or newborn* or baby* or babies or child* or schoolchild* or school age or school ages or school aged or preschool* or kid or kids or toddler*).ab,ti,kf,kw. | 4209639  |
| 11 | (pediatric* or paediatric* or infan* or child* or adolescen* or young).jn,jw. or (pediatric* or paediatric* or infan* or child* or adolescen* or young).in.                     | 3625222  |
| 12 | exp Minors/ or exp Pediatrics/                                                                                                                                                  | 173721   |
| 13 | or/8-12                                                                                                                                                                         | 11047742 |
| 14 | 7 and 13                                                                                                                                                                        | 25564    |
| 15 | animals/ not (humans/ and animals/)                                                                                                                                             | 5967853  |
| 16 | 14 not 15                                                                                                                                                                       | 25428    |

|    |                                                                                                                                                                                                                                                              |         |
|----|--------------------------------------------------------------------------------------------------------------------------------------------------------------------------------------------------------------------------------------------------------------|---------|
| 17 | limit 16 to english language                                                                                                                                                                                                                                 | 23370   |
| 18 | limit 17 to yr="2016 -Current"                                                                                                                                                                                                                               | 7387    |
| 19 | limit 18 to (case reports or comment or congress or editorial or letter or conference abstract or note) [Limit not valid in Ovid MEDLINE(R),Ovid MEDLINE(R) Daily Update,Ovid MEDLINE(R) In-Process,Ovid MEDLINE(R) Publisher,Embase; records were retained] | 2378    |
| 20 | Case Report/                                                                                                                                                                                                                                                 | 4556630 |
| 21 | 18 not (19 or 20)                                                                                                                                                                                                                                            | 4009    |
| 22 | remove duplicates from 21                                                                                                                                                                                                                                    | 2873    |

## Wiley Cochrane

|     |                                                                                                                                                                          |        |
|-----|--------------------------------------------------------------------------------------------------------------------------------------------------------------------------|--------|
| #1  | MeSH descriptor: [Continuous Positive Airway Pressure] explode all trees                                                                                                 | 982    |
| #2  | (cpap or ncpap or continuous positive airway pressure or aprv or airway pressure release ventilation*):ti,ab                                                             | 5116   |
| #3  | MeSH descriptor: [Noninvasive Ventilation] explode all trees                                                                                                             | 196    |
| #4  | ((ventilat* or respirat*) NEAR/2 (non-invasive or noninvasive)):ti,ab                                                                                                    | 2070   |
| #5  | (NIV or NPPV or NIPPV or NIAV):ti,ab                                                                                                                                     | 1378   |
| #6  | #1 or #2 or #3 or #4 or #5                                                                                                                                               | 7183   |
| #7  | MeSH descriptor: [Minors] explode all trees                                                                                                                              | 8      |
| #8  | MeSH descriptor: [Child] explode all trees                                                                                                                               | 1198   |
| #9  | MeSH descriptor: [Infant] explode all trees                                                                                                                              | 15492  |
| #10 | MeSH descriptor: [Adolescent] explode all trees                                                                                                                          | 100701 |
| #11 | (adoles* or teen* or boy* or girl* or minor or minors or puberty* or pubescen* or pediatric* or paediatric* or kindergar* or highschool*):ab,ti                          | 73364  |
| #12 | (infant* or infancy or newborn* or baby* or babies or child* or schoolchild* or school age or school ages or school aged or preschool* or kid or kids or toddler*):ab,ti | 151625 |
| #13 | #7 or #8 or #9 or #10 or #11 or #12                                                                                                                                      | 266932 |
| #14 | #6 and #13 with Cochrane Library publication date Between Jan 2016 and Dec 2019                                                                                          | 1033   |

## CINAHL Plus

| #   | Query      | Limiters/Expanders                                                                                                                                      | Last Run Via                                                                                             | Results |
|-----|------------|---------------------------------------------------------------------------------------------------------------------------------------------------------|----------------------------------------------------------------------------------------------------------|---------|
| S18 | S9 AND S15 | Limiters - Published Date: 20160101-20191231<br>Expanders - Apply equivalent subjects<br>Narrow by Language: - english<br>Search modes - Boolean/Phrase | Interface - EBSCOhost<br>Research Databases<br>Search Screen - Advanced Search<br>Database - CINAHL Plus | 657     |

|     |                                                                                                                                                                       |                                                                                                                        |                                                                                                                         |         |
|-----|-----------------------------------------------------------------------------------------------------------------------------------------------------------------------|------------------------------------------------------------------------------------------------------------------------|-------------------------------------------------------------------------------------------------------------------------|---------|
|     |                                                                                                                                                                       |                                                                                                                        | with Full Text                                                                                                          |         |
| S17 | S9 AND S15                                                                                                                                                            | Limiters - Published Date: 20160101-20191231<br>Expanders - Apply equivalent subjects<br>Search modes - Boolean/Phrase | Interface - EBSCOhost<br>Research Databases<br>Search Screen - Advanced Search<br>Database - CINAHL Plus with Full Text | 669     |
| S16 | S9 AND S15                                                                                                                                                            | Expanders - Apply equivalent subjects<br>Search modes - Boolean/Phrase                                                 | Interface - EBSCOhost<br>Research Databases<br>Search Screen - Advanced Search<br>Database - CINAHL Plus with Full Text | 1,929   |
| S15 | S10 OR S11 OR S12 OR S13 OR S14                                                                                                                                       | Expanders - Apply equivalent subjects<br>Search modes - Boolean/Phrase                                                 | Interface - EBSCOhost<br>Research Databases<br>Search Screen - Advanced Search<br>Database - CINAHL Plus with Full Text | 849,991 |
| S14 | AB (infant* or infancy or newborn* or baby* or babies or child* or schoolchild* or school age or school ages or school aged or preschool* or kid or kids or toddler*) | Expanders - Apply equivalent subjects<br>Search modes - Boolean/Phrase                                                 | Interface - EBSCOhost<br>Research Databases<br>Search Screen - Advanced Search<br>Database - CINAHL Plus with Full Text | 371,352 |
| S13 | TI (infant* or infancy or newborn* or baby* or babies or child* or schoolchild* or school age or school ages or school aged or preschool* or kid or kids or toddler*) | Expanders - Apply equivalent subjects<br>Search modes - Boolean/Phrase                                                 | Interface - EBSCOhost<br>Research Databases<br>Search Screen - Advanced Search<br>Database - CINAHL Plus with Full Text | 327,023 |
| S12 | AB (adoles* or teen* or boy* or girl* or                                                                                                                              | Expanders - Apply                                                                                                      | Interface -                                                                                                             | 215,329 |

|     |                                                                                                                                              |                                                                              |                                                                                                                                        |         |
|-----|----------------------------------------------------------------------------------------------------------------------------------------------|------------------------------------------------------------------------------|----------------------------------------------------------------------------------------------------------------------------------------|---------|
|     | minor or minors or puberty* or pubescen* or pediatric* or paediatric* or kindergar* or highschool*)                                          | equivalent subjects<br>Search modes -<br>Boolean/Phrase                      | EBSCOhost<br>Research<br>Databases<br>Search Screen -<br>Advanced Search<br>Database -<br>CINAHL Plus<br>with Full Text                |         |
| S11 | TI (adoles* or teen* or boy* or girl* or minor or minors or puberty* or pubescen* or pediatric* or paediatric* or kindergar* or highschool*) | Expanders - Apply<br>equivalent subjects<br>Search modes -<br>Boolean/Phrase | Interface -<br>EBSCOhost<br>Research<br>Databases<br>Search Screen -<br>Advanced Search<br>Database -<br>CINAHL Plus<br>with Full Text | 171,403 |
| S10 | MH child OR MH infant OR MH adolescent OR MH minors OR MH pediatrics                                                                         | Expanders - Apply<br>equivalent subjects<br>Search modes -<br>Boolean/Phrase | Interface -<br>EBSCOhost<br>Research<br>Databases<br>Search Screen -<br>Advanced Search<br>Database -<br>CINAHL Plus<br>with Full Text | 489,951 |
| S9  | S1 OR S2 OR S3 OR S4 OR S5 OR S6 OR S7 OR S8                                                                                                 | Expanders - Apply<br>equivalent subjects<br>Search modes -<br>Boolean/Phrase | Interface -<br>EBSCOhost<br>Research<br>Databases<br>Search Screen -<br>Advanced Search<br>Database -<br>CINAHL Plus<br>with Full Text | 9,028   |
| S8  | AB (NIV or NPPV or NIPPV or NIAV)                                                                                                            | Expanders - Apply<br>equivalent subjects<br>Search modes -<br>Boolean/Phrase | Interface -<br>EBSCOhost<br>Research<br>Databases<br>Search Screen -<br>Advanced Search<br>Database -<br>CINAHL Plus<br>with Full Text | 1,095   |
| S7  | TI (NIV or NPPV or NIPPV or NIAV)                                                                                                            | Expanders - Apply<br>equivalent subjects<br>Search modes -<br>Boolean/Phrase | Interface -<br>EBSCOhost<br>Research<br>Databases                                                                                      | 118     |

|    |                                                                                                          |                                                                              |                                                                                                                                        |       |
|----|----------------------------------------------------------------------------------------------------------|------------------------------------------------------------------------------|----------------------------------------------------------------------------------------------------------------------------------------|-------|
|    |                                                                                                          |                                                                              | Search Screen -<br>Advanced Search<br>Database -<br>CINAHL Plus<br>with Full Text                                                      |       |
| S6 | AB ((ventilat* or respirat*) N2 (non-invasive or noninvasive))                                           | Expanders - Apply<br>equivalent subjects<br>Search modes -<br>Boolean/Phrase | Interface -<br>EBSCOhost<br>Research<br>Databases<br>Search Screen -<br>Advanced Search<br>Database -<br>CINAHL Plus<br>with Full Text | 2,363 |
| S5 | TI ((ventilat* or respirat*) N2 (non-invasive or noninvasive))                                           | Expanders - Apply<br>equivalent subjects<br>Search modes -<br>Boolean/Phrase | Interface -<br>EBSCOhost<br>Research<br>Databases<br>Search Screen -<br>Advanced Search<br>Database -<br>CINAHL Plus<br>with Full Text | 1,870 |
| S4 | MH Noninvasive Ventilation                                                                               | Expanders - Apply<br>equivalent subjects<br>Search modes -<br>Boolean/Phrase | Interface -<br>EBSCOhost<br>Research<br>Databases<br>Search Screen -<br>Advanced Search<br>Database -<br>CINAHL Plus<br>with Full Text | 0     |
| S3 | AB cpap or ncpap or continuous positive airway pressure or aprv or airway pressure release ventilation*) | Expanders - Apply<br>equivalent subjects<br>Search modes -<br>Boolean/Phrase | Interface -<br>EBSCOhost<br>Research<br>Databases<br>Search Screen -<br>Advanced Search<br>Database -<br>CINAHL Plus<br>with Full Text | 3,127 |
| S2 | TI cpap or ncpap or continuous positive airway pressure or aprv or airway pressure release ventilation*) | Expanders - Apply<br>equivalent subjects<br>Search modes -<br>Boolean/Phrase | Interface -<br>EBSCOhost<br>Research<br>Databases<br>Search Screen -<br>Advanced Search<br>Database -                                  | 2,234 |

|    |                                        |                                                                              |                                                                                                                                        |       |
|----|----------------------------------------|------------------------------------------------------------------------------|----------------------------------------------------------------------------------------------------------------------------------------|-------|
|    |                                        |                                                                              | CINAHL Plus<br>with Full Text                                                                                                          |       |
| S1 | MH Continuous Positive Airway Pressure | Expanders - Apply<br>equivalent subjects<br>Search modes -<br>Boolean/Phrase | Interface -<br>EBSCOhost<br>Research<br>Databases<br>Search Screen -<br>Advanced Search<br>Database -<br>CINAHL Plus<br>with Full Text | 4,738 |

## Child Development & Adolescent Studies

| #  | Query                                                                                                     | Limiters/Expanders                                                                                                       | Last Run Via                                                                                                                        | Results |
|----|-----------------------------------------------------------------------------------------------------------|--------------------------------------------------------------------------------------------------------------------------|-------------------------------------------------------------------------------------------------------------------------------------|---------|
| S5 | S1 OR S2 OR S3                                                                                            | Limiters - Publication Date: 20150101-20191231<br>Expanders - Apply equivalent subjects<br>Search modes - Boolean/Phrase | Interface - EBSCOhost<br>Research Databases<br>Search Screen - Advanced Search<br>Database - Child Development & Adolescent Studies | 1       |
| S4 | S1 OR S2 OR S3                                                                                            | Expanders - Apply equivalent subjects<br>Search modes - Boolean/Phrase                                                   | Interface - EBSCOhost<br>Research Databases<br>Search Screen - Advanced Search<br>Database - Child Development & Adolescent Studies | 55      |
| S3 | TX (NIV or NPPV or NIPPV or NIAV)                                                                         | Expanders - Apply equivalent subjects<br>Search modes - Boolean/Phrase                                                   | Interface - EBSCOhost<br>Research Databases<br>Search Screen - Advanced Search<br>Database - Child Development & Adolescent Studies | 17      |
| S2 | TX ((ventilat* or respirat*) N2 (non-invasive or noninvasive))                                            | Expanders - Apply equivalent subjects<br>Search modes - Boolean/Phrase                                                   | Interface - EBSCOhost<br>Research Databases<br>Search Screen - Advanced Search<br>Database - Child Development & Adolescent Studies | 14      |
| S1 | TX (cpap or ncpap or continuous positive airway pressure or aprv or airway pressure release ventilation*) | Expanders - Apply equivalent subjects<br>Search modes - Boolean/Phrase                                                   | Interface - EBSCOhost<br>Research Databases<br>Search Screen - Advanced Search<br>Database - Child Development & Adolescent Studies | 31      |
