# Supplementary material
Source: HighWire-hosted journal article supplement (https://erj.ersjournals.com/content/59/6/2101404)
Supplement: inline-supplementary-material-2 [file inline-supplementary-material-2.pdf]

**Online Table S2.1:** Patients (pathologies) who may benefit from continuous positive airway pressure (CPAP).

| Author                  | Country   | Journal            | Type of study                                                      | Number of patients        | Ages         | Pathologies                                                                                                                | Comments                                                                              |
|-------------------------|-----------|--------------------|--------------------------------------------------------------------|---------------------------|--------------|----------------------------------------------------------------------------------------------------------------------------|---------------------------------------------------------------------------------------|
| Afsharpaiman et al. [1] | Australia | Sleep & Breathing  | Retrospective cohort                                               | 46 children<br>25 had OSA | 3 m-14 yrs   | Achondroplasia                                                                                                             | 9 treated with CPAP = 9.8% of those > 2 yrs and 28% of those < 2 yrs                  |
| Mogayzel et al. [2]     | USA       | J Pediatr          | Prospective cohort                                                 | 88 children               | 1 m-12.6 yrs | Achondroplasia                                                                                                             | 2 treated with CPAP                                                                   |
| Schluter et al. [3]     | Germany   | Georgian Med News  | Cohort study                                                       | 22 + 2 children           | 1.3 m-15 yrs | 22 achondroplasia + 2 hypochondroplasia                                                                                    | 3 treated with CPAP or BPAP                                                           |
| Waters et al. [4]       | Australia | Am J Med Gen       | Cohort study                                                       | 30 children               | 1-47.6 yrs   | Achondroplasia                                                                                                             | 13 treated with CPAP                                                                  |
| Julliand et al. [5]     | France    | Am J Med Gen       | Retrospective cohort                                               | 30 children               | 0.4-17.1 yrs | Achondroplasia                                                                                                             | 1 treated with CPAP, 4 with BPAP                                                      |
| Tenconi et al. [6]      | France    | Am J Med Gen       | Retrospective cohort                                               | 43 children               | 0.3-13.3 yrs | Achondroplasia                                                                                                             | 2 treated with CPAP                                                                   |
| Fauroux et al. [7]      | France    | AJRCCM             | Retrospective cohort                                               | 12 children               | 8 m-6.5 yrs  | Laryngomalacia                                                                                                             | 12 treated with CPAP                                                                  |
| Zwacka et al. [8]       | Germany   | Sleep & Breathing  | Retrospective cohort                                               | 10 infants                | 1 to 5 m     | Laryngomalacia                                                                                                             | 10 treated with CPAP                                                                  |
| Essouri et al. [9]      | France    | Intensive Care Med | Prospective physiological + clinical study (Poeso + Pgas measures) | 10 infants                | 3-18 m       | 5 laryngomalacia (1 + Down syndrome), 3 tracheomalacia (1 + Down syndrome), 1 tracheal hypoplasia, 1 Pierre Robin Sequence | BPAP associated with patient-ventilator asynchrony (trigger insufficiently sensitive) |
| Kawaguchi et al. [10]   | USA       | J Pediatr Surgery  | Retrospective cohort                                               | 4 type III and 5 type IV  | 8 m-21 yrs   | Tracheomalacia after laryngotracheal cleft                                                                                 | 5 treated with CPAP                                                                   |

|                         |           |                                   |                      |                                                 |         |                                                                                                                                            |                                                        |
|-------------------------|-----------|-----------------------------------|----------------------|-------------------------------------------------|---------|--------------------------------------------------------------------------------------------------------------------------------------------|--------------------------------------------------------|
|                         |           |                                   |                      | laryngotracheal cleft                           |         | repair                                                                                                                                     |                                                        |
| Pellen et al. [11]      | Australia | Int J Pediatr Otorhinolaryngology | Retrospective cohort | 16 infants (1 death)                            | 0-9 m   | Congenital tracheal stenosis                                                                                                               | 10/15 treated with CPAP                                |
| Shatz et al. [12]       | Israel    | Otol Rhinol Laryngol              | Retrospective cohort | 50 infants                                      | 1-18 m  | Pharyngomalacia                                                                                                                            | 9/50 treated with BPAP, 5/50 with CPAP                 |
| Lesnik et al. [13]      | France    | Laryngoscope                      | Retrospective cohort | 26 children                                     | <17 yrs | Bilateral vocal cord paralysis                                                                                                             | 8 treated with CPAP (< 10 yrs)                         |
| Nanaware et al. [14]    | India     | Indian J Pediatr                  | Retrospective cohort | 56 children, 23 with sleep disordered breathing | <18 yrs | 52% craniofacial anomaly, 17% NMD or skeletal disease, 1 vocal cord paralysis, 1 achondroplasia, 1 Bardet-Biedl, 1 Albright osteodystrophy | CPAP for 1 patient with bilateral vocal cord paralysis |
| Leboulanger et al. [15] | France    | Pediatrics                        | Retrospective cohort | 7 infants                                       | 1-10 m  | Pierre Robin Sequence                                                                                                                      | 5 treated with CPAP, 2 with BPAP                       |
| Amaddeo et al. [16]     | France    | Plastic Reconstructive Surgery    | Prospective cohort   | 44 infants                                      | 0-2 m   | Pierre Robin Sequence                                                                                                                      | 9/44 treated with CPAP                                 |
| Daniel et al. [17]      | Australia | Int J Pediatr Otorhinolaryngology | Retrospective cohort | 39 infants                                      | > 12 m  | Pierre Robin Sequence                                                                                                                      | 18/39 treated with CPAP                                |

|                       |          |                                             |                                               |              |                 |                                                                                                                                                                                                                  |                                                                                                                                          |
|-----------------------|----------|---------------------------------------------|-----------------------------------------------|--------------|-----------------|------------------------------------------------------------------------------------------------------------------------------------------------------------------------------------------------------------------|------------------------------------------------------------------------------------------------------------------------------------------|
|                       |          | ryngology                                   |                                               |              |                 |                                                                                                                                                                                                                  |                                                                                                                                          |
| Filip et al.<br>[18]  | Norway   | Cleft<br>Palate<br>Craniofaci<br>al Surgery | Retrospective<br>national cohort<br>1980-2010 | 104 children | 3.3-33.4<br>yrs | Pierre Robin Sequence                                                                                                                                                                                            | 8 treated with CPAP<br>(duration days to 1 yr), 8<br>nasopharyngeal tube, 2<br>oropharyngeal tube, 6<br>tracheotomy                      |
| Kam et al.<br>[19]    | Canada   | Canadian<br>Respir J                        | Retrospective<br>cohort 2000-<br>2010         | 139 patients | 9 ± 14 m        | 139 Pierre Robin<br>Sequence                                                                                                                                                                                     | 20 treated with CPAP, 28<br>nasopharyngeal tube, 45<br>tong-lip adhesion, 5<br>mandibular distraction<br>osteogenesis, 19<br>tracheotomy |
| Trider et al.<br>[20] | Canada   | Int J<br>Pediatr<br>Otorhinola<br>ryngology | Prospective<br>study                          | 51 children  | 0-14 yrs        | CHARGE syndrome                                                                                                                                                                                                  | 10/51 treated with CPAP                                                                                                                  |
| Girbal et al.<br>[21] | Portugal | Rev Port<br>Pneumol                         | Retrospective<br>study                        | 68 children  | 1-176 m         | 5 Pierre Robin Sequence<br>5 airway malacia<br>5 Down syndrome<br>6 Prader Willi syndrome<br>9 cerebral palsy<br>10 craniofacial<br>malformation<br>5 mucopolysaccharidosis<br>6 metabolic diseases<br>3 obesity | CPAP (n=52) or NIV<br>(n=16)                                                                                                             |

|                           |        |                                               |                      |                                                         |              |                                                                                                                                                            |                                                              |
|---------------------------|--------|-----------------------------------------------|----------------------|---------------------------------------------------------|--------------|------------------------------------------------------------------------------------------------------------------------------------------------------------|--------------------------------------------------------------|
| Marcus et al. [22]        | USA    | J Pediatr                                     | Retrospective cohort | 94 children                                             | 0-19 yrs     | 25 obesity<br>23 craniofacial malformation<br>17 idiopathic OSA<br>12 Down syndrome<br>5 cerebral palsy                                                    |                                                              |
| Guilleminault et al. [23] | USA    | J Pediatr                                     | Retrospective study  | 74 infants                                              | < 12 m       | Syndrome in 38/74: 9 Pierre Robin Sequence, 2 cleft palate, 2 Hunter, 3 achondroplasia, 7 cerebral palsy, 3 epilepsy, 2 hemiplegia, 1 hydrocephalus, 1 NMD | 18 discontinued CPAP during follow up                        |
| Jarund et al. [24]        | Sweden | Scandinavian J Plastic Reconstructive Surgery | Retrospective study  | 76 children with Apert (27), Crouzon (47), Pfeiffer (2) | 23% < 13 yrs | 76 children with Apert (27), Crouzon (47), Pfeiffer (2)                                                                                                    | 7 patients were treated with CPAP after craniofacial surgery |
| Jarund et al. [25]        | Sweden | Scandinavian J Plastic Reconstructive Surgery | Retrospective study  | 13 children with craniofacial malformation, 13 had OSA  |              | 1 child had a tracheostomy, 10 of the 12 others accepted CPAP                                                                                              |                                                              |
| Padman et al. [26]        | USA    | Clinical Pediatr                              | Retrospective cohort | 10 children                                             | 3-18 yrs     | Obesity and craniofacial malformation                                                                                                                      | BPAP in<br>6 obesity<br>3 craniofacial                       |

|                      |                 |                                       |                                |             |              |                                                                                                                                                                                                     |                                                                                           |
|----------------------|-----------------|---------------------------------------|--------------------------------|-------------|--------------|-----------------------------------------------------------------------------------------------------------------------------------------------------------------------------------------------------|-------------------------------------------------------------------------------------------|
|                      |                 |                                       |                                |             |              |                                                                                                                                                                                                     | malformation                                                                              |
| Massa et al. [27]    | UK              | Arch Dis Childh                       | Retrospective cohort 1994-1999 | 66 children | 0.1-19 yrs   | 24 craniofaciostenosis<br>6 isolated facial defect<br>4 osteochondrodysplasia<br>8 mucopolysaccharidosis,<br>4 NMD<br>4 obesity<br>2 Down syndrome, 2 cerebral palsy<br>3 airway malacia<br>+ other | 42 accepted CPAP, 22 refused<br>3 patients could be weaned after craniofacial surgery     |
| Gonsalez et al. [28] | UK              | Childs Nervous System                 | Retrospective cohort           | 8 children  | 2.2-15 yrs   | Craniofacial dysostosis                                                                                                                                                                             | CPAP successful in 5/8                                                                    |
| Bannink et al. [29]  | The Netherlands | Inter J Oral Maxillofacial Surgery    | Retrospective cohort           | 11 children | 4.1-23.2 yrs | Syndromic craniofaciostenosis: 3 Apert, 6 Crouzon, 3 Pfeiffer                                                                                                                                       | 3 CPAP or nasopharyngeal tube before mid-face advancement, 3/11 needed CPAP after surgery |
| Shine et al. [30]    | Australia       | Arch Otolaryngology Head Neck Surgery | Retrospective cohort           | 19 children | 2-18 yrs     | Obesity                                                                                                                                                                                             | 10 needed CPAP after AT                                                                   |
| Beebe et al.         | USA             | PlosOne                               | Prospective                    | 13 obese    | 14.8 ±       | Obesity                                                                                                                                                                                             |                                                                                           |

|                                |        |                                   |                      |                                                    |                  |                                           |                                                                                                                 |
|--------------------------------|--------|-----------------------------------|----------------------|----------------------------------------------------|------------------|-------------------------------------------|-----------------------------------------------------------------------------------------------------------------|
| [31]                           |        |                                   | study                | adolescents treated with CPAP for OSA              | 1.8 yrs          | 6 were compliant and 7 not                |                                                                                                                 |
| Puri et al. [32]               | USA    | J Clin Sleep Med                  | Retrospective cohort | 57 children                                        | 1.6 -18 yrs      | 37 obesity<br>3 craniofacial malformation |                                                                                                                 |
| Konstantino poulou et al. [33] | USA    | Sleep Med                         | Prospective study    | 23 children                                        | 8-19 yrs         | Down syndrome (20 with OSA)               | 10 children with Down, syndrome were randomized to CPAP                                                         |
| Rosen et al. [34]              | USA    | Clinical Pediatr                  | Retrospective study  | 29 infants with Down syndrome, 16 had OSA          | < 2 yrs          | Down syndrome                             | 6 treated with CPAP<br>Spontaneous improvement in 3 infants after 5 to 10 m                                     |
| Shete et al. [35]              | USA    | Int J Pediatr Otorhinolaryngology | Retrospective study  | AT in 11 children with Down syndrome + 11 controls | mean age 8.5 yrs | Down syndrome                             | 6 required CPAP or BPAP after AT                                                                                |
| Esbensen et al. [36]           | USA    | J Dev Behav Pediatr               | Retrospective study  | 954 children<br>455 (47.7%) had a PSG              | 5-25 yrs         | Down syndrome<br>258 (27%) had OSA:       | Patients with OSA:<br>18.6% treated with CPAP<br>82 (8.6%) had OSA + behavior disorder: 19.5% treated with CPAP |
| Dudoignon                      | France | Am J Med                          | Retrospective        | 57 T21                                             | 6.2 ± 5.9        | Down syndrome                             | 15/57 treated with CPAP                                                                                         |

|                      |           |                                         |                                                                           |                                                       |                             |                                                                                                              |                                                                  |
|----------------------|-----------|-----------------------------------------|---------------------------------------------------------------------------|-------------------------------------------------------|-----------------------------|--------------------------------------------------------------------------------------------------------------|------------------------------------------------------------------|
| et al. [37]          |           | Genetics<br>Part A                      | study                                                                     |                                                       | yrs                         |                                                                                                              | for OSA<br>4/57 treated with NIV for hypoventilation             |
| Amaddeo et al. [38]  | France    | Pediatr<br>Pulmonol                     | Retrospective study                                                       | 31 children started on CPAP in an out-patient setting | 0.8 m-17.5 yrs              | 7 Down syndrome, 3 achondroplasia, 3 obesity and other                                                       | 4 (3 Down syndrome) not compliant<br>3 patients weaned from CPAP |
| Sudarsan et al. [39] | India     | Int J<br>Pediatr<br>Otorhinolaryngology | Prospective study, efficacy AT in mucopolysaccharidosis and Down syndrome | 73 children                                           | 6-12 yrs                    | Mucopolysaccharidosis<br>Down syndrome                                                                       | 17 mucopolysaccharidosis and 29 Down syndrome treated with CPAP  |
| Tirosh et al. [40]   | Israel    | Acta<br>Pediatr                         | Description of 4 patients                                                 | 4 children with neurodisability                       | 6 - 16 yrs                  | 1 obesity + mental retardation, 1 attention-deficit/hyperactivity disorder, 1 epilepsy, 1 fragile X syndrome | CPAP possible in children with neurodisability                   |
| Al-Iede et al. [41]  | Australia | Sleep Med                               | Retrospective study                                                       | 148 children treated with CPAP for non-OSA            | 0.1-16.8 yrs<br>(64% < 1yr) | 47 chronic lung disease<br>37 congenital heart disease,<br>41 laryngomalacia,<br>16 tracheobronchomalacia,   |                                                                  |

|                      |                  |                          |                     |                                      |                |                                                                                 |                                                                         |
|----------------------|------------------|--------------------------|---------------------|--------------------------------------|----------------|---------------------------------------------------------------------------------|-------------------------------------------------------------------------|
|                      |                  |                          |                     |                                      |                | 5 congenital diaphragmatic hernia                                               |                                                                         |
| Kirk et al. [42]     | Canada           | Pediatr Pulmonol         | Retrospective study | 73 children                          | 0-18 yrs       | Myelomeningocele                                                                | 30 OSA: CPAP success in 18/21<br>25 CSA: NIV required in 7              |
| Khirani et al [43]   | France           | Crit Care                | Prospective study   | 12 infants                           | 2-22 m         | 5 BPD<br>4 laryngomalacia<br>1 OSA, 1 Down syndrome,<br>1 Pierre Robin Sequence |                                                                         |
| Waters et al. [44]   | Australia        | AJRCCM                   | Retrospective study | 80 children                          | 5.7 ± 0.5 yrs  | 53% of children had a congenital syndrome or malformation                       |                                                                         |
| Clift et al. [45]    | UK               | J Sleep Research         | Retrospective study | 17 children and young adults         | ?              | Prader Willi syndrome                                                           | 7/17 obese patients were treated with CPAP or BPAP (2 did not tolerate) |
| Pavone et al. [46]   | Italy and France | Pediatr Pulmonol         | Retrospective study | 70 children (< 20 yrs) and 18 adults |                | Prader Willi syndrome                                                           | 16/88 treated with CPAP or BPAP (> older patients)                      |
| Facchina et al. [47] | France           | Am J Med Genetics Part A | Retrospective study | 16 children                          | 10.5 ± 4.2 yrs | Mucopolysaccharidosis type IVA (Morquio)                                        | 4/16 treated with CPAP (OSA)<br>2/16 treated with NIV (hypoventilation) |
| Tabone et            | France           | Am J Med                 | Retrospective       | 7 children                           | 0.3-17.4       | 7 mucopolidosis                                                                 | 5 CPAP                                                                  |



|                     |        |                           |                     |                                                        |              |                                                                                                                             |                                                                                 |
|---------------------|--------|---------------------------|---------------------|--------------------------------------------------------|--------------|-----------------------------------------------------------------------------------------------------------------------------|---------------------------------------------------------------------------------|
| al. [48]            |        | Genetics                  | study               |                                                        | yrs          | 5 MLII, 1 type II-III, 1 type III: OSA in 6/7                                                                               | 1 NIV (hypoventilation)                                                         |
| Leotard et al. [49] | France | Ann Phys Rehabil Med      | Retrospective study | 15/188 patients with osteogenesis imperfecta had a PSG |              | 12/15 patients with osteogenesis imperfecta had sleep disordered breathing:                                                 | 2 patients treated with CPAP                                                    |
| Khirani et al. [50] | France | Am J Med Genetics Part A  | Retrospective study | 10 children                                            | 3.3-14.1 yrs | 10 pycnodysostosis                                                                                                          | 9/10 treated with CPAP Weaning in 3 patients, 2 after surgery and 1 spontaneous |
| Rosen et al. [51]   | USA    | Supportive Care in Cancer | Retrospective study | 70 children with cancer, PSG in 53, 9/20 severe OSA    | 6-21 yrs     | Neoplasms of the CNS                                                                                                        | 9 treated with CPAP (6 success) and 3 with brainstem tumor treated with BPAP    |
| Bunn et al. [52]    | UK     | Pediatr Cardiology        | Retrospective study | 4 children                                             | 3-34 m       | Congenital cardiopathy and PHT                                                                                              | NIV for 13 – 19 m, correction of PHT with NIV                                   |
| Domany et al. [53]  | USA    | J Clin Sleep Med          | Retrospective study | 65 children                                            | < 18 yrs     | Children with Ehlers Danlos referred to a sleep lab<br>17 OSA, 2 treated with CPAP (1 with mild OSA + somnolence and 1 with | No detailed information on CPAP                                                 |

|  |  |  |  |  |  |                          |  |
|--|--|--|--|--|--|--------------------------|--|
|  |  |  |  |  |  | moderate who refused AT) |  |
|--|--|--|--|--|--|--------------------------|--|

Abbreviations: m: months, yrs: years, OSA: obstructive sleep apnea, BPAP: bilevel positive airway pressure, NIV: noninvasive ventilation, Poeso: oesophageal pressure, Pgas: gastric pressure, NMD: neuromuscular disease, BPD: bronchopulmonary dysplasia, PSG: polysomnography, CNS: central nervous system, PHT: pulmonary hypertension, AT: adenotonsillectomy

## References

1. Afsharpaiman S, Sillence DO, Sheikvatan M, *et al.* Respiratory events and obstructive sleep apnea in children with achondroplasia: investigation and treatment outcomes. *Sleep Breath* 2011; 15: 755-761.
2. Mogayzel PJJ, Carroll JL, Loughlin GM, *et al.* Sleep-disordered breathing in children with achondroplasia. *J Pediatr* 1998; 132: 667-671.
3. Schlüter B, De Sousa G, Trowitzsch E, *et al.* Diagnostics and management of sleep-related respiratory disturbances in children with skeletal dysplasia caused by FGFR3 mutations (achondroplasia and hypochondroplasia). *Georgian Med News* 2011; 63-72.
4. Waters KA, Everett F, Sillence DO, *et al.* Treatment of obstructive sleep apnea in achondroplasia: evaluation of sleep, breathing, and somatosensory-evoked potentials. *Am J Med Genet* 1995; 59: 460-466.
5. Julliand S, Boule M, Baujat G, *et al.* Lung function, diagnosis, and treatment of sleep-disordered breathing in children with achondroplasia. *Am J Med Genet A* 2012; 158A: 1987-1993.
6. Tenconi R, Khirani S, Amaddeo A, *et al.* Sleep-disordered breathing and its management in children with achondroplasia. *Am J Med Genet A* 2017; 173: 868-878.
7. Fauroux B, Pigeot J, Polkey MI, *et al.* Chronic stridor caused by laryngomalacia in children: work of breathing and effects of noninvasive ventilatory assistance. *Am J Respir Crit Care Med* 2001; 164: 1874-1878.
8. Zwacka G, Scholle S, Kemper G, *et al.* Nasal CPAP therapy for infants with congenital stridor. *Sleep Breath* 1997; 2: 85-97.
9. Essouri S, Nicot F, Clement A, *et al.* Noninvasive positive pressure ventilation in infants with upper airway obstruction: comparison of continuous and bilevel positive pressure. *Intensive Care Med* 2005; 31: 574-580.
10. Kawaguchi AL, Donahoe PK, Ryan DP. Management and long-term follow-up of patients with types III and IV laryngotracheoesophageal clefts. *J Pediatr Surg* 2005; 40: 158-165.
11. Pellen G, Pandit C, Castro C, *et al.* Use of non-invasive ventilation in children with congenital tracheal stenosis. *Int J Pediatr Otorhinolaryngol* 2019; 127: 109672.

12. Shatz A, Goldberg S, Picard E, *et al.* Pharyngeal wall collapse and multiple synchronous airway lesions. . *Ann Otol Rhinol Laryngol* 2004; 113: 483-487.
13. Lesnik M, Thierry B, Glynn F, *et al.* Idiopathic bilateral vocal cord paralysis in infants: Case series and literature review. *Laryngoscope* 2015; 125: 1724-1728.
14. Nanaware SKV, Gothi D, Joshi JM. Sleep apnea. *Indian J Pediatr* 2006; 73: 597-601.
15. Leboulanger N, Picard A, Soupre V, *et al.* Physiologic and clinical benefits of noninvasive ventilation in infants with Pierre Robin sequence. *Pediatrics* 2010; 126: e1056-1063.
16. Amaddeo A, Abadie V, Chalouhi C, *et al.* Continuous positive airway pressure for upper airway obstruction in infants with Pierre Robin Sequence. *Plast Reconstruct Surg* 2016; 137: 609-612.
17. Daniel M, Bailey S, Walker K, *et al.* Airway, feeding and growth in infants with Robin sequence and sleep apnoea. *Int J Pediatr Otorhinolaryngol* 2013; 77: 499-503.
18. Filip C, Feragen KB, Lemvik JS, *et al.* Multidisciplinary aspects of 104 patients with Pierre Robin Sequence. *Cleft Palate Craniofac J* 2015; 52: 732-742.
19. Kam K, McKay M, MacLean J, *et al.* Surgical versus nonsurgical interventions to relieve upper airway obstruction in children with Pierre Robin sequence. *Can Respir J* 2015; 22: 171-175.
20. Trider CL, Corsten G, Morrison D, *et al.* Understanding obstructive sleep apnea in children with CHARGE syndrome. *Int J Pediatr Otorhinolaryngol* 2012; 76: 947-953.
21. Girbal IC, Goncalves C, Nunes T, *et al.* Non-invasive ventilation in complex obstructive sleep apnea--a 15-year experience of a pediatric tertiary center. *Rev Port Pneumol* 2014; 20: 146-151.
22. Marcus CL, Ward SL, Mallory GB, *et al.* Use of nasal continuous positive airway pressure as treatment of childhood obstructive sleep apnea. *J Pediatr* 1995; 127: 88-94.
23. Guilleminault C, Pelayo R, Clerk A, *et al.* Home nasal continuous positive airway pressure in infants with sleep-disordered breathing. *J Pediatr* 1995; 127: 905-912.
24. Jarund M, Lauritzen C. Craniofacial dysostosis: Airway obstruction and craniofacial surgery. *Scand J Plast Reconstr Surg Hand Surg* 1996; 30: 275-279.
25. Jarund M, Dellborg C, Carlson J, *et al.* Treatment of sleep apnoea with continuous positive airway pressure in children with craniofacial malformations. *Scand J Plast Reconstr Surg Hand Surg* 1999; 33: 67-71.
26. Padman R, Hyde C, Foster P, *et al.* The pediatric use of bilevel positive airway pressure therapy for obstructive sleep apnea syndrome: a retrospective review with analysis of respiratory parameters. *Clin Pediatr* 2002; 41: 163-169.
27. Massa F, Gonzalez S, Laverty A, *et al.* The use of nasal continuous positive airway pressure to treat obstructive sleep apnoea. *Arch Dis Child* 2002; 87: 438-443.

28. Gonsalez S, Thompson D, Hayward R, *et al.* Treatment of obstructive sleep apnoea using nasal CPAP in children with craniofacial dysostoses. *Childs Nerv Syst* 1996; 12: 713-719.
29. Bannink N, Nout E, Wolvius EB, *et al.* Obstructive sleep apnea in children with syndromic craniosynostosis: long-term respiratory outcome of midface advancement. *Int J Oral Maxillofac Surg* 2010; 39: 115-121.
30. Shine NP, Lannigan FJ, Coates HL, *et al.* Adenotonsillectomy for obstructive sleep apnea in obese children: effects on respiratory parameters and clinical outcome. *Arch Otolaryngol Head Neck Surg* 2006; 132: 1123-1127.
31. Beebe DW, Byars KC. Adolescents with obstructive sleep apnea adhere poorly to positive airway pressure (PAP), but PAP users show improved attention and school performance. *PLoS One* 2011; 6: e16924.
32. Puri P, Ross KR, Mehra R, *et al.* Pediatric positive airway pressure adherence in obstructive sleep apnea enhanced by family member positive airway pressure usage. *J Clin Sleep Med* 2016; 12: 959-963.
33. Konstantinopoulou S, Tapia IE, Kim JY, *et al.* Relationship between obstructive sleep apnea cardiac complications and sleepiness in children with Down syndrome. *Sleep Med* 2016; 17: 18-24.
34. Rosen D. Some infants with Down syndrome spontaneously outgrow their obstructive sleep apnea. *Clin Pediatr* 2010; 49: 1068-1071.
35. Shete MM, Stocks RMS, Sebelik ME, *et al.* Effects of adeno-tonsillectomy on polysomnography patterns in Down syndrome children with obstructive sleep apnea: a comparative study with children without Down syndrome. *Int J Pediatr Otorhinolaryngol* 2010; 74: 241-244.
36. Esbensen AJ, Beebe DW, Byars KC, *et al.* Use of sleep evaluations and treatments in children with Down syndrome. *J Dev Behav Pediatr* 2016; 37: 629-636.
37. Dudoignon B, Amaddeo A, Frapin A, *et al.* Obstructive sleep apnea in Down syndrome: Benefits of surgery and noninvasive respiratory support. *Am J Med Genet A* 2017; 173: 2074-2080.
38. Amaddeo A, Frapin A, Touil S, *et al.* Outpatient initiation of long-term continuous positive airway pressure in children. *Pediatr Pulmonol* 2018; 53: 1422-1428.
39. Sudarsan SS, Paramasivan VK, Arumugam SV, *et al.* Comparison of treatment modalities in syndromic children with obstructive sleep apnea--a randomized cohort study. *Int J Pediatr Otorhinolaryngol* 2014; 78: 1526-1533.
40. Tirosh E, Tal Y, Jaffe M. CPAP treatment of obstructive sleep apnoea and neurodevelopmental deficits. *Acta Paediatr* 1995; 84: 791-794.
41. Al-Iede M, Kumaran R, Waters K. Home continuous positive airway pressure for cardiopulmonary indications in infants and children. *Sleep Med* 2018; 48: 86-92.
42. Kirk VG, Morielli A, Gozal D, *et al.* Treatment of sleep-disordered breathing in children with myelomeningocele. *Pediatr Pulmonol* 2000; 30: 445-452.
43. Khirani S, Ramirez A, Aloui S, *et al.* Continuous positive airway pressure titration in infants with severe upper airway obstruction or bronchopulmonary dysplasia. *Crit Care* 2013; 17: R167.
44. Waters KA, Everett FM, Bruderer JW, *et al.* Obstructive sleep apnea: the use of nasal CPAP in 80 children. *Am J Respir Crit Care Med* 1995; 152: 780-785.

45. Clift S, Dahlitz M, Parkes JD. Sleep apnoea in the Prader-Willi syndrome. *J Sleep Res* 1994; 3: 121-126.
46. Pavone M, Caldarelli V, Khirani S, *et al.* Sleep disordered breathing in patients with Prader-Willi syndrome: A multicenter study. *Pediatr Pulmonol* 2015; 50: 1354-1359.
47. Facchina G, Amaddeo A, Baujat G, *et al.* A retrospective study on sleep-disordered breathing in Morquio-A syndrome. *Am J Med Genet A* 2018; 176: 2595-2603.
48. Tabone L, Caillaud C, Amaddeo A, *et al.* Sleep-disordered breathing in children with mucopolidosis. *Am J Med Genet A* 2019; 179: 1196-1204.
49. Léotard A, Taytard J, Aouate M, *et al.* Diagnosis, follow-up and management of sleep-disordered breathing in children with osteogenesis imperfecta. *Ann Phys Rehabil Med* 2018; 61: 135-139.
50. Khirani S, Amaddeo A, Baujat G, *et al.* Sleep-disordered breathing in children with pycnodysostosis. *Am J Med Genet A* 2020; 182: 122-129.
51. Rosen G, Brand SR. Sleep in children with cancer: case review of 70 children evaluated in a comprehensive pediatric sleep center. *Support Care Cancer* 2011; 19: 985-994.
52. Bunn HJ, Roberts P, Thomson AH. Noninvasive ventilation for the management of pulmonary hypertension associated with congenital heart disease in children. *Pediatr Cardiol* 2004; 25: 357-359.
53. Domany KA, Hantragool S, Smith DF, *et al.* Sleep disorders and their management in children with Ehlers-Danlos syndrome referred to sleep clinics. *J Clin Sleep Med* 2018; 14: 623-629.
