# Supplementary material
Source: HighWire-hosted journal article supplement (https://erj.ersjournals.com/content/59/6/2101404)
Supplement: inline-supplementary-material-3 [file inline-supplementary-material-3.pdf]

**Online Table S2.2:** Patients (pathologies) who may benefit from noninvasive ventilation (NIV).

| Author               | Country | Journal               | Type of study       | Disorders             | Ages                             | NIV                                                                                                                                           | Comments                                                                                   |
|----------------------|---------|-----------------------|---------------------|-----------------------|----------------------------------|-----------------------------------------------------------------------------------------------------------------------------------------------|--------------------------------------------------------------------------------------------|
| Birnkrant et al. [1] | USA     | Pediatr Neurology     | Retrospective study | 4 SMA I               | 2, 4, 7, and 7 m                 | NIV for 1, 3, 5, and 5 m                                                                                                                      | All died before 1 yr                                                                       |
| Bach et al. [2]      | USA     | Chest                 | Retrospective study | 11 SMA I              | 2 - 11 m                         | 11 treated with NIV after ARF, 8 continued NIV during 15 to 59 m                                                                              |                                                                                            |
| Bach et al. [3]      | USA     | Pediatr Pulmonol      | Retrospective study | 56 SMA I              | Respiratory failure before 2 yrs | 33 treated with NIV compared to 16 treated with tracheotomy                                                                                   | 31/33 survived to $42 \pm 26$ m, fewer hospitalisations > 5 yrs as compared to tracheotomy |
| Bach et al. [4]      | USA     | Am J Phys Med Rehab   | 2 cases             | 2 SMA I               | 7 m, 3 yrs                       | 2 “high span” NIV (NIV settings not specified)                                                                                                | No pectus excavatum, survival until 7 and 3 yrs with NIV 24h/24                            |
| Bach et al. [5]      | USA     | Am J Phys Med Rehab   | Retrospective study | 106 SMA I             | ?                                | Untreated died at $9.6 \pm 4$ m, 22 with tracheotomy survived at $70.5 \pm 43.3$ m, 47 treated with NIV, 29/47 were $65.2 \pm 45.8$ m, 8 died | Same survival with NIV as compared to tracheotomy but fewer hospitalisations with NIV      |
| Lemoine et al [6]    | USA     | Pediatr Crit Care Med | Retrospective study | 49 infants with SMA I | 1 - 7 m                          | All treated with NIV                                                                                                                          | Longer survival in the proactive as                                                        |

|                       |         |                     |                               |                                                           |               |                                                                                                                                     |                                                                                                                                  |
|-----------------------|---------|---------------------|-------------------------------|-----------------------------------------------------------|---------------|-------------------------------------------------------------------------------------------------------------------------------------|----------------------------------------------------------------------------------------------------------------------------------|
|                       |         |                     |                               |                                                           |               |                                                                                                                                     | compared to the supportive group                                                                                                 |
| Chatwin et al. [7]    | UK      | Arch Dis Childh     | Retrospective study           | 13 SMA I                                                  | 4-24 m        | All treated with NIV + MI-E, 5 died, duration of NIV not specified                                                                  | NIV + MI-E associated with a decrease in chest deformity                                                                         |
| Ottonello et al. [8]  | Italy   | Am J Phys Med Rehab | Retrospective study           | 16 infants with SMA I                                     | < 3 yrs       | All treated with NIV                                                                                                                | NIV reduces ARF                                                                                                                  |
| Gregoretti et al. [9] | Italy   | Pediatrics          | Retrospective study 1999-2010 | 194 children with SMA I                                   |               | 121 (62%) no respiratory support, 42 (22%) IV, 31 (16%) NIV<br>The choice of NIV increased from 8% in 1999-2004 to 23% in 2005-2010 | Survival with NIV was 68% at 2 yrs and 45% at 4 yrs (95% and 89% with IV)<br>Nearly all non treated patients died < 2 yrs of age |
| Pane et al. [10]      | Italy   | Neurology           | Retrospective study           | 122 children with SMA I                                   | 3 - 266 m     | Survival only possible with NIV > 16h/24 or tracheotomy + nutritional support after the age of 2 yrs                                |                                                                                                                                  |
| Ioos et al. [11]      | France  | Chest               | Retrospective cohort          | 33 SMA I, 35 SMA I-II<br>100 SMA II<br>12 SMA II          | ? (no access) | NIV for 43% SMA I-II<br>38% SMA II                                                                                                  |                                                                                                                                  |
| Mellies et al. [12]   | Germany | Neuromuscul Disord  | Prospective study             | 6 infants SMA I + 1 SMA II (+ 6 SMA controls without NIV) | 6 -11 yrs     | 7 treated with NIV                                                                                                                  | 6 – 12 m: improvement in sleep disordered breathing symptoms, sleep                                                              |

|                         |           |                      |                                               |                                                                                                               |             |                                                                                                                                       |                                                                                                                                |
|-------------------------|-----------|----------------------|-----------------------------------------------|---------------------------------------------------------------------------------------------------------------|-------------|---------------------------------------------------------------------------------------------------------------------------------------|--------------------------------------------------------------------------------------------------------------------------------|
|                         |           |                      |                                               |                                                                                                               |             |                                                                                                                                       | quality + architecture                                                                                                         |
| Vasconcelos et al. [13] | Portugal  | Revista Port Pneumol | Retrospective study                           | 7 SMA I, 11 type II, 4 type III                                                                               | 6 m -26 yrs | 17/22 treated with NIV                                                                                                                | NIV associated with a decrease in thoracic deformity and ARF                                                                   |
| Han et al. [14]         | Korea     | PlosOne              | Retrospective study in one center (2000-2013) | Home mechanical ventilation in 57 children with child-onset NMD: 58% SMA, 51% SMA I                           |             | NIV in only 9/57 children                                                                                                             | Decrease of hospitalisations after start of home mechanical ventilation but most children (48/57) were on IV                   |
| Kapur et al. [15]       | Australia | Pediatr Pulmonol     | Cross-sectional study                         | 3 SMA type I, 15 SMA type II and 7 SMA type III                                                               | 0 - 18 yrs  | 10 (40%) required NIV: 5 for sleep disordered breathing, 5 for lower respiratory tract infection in the pediatric intensive care unit |                                                                                                                                |
| Markstrom et al. [16]   | Sweden    | Acta Pediatr         | Retrospective study                           | 18 infants treated with NIV: 7 SMA intermediate, 3 CCHS, 2 Down syndrome, 2 NMD, 1 diaphragmatic paralysis, 1 | 1 - 12 m    | All treated with NIV                                                                                                                  | NIV for hypoventilation in 12 and cough/recurrent infections in 6 SMA<br>Duration of NIV 1 – 84 m<br>NIV was discontinued in 6 |

|                         |           |                           |                        |                                                                            |            |                                                      |                                                                                                                                                           |
|-------------------------|-----------|---------------------------|------------------------|----------------------------------------------------------------------------|------------|------------------------------------------------------|-----------------------------------------------------------------------------------------------------------------------------------------------------------|
|                         |           |                           |                        | myelomening<br>cele, 1<br>Leigh's sd                                       |            |                                                      | infants                                                                                                                                                   |
| Ishikawa et<br>al. [17] | Japan     | Neuromuscul<br>Disord     | Retrospective<br>study | 3 cohorts of<br>Duchenne<br>patients:<br>untreated,<br>tracheotomy,<br>NIV |            | 88 treated with NIV                                  | Longer survival<br>with NIV (mean<br>39.6 yrs)                                                                                                            |
| Mellies et al.<br>[18]  | Germany   | Eur Respir J              | Retrospective<br>study | 5 Duchenne<br>9 muscular<br>dystrophy<br>12 neuropathy<br>4 other NMD      | 6 - 19 yrs | All treated with NIV                                 | NIV improves<br>daytime and<br>nocturnal gas<br>exchange and<br>sleep quality<br>Re-appearance of<br>sleep disordered<br>breathing with<br>NIV withdrawal |
| Mellies et al.<br>[19]  | Germany   | Neurology                 | Retrospective<br>study | 7 juvenile<br>Pompe<br>disease                                             | 3 - 27 yrs | 2/7 treated with NIV                                 | NIV improves<br>nocturnal and<br>daytime gas<br>exchange                                                                                                  |
| Nabatame et<br>al. [20] | Japan     | Brain & Develop           | Retrospective<br>study | 4 children<br>juvenile<br>Pompe<br>disease                                 | 9 - 15 yrs | 3 / 4 treated with NIV                               | No deaths and<br>resumption sleep<br>disordered<br>breathing<br>symptoms                                                                                  |
| Suresh et al.<br>[21]   | Australia | J Pediatr Child<br>Health | Retrospective<br>study | 34 Duchenne                                                                | 1 - 15 yrs | 11 treated with NIV<br>because of<br>hypoventilation |                                                                                                                                                           |

|                     |        |                  |                        |                                                                                          |              |                                                                                                  |                                                                                                                           |
|---------------------|--------|------------------|------------------------|------------------------------------------------------------------------------------------|--------------|--------------------------------------------------------------------------------------------------|---------------------------------------------------------------------------------------------------------------------------|
| Khan et al. [22]    | UK     | Arch Dis Childh  | Retrospective study    | 8 children:<br>4 congenital myopathy<br>2 congenital muscular dystrophy<br>2 rigid spine | 6 - 13 years | All treated with NIV                                                                             | Decrease in sleep disordered breathing symptoms, decrease wake time, better SpO <sub>2</sub>                              |
| Katz et al. [23]    | Canada | Arch Dis Childh  | Prospective study      | 49 children with progressive NMD                                                         | 6 - 17 yrs   | 7 had nocturnal hypoventilation<br>6 were treated with NIV                                       | After one yr of NIV: greater decrease in general perception of health status on the Child Health Questionnaire (CHQ-PF50) |
| Kherani et al. [24] | Canada | Pediatr Pulmonol | Retrospective study    | 51 infants with NMD                                                                      | < 1 yr       | 25/51 treated with NIV<br>56% NMD<br>7 /25 weaned from NIV<br>4 children NIV for palliative care |                                                                                                                           |
| Simonds et al. [25] | UK     | Eur Respir J     | Retrospective study    | 40 children with NMD or skeletal disease                                                 | 9 m-16 yrs   | 38/40 tolerated NIV                                                                              | Improvement in nighttime and daytime blood gases                                                                          |
| Wallis et al. [26]  | UK     | Arch Dis Childh  | Cross sectional survey | 933 children on home ventilation                                                         | < 17 yrs     | 704 treated with NIV, 25 CCHS, 88 Duchenne, 10 SMA, 90 other NMD, 9                              |                                                                                                                           |

|                         |        |                                  |                                        |                                                                 |                             |                                                    |  |
|-------------------------|--------|----------------------------------|----------------------------------------|-----------------------------------------------------------------|-----------------------------|----------------------------------------------------|--|
|                         |        |                                  | (questionnaire)                        |                                                                 |                             | cyphoscoliosis, 58 Prader Willi syndrome/obesity   |  |
| Sato et al. [27]        | Japan  | Brain Development                | Retrospective survey                   | 48 patients with Fukuyama congenital muscular dystrophy         | 3.6-31.9 yrs                | 14 treated with NIV (mean age at NIV start 12 yrs) |  |
| Nadeau et al. [28]      | UK     | Neurology                        | Retrospective study                    | 13 patients with Ullrich congenital muscular dystrophy          | > 15 yrs at last evaluation | 9/13 started NIV at a mean age of 14.3 yrs         |  |
| Yonekawa et al. [29]    | Japan  | J Neurol, Neurosurg & Psychiatry | Cross sectional survey (questionnaire) | 33 children + adults with Ullrich congenital muscular dystrophy |                             | NIV started in 13 children, mean age 11.2 yrs      |  |
| Quijano-Roy et al. [30] | France | Neuromuscul Disord               | Retrospective study                    | 7 children with COL6 myopathy                                   | 6.7 ± 8.7 yrs               | NIV in 2/7 patients                                |  |
| Muntoni et al. [31]     | UK     | Eur J Pediatr Neurol             | Retrospective study                    | 5 patients with new form of muscular dystrophy with             | < 11 yrs                    | 3 on NIV (2 died)                                  |  |

|                         |         |                            |                         |                                                                 |                   |                                                                       |  |
|-------------------------|---------|----------------------------|-------------------------|-----------------------------------------------------------------|-------------------|-----------------------------------------------------------------------|--|
|                         |         |                            |                         | secondary<br>merosine<br>deficiency                             |                   |                                                                       |  |
| Scoto et al.<br>[32]    | UK      | Neurology                  | Retrospective<br>survey | 41 children<br>and adults<br>with SEPN1-<br>related<br>myopathy | 1-60 yrs          | Mean age of NIV start<br>13.9 yrs<br>1 child full-time NIV<br>at 1 yr |  |
| Schara et al.<br>[33]   | Germany | Eur J Pediatr<br>Neurology | Retrospective<br>survey | 11 children<br>with<br>SEPN1-<br>related<br>myopathy            | 5-21 yrs          | NIV in 4 children at a<br>mean age of 11 yrs                          |  |
| Caggiano et<br>al. [34] | France  | Neuromuscul<br>Disord      | Retrospective<br>study  | 6 children<br>with SEPN1-<br>related<br>myopathy (+1<br>adult)  | 1-18 yrs          | 5 treated with NIV<br>(diaphragmatic<br>dysfunction)                  |  |
| Caggiano at<br>al. [35] | France  | Eur J Pediatr<br>Neurology | Retrospective<br>study  | 5 infants with<br>congenital<br>myasthenic<br>syndrome          | 3, 6 and 24<br>mo | 3/5 infants treated<br>with NIV                                       |  |
| Payo et al<br>[36]      | Spain   | Eur Spine J                | Retrospective<br>study  | 24 children<br>severe<br>scoliosis (17<br>NMD, 7<br>other)      | 9-19 yrs          | 8 children long term<br>NIV (pre-operative)                           |  |
| Kirk et al.             | Canada  | Pediatr                    | Retrospective           | 73 children<br>with                                             | 0-18 yrs          | 25 central sleep apnea:<br>7 required NIV                             |  |

|                        |           |                           |                                        |                                                 |                |                                                                                                              |  |
|------------------------|-----------|---------------------------|----------------------------------------|-------------------------------------------------|----------------|--------------------------------------------------------------------------------------------------------------|--|
| [37]                   |           | Pulmonol                  | study                                  | myelomeningocele                                |                | 30 with OSA: CPAP successful in 18/21                                                                        |  |
| Nashed et al. [38]     | Canada    | J Inherited Metabolic Dis | Retrospective study                    | 11 children with mucopolysaccharidosis          | 08-17.8 yrs    | 4 treated with NIV                                                                                           |  |
| Tibbals et al. [39]    | Australia | Pediatr Pulmonol          | Retrospective study                    | 4 children with CCHS                            | 6-16 yrs       | 4 treated with NIV                                                                                           |  |
| Vanderlaan et al. [40] | USA       | Pediatr Pulmonol          | Cross-sectional survey (questionnaire) | 196 patients with CCHS                          | 0.4-38 yrs     | 55 treated with NIV, 5 with negative pressure ventilation, 17 with phrenic nerve pacing                      |  |
| Hasegawa et al. [41]   | Japan     | Pediatr International     | Cross sectional survey (questionnaire) | 37 CCHS                                         | 4 m-34 yrs     | 14 treated with NIV + 1 with phrenic nerve pacing                                                            |  |
| Diep et al. [42]       | USA       | Respiration               | Retrospective study                    | 18 CCHS                                         | 19.5 ± 10 yrs  | 3 prior NIV, 13 transitioned to phrenic nerve pacing with success, 1 failure due to upper airway obstruction |  |
| Facchina et al. [43]   | France    | Am J Clin Gen Part A      | Retrospective study                    | 16 children with mucopolysaccharidosis type IVA | 10.5 ± 4.2 yrs | 2/16 treated with NIV<br>4./16 treated with CPAP (all > 11 yrs)                                              |  |



|                       |                  |                     |                                                           |                                                            |               |                                                                                          |  |
|-----------------------|------------------|---------------------|-----------------------------------------------------------|------------------------------------------------------------|---------------|------------------------------------------------------------------------------------------|--|
|                       |                  |                     |                                                           | (Morquio)                                                  |               |                                                                                          |  |
| Tabone et al. [44]    | France           | Am J Med Gen Part A | Retrospective study                                       | 7 patients with mucopolidosis (5 type II, 1 II-III, 1 III) | 0.3-17.4 yrs  | 5 treated with CPAP, 1 with NIV due to hypoventilation                                   |  |
| Dudoignon et al. [45] | France           | Am J Med Gen Part A | Retrospective study                                       | 57 children with Down syndrome                             | 6.2 ± 5.9 yrs | 4/57 treated with NIV<br>15/57 treated with CPAP                                         |  |
| Clift et al. [46]     | UK               | J Sleep Research    | Retrospective study                                       | 17 children with Prader Willi syndrome                     | ?             | 7/17 treated with CPAP or BPAP (most obese, 2 did not tolerate)                          |  |
| Pavone et al. [47]    | Italy and France | Pediatr Pulmonol    | Retrospective study                                       | 70 children and 18 adults with Prader Willi syndrome       |               | 16/88 treated with CPAP or BPAP (> older patients)                                       |  |
| Repucci et al. [48]   | Canada           | Orphanet J Rare Dis | Retrospective study                                       | 6 children with ROHHAD syndrome                            | 4.7 - 10 yrs  | 1 died<br>5/6 treated with BPAP                                                          |  |
| Padman et al. [49]    | USA              | Clin Pediatr        | Retrospective study on effect of BPAP on sleep parameters | 10 children with OSA                                       | 3 - 18 yrs    | All treated with BPAP: 3 craniofacial malformation, 1 NMD, 6 obesity<br>8 continued BPAP |  |

|                          |           |                                |                                                 |                                                                                |                   |                                                                                                                   |                                                                                                       |
|--------------------------|-----------|--------------------------------|-------------------------------------------------|--------------------------------------------------------------------------------|-------------------|-------------------------------------------------------------------------------------------------------------------|-------------------------------------------------------------------------------------------------------|
| Pellen et al. [50]       | Australia | Int J Pediatr Otorhinolaryngol | Retrospective study                             | 16 infants with congenital tracheal stenosis                                   | 0 – 9 m           | All treated with NIV pre- post operative, age at start 1 – 6 m, duration 1 – 24 m, 2 (20%) discharged home on NIV |                                                                                                       |
| Archangelidi et al. [51] | UK        | J Cystic Fibrosis              | Data from UK cystic fibrosis registry 2007-2015 | 1107/11079 (10%) patients with cystic fibrosis had at least on record with NIV | Children + adults | For children (only): Median age at NIV initiation 13.5 yrs                                                        | NIV associated with increased risk of death/transplant 16% of children with NIV died during follow up |

Abbreviations: m: months, yrs: years, SMA: spinal muscular atrophy, ARF: acute respiratory failure, NIV: noninvasive ventilation, MI-E: mechanical insufflation-exsufflation, IV: invasive ventilation, NMD: neuromuscular disease, CCHS: congenital central hypoventilation syndrome, BPAP: bilevel positive airway pressure, ROHHAD syndrome: rapid-onset obesity with hypoventilation, hypothalamic dysfunction, and autonomic dysregulation (ROHHAD) syndrome, OSA: obstructive sleep apnea.

## References

1. Birnkrant DJ, Pope JF, Martin JE, *et al.* Treatment of type I spinal muscular atrophy with noninvasive ventilation and gastrostomy feeding. *Pediatr Neurol* 1998; 18: 407-410.
2. Bach JR, Niranjan V, Weaver B. Spinal muscular atrophy type 1: A noninvasive respiratory management approach. *Chest* 2000; 117: 1100-1105.
3. Bach JR, Baird JS, Plosky D, *et al.* Spinal muscular atrophy type 1: management and outcomes. *Pediatr Pulmonol* 2002; 34: 16-22.
4. Bach JR, Bianchi C. Prevention of pectus excavatum for children with spinal muscular atrophy type 1. *Am J Phys Med Rehabil* 2003; 82: 815-819.
5. Bach JR, Saltstein K, Sinqee D, *et al.* Long-term survival in Werdnig-Hoffmann disease. *Am J Phys Med Rehabil* 2007; 86: 339-345.

6. Lemoine TJ, Swoboda KJ, Bratton SL, *et al.* Spinal muscular atrophy type 1: are proactive respiratory interventions associated with longer survival? *Pediatr Crit Care Med* 2012; 13: e161-165.
7. Chatwin M, Bush A, Simonds AK. Outcome of goal-directed non-invasive ventilation and mechanical insufflation/exsufflation in spinal muscular atrophy type I. *Arch Dis Child* 2011; 96: 426-432.
8. Ottonello G, Mastella C, Franceschi A, *et al.* Spinal muscular atrophy type 1: avoidance of hospitalization by respiratory muscle support. *Am J Phys Med Rehabil* 2011; 90: 895-900.
9. Gregoret C, Ottonello G, Chiarini Testa MB, *et al.* Survival of patients with spinal muscular atrophy type 1. *Pediatrics* 2013; 131: e1509-e1514.
10. Pane M, Palermo C, Messina S, *et al.* An observational study of functional abilities in infants, children, and adults with type 1 SMA. *Neurology* 2018; 91: e696-e703.
11. Ioos C, Leclair-Richard D, Mrad S, *et al.* Respiratory capacity course in patients with infantile spinal muscular atrophy. *Chest* 2004; 126: 831-837.
12. Mellies U, Dohna-Schwake C, Stehling F, *et al.* Sleep disordered breathing in spinal muscular atrophy. *Neuromuscul Disord* 2004; 14: 797-803.
13. Vasconcelos M, Fineza I, Felix M, *et al.* Spinal muscular atrophy--noninvasive ventilatory support in pediatrics. *Rev Port Pneumol* 2005; 11: 443-455.
14. Han YJ, Park JD, Lee B, *et al.* Home mechanical ventilation in childhood-onset hereditary neuromuscular diseases: 13 years' experience at a single center in Korea. *PLoS One* 2015; 30: e0122346.
15. Kapur N, Deegan S, Parakh A, *et al.* Relationship between respiratory function and need for NIV in childhood SMA. *Pediatr Pulmonol* 2019; 54: 1774-1780.
16. Markstrom A, Sundell K, Stenberg N, *et al.* Long-term non-invasive positive airway pressure ventilation in infants. *Acta Paediatr* 2008; 97: 1658-1662.
17. Ishikawa Y, Miura T, Ishikawa Y, *et al.* Duchenne muscular dystrophy: survival by cardio-respiratory interventions. *Neuromuscul Disord* 2011; 21: 47-51.
18. Mellies U, Ragette R, Dohna Schwake C, *et al.* Long-term noninvasive ventilation in children and adolescents with neuromuscular disorders. *Eur Respir J* 2003; 22: 631-636.
19. Mellies U, Ragette R, Schwake C, *et al.* Sleep-disordered breathing and respiratory failure in acid maltase deficiency. *Neurology* 2001; 57: 1290-1295.
20. Nabatame S, Taniike M, Sakai N, *et al.* Sleep disordered breathing in childhood-onset acid maltase deficiency. *Brain Dev* 2009; 31: 234-239.
21. Suresh S, Wales P, Dakin C, *et al.* Sleep-related breathing disorder in Duchenne muscular dystrophy: disease spectrum in the paediatric population. *J Paediatr Child Health* 2005; 41: 500-503.

22. Khan Y, Heckmatt JZ, Dubowitz V. Sleep studies and supportive ventilatory treatment in patients with congenital muscle disorders. *Arch Dis Child* 1996; 74: 195-200.
23. Katz SL, Gaboury I, Keilty K, *et al.* Nocturnal hypoventilation: predictors and outcomes in childhood progressive neuromuscular disease. *Arch Dis Child* 2010; 95: 998-1003.
24. Kherani T, Sayal A, Al-Saleh S, *et al.* A comparison of invasive and noninvasive ventilation in children less than 1 year of age: A long-term follow-up study. *Pediatr Pulmonol* 2016; 51: 189-195.
25. Simonds AK, Ward S, Heather S, *et al.* Outcome of paediatric domiciliary mask ventilation in neuromuscular and skeletal disease. *Eur Respir J* 2000; 16: 476-481.
26. Wallis C, Paton JY, Beaton S, *et al.* Children on long-term ventilatory support: 10 years of progress. *Arch Dis Childh* 2011; 96: 998-1002.
27. Sato T, Murakami T, Ishiguro K, *et al.* Respiratory management of patients with Fukuyama congenital muscular dystrophy. *Brain Dev* 2016; 38: 324-330.
28. Nadeau A, Kinali M, Main M, *et al.* Natural history of Ullrich congenital muscular dystrophy. *Neurology* 2009; 73: 25-31.
29. Yonekawa T, Komaki H, Okada M, *et al.* Rapidly progressive scoliosis and respiratory deterioration in Ullrich congenital muscular dystrophy. *J Neurol Neurosurg Psychiatry* 2013; 84: 982-988.
30. Quijano-Roy S, Khirani S, Colella M, *et al.* Diaphragmatic dysfunction in Collagen VI myopathies. *Neuromuscul Disord* 2014; 24: 125-133.
31. Muntoni F, Taylor J, Sewry CA, *et al.* An early onset muscular dystrophy with diaphragmatic involvement, early respiratory failure and secondary alpha2 laminin deficiency unlinked to the LAMA2 locus on 6q22. *Eur J Paediatr Neurol* 1998; 2: 19-26.
32. Scoto M, Cirak S, Mein R, *et al.* SEPN1-related myopathies: clinical course in a large cohort of patients. *Neurology* 2011; 76: 2073-2078.
33. Schara U, Kress W, Bonnemann CG, *et al.* The phenotype and long-term follow-up in 11 patients with juvenile selenoprotein N1-related myopathy. *Eur J Paediatr Neurol* 2008; 12: 224-230.
34. Caggiano S, Khirani S, Dabaj I, *et al.* Diaphragmatic dysfunction in SEPN1-related myopathy. *Neuromuscul Disord* 2017; 27: 747-755.
35. Caggiano S, Khirani S, Verrillo E, *et al.* Sleep in infants with congenital myasthenic syndromes. *Eur J Paediatr Neurol* 2017; 21: 842-851.
36. Payo J, Perez-Gruoso FS, Fernandez-Baillo N, *et al.* Severe restrictive lung disease and vertebral surgery in a pediatric population. *Eur Spine J* 2009; 18: 1905-1910.
37. Kirk VG, Morielli A, Gozal D, *et al.* Treatment of sleep-disordered breathing in children with myelomeningocele. *Pediatr Pulmonol* 2000; 30: 445-452.
38. Nashed A, Al-Saleh S, Gibbons J, *et al.* Sleep-related breathing in children with mucopolysaccharidosis. *J Inherited Metabol Dis* 2009; 32: 544-550.
39. Tibballs J, Henning RD. Noninvasive ventilatory strategies in the management of a newborn infant and three children with congenital central hypoventilation syndrome. *Pediatr Pulmonol* 2003; 36: 544-548.
40. Vanderlaan M, Holbrook CR, Wang M, *et al.* Epidemiologic survey of 196 patients with congenital central hypoventilation syndrome. *Pediatr Pulmonol* 2004; 37: 217-229.

41. Hasegawa H, Kawasaki K, Inoue H, *et al.* Epidemiologic survey of patients with congenital central hypoventilation syndrome in Japan. *Pediatr Int* 2012; 54: 123-126.
42. Diep B, Wang A, Kun S, *et al.* Diaphragm pacing without tracheostomy in Congenital Central Hypoventilation Syndrome patients. *Respiration* 2015; 89: 534-538.
43. Facchina G, Amaddeo A, Baujat G, *et al.* A retrospective study on sleep-disordered breathing in Morquio-A syndrome. *Am J Med Genet A* 2018; 176: 2595-2603.
44. Tabone L, Caillaud C, Amaddeo A, *et al.* Sleep-disordered breathing in children with mucopolidosis. *Am J Med Genet A* 2019; 179: 1196-1204.
45. Dudoignon B, Amaddeo A, Frapin A, *et al.* Obstructive sleep apnea in Down syndrome: Benefits of surgery and noninvasive respiratory support. *Am J Med Genet A* 2017; 173: 2074-2080.
46. Clift S, Dahlitz M, Parkes JD. Sleep apnoea in the Prader-Willi syndrome. *J Sleep Res* 1994; 3: 121-126.
47. Pavone M, Caldarelli V, Khirani S, *et al.* Sleep disordered breathing in patients with Prader-Willi syndrome: A multicenter study. *Pediatr Pulmonol* 2015; 50: 1354-1359.
48. Reppucci D, Hamilton J, Yeh EA, *et al.* ROHHAD syndrome and evolution of sleep disordered breathing. *Orphanet J Rare Dis* 2016; 11: 106.
49. Padman R, Hyde C, Foster P, *et al.* The pediatric use of bilevel positive airway pressure therapy for obstructive sleep apnea syndrome: a retrospective review with analysis of respiratory parameters. *Clin Pediatr* 2002; 41: 163-169.
50. Pellen G, Pandit C, Castro C, *et al.* Use of non-invasive ventilation in children with congenital tracheal stenosis. *Int J Pediatr Otorhinolaryngol* 2019; 127: 109672.
51. Archangelidi O, Carr SB, Simmonds NJ, *et al.* Non-invasive ventilation and clinical outcomes in cystic fibrosis: Findings from the UK CF registry. *J Cyst Fibros* 2019; 18: 665-670.
