# Supplementary material
Source: HighWire-hosted journal article supplement (https://erj.ersjournals.com/content/59/6/2101404)
Supplement: inline-supplementary-material-4 [file inline-supplementary-material-4.pdf]

**Online Table S2.3:** Longitudinal (local/regional/national) surveys

| Author             | Country     | Journal                | Study type & dates                           | Number of patients                              | Ages     | Disorders                                                                                                         | Comments                              |
|--------------------|-------------|------------------------|----------------------------------------------|-------------------------------------------------|----------|-------------------------------------------------------------------------------------------------------------------|---------------------------------------|
| Fauroux et al. [1] | France      | Eur Respir J           | 1992-1933                                    | 287 children treated at home with O2, IV or NIV | < 18 yrs | 153 children treated with NIV (24 cystic fibrosis, 87 NMD, 21 thoracic deformity)<br>5 children treated with CPAP |                                       |
| Jardine et al. [2] | UK          | BMJ                    | Cross-sectional survey, 1997, questionnaires | 141 children                                    | < 16 yrs | NIV or IV home: 52 NMD, 13 CCHS, 10 spinal injury, 9 craniofacial syndrome, 1 BPD, 8 other                        | 52/141 treated at home with NIV       |
| Kamm et al. [3]    | Switzerland | Swiss Medical Weekly   | Postal questionnaires                        | 32 children (7 centres)                         | < 16 yrs | 41% CCHS, 41% NMD, 6% craniofacial                                                                                | 19 NIV, 2 phrenic nerve pacing        |
| Resener et al. [4] | Brazil      | J Pediatr (Rio J)      | April 1997-June 1998                         | 26 children                                     | 1-21 yrs | No detail on NIV: 15 NMD, 8 central sleep apnea, 3 obstructive lung disease                                       |                                       |
| Fauroux et al. [5] | France      | Pediatr Pulmonol       | Cross-sectional national study, July 2000    | 102 children                                    | 0-18 yrs | 35 NMD, 31 OSA, 17 cystic fibrosis, 9 CCHS, 8 scoliosis, 2 spina bifida, 1 encephalopathy                         | Only NIV                              |
| Edwards et al. [6] | Australia   | J Pediatr Child Health | Retrospective survey at 1 center 1991-2004   | 108 treated with CPAP and 47 with NIV           | 0-17 yrs | 17 NMD, 6 CNS, 2 CCHS, 2 mucopolysaccharidosis, 39 OSA, 11 cyphoscoliosis, 10 obesity, 5 airway                   | 108 treated with CPAP and 47 with NIV |

|                     |                   |                        |                                                   |                                                 |                        |                                                                                                                                                                                 |                                                                                                           |
|---------------------|-------------------|------------------------|---------------------------------------------------|-------------------------------------------------|------------------------|---------------------------------------------------------------------------------------------------------------------------------------------------------------------------------|-----------------------------------------------------------------------------------------------------------|
|                     |                   |                        |                                                   |                                                 |                        | malacia, 2 cystic fibrosis, 2 BPD, 5 bronchiectasis, 2 achondroplasia, 2 Down syndrome, 1 craniofacial syndrome, 24 other                                                       |                                                                                                           |
| Graham et al. [7]   | USA               | Pediatrics             | Retrospective survey in 1995 in the Massachusetts | 197 children having chronic ventilatory support | For NIV 10.3 ± 6.6 yrs | 98 treated with CPAP or BPAP: 55 NMD or CNS, 2 spinal cord injury, 6 BPD, 21 upper airway, 9 other<br>2 treated with negative pressure                                          |                                                                                                           |
| Oktem et al. [8]    | Turkey (Istanbul) | Respiration            | Longitudinal (2001-2006), 1 center in Istanbul    | 34 children                                     | 4 mo-17 yrs            | For NIV: 18 BPD or airway problems, 3 NMD, (7 died)                                                                                                                             | 23 NIV (11 IV)                                                                                            |
| Pekcan et al. [9]   | Turkey            | Turkish J Pediatr      | Retrospective study in one center (4 yrs ?)       | 27 children on home MV: IV and NIV (no numbers) | 0 - 15 yrs             | 16 NMD, 6 lung disease, 3 congenital heart disease, 2 storage disease<br>No information on those on IV and NIV                                                                  |                                                                                                           |
| Tibbals et al. [10] | Australia         | J Pediatr Child Health | Longitudinal (1979-2008), 1 center in Melbourne   | 168 children                                    | 3 w-19 yrs             | No distinction IV vs NIV:<br>55 (32%) OSA, 42 NMD (25%), 23 (14%) tracheobronchomalacia, 20 (12%) cerebral palsy or scoliosis, 7 (4%) CCHS, 7 (4%) other central sleep apnea, + | 58 CPAP, 50 BPAP, 48 tracheotomy, 5 phrenic nerve stimulation, 4 negative pressure, 3 nasopharyngeal tube |

|                     |         |                  |                                                 |                                                         |              |                                                                                                                                                                                                                     |                            |
|---------------------|---------|------------------|-------------------------------------------------|---------------------------------------------------------|--------------|---------------------------------------------------------------------------------------------------------------------------------------------------------------------------------------------------------------------|----------------------------|
|                     |         |                  |                                                 |                                                         |              | other                                                                                                                                                                                                               |                            |
| Goodwin et al. [11] | UK (SW) | Eur J Pediatr    | Retrospective survey 1994-2009 South West of UK | 106 children treated with home ventilation (IV and NIV) | < 18 yrs     | 63/106 treated with NIV:31 NMD, 21 upper airway, 9 CNS, 2 lung disease (no mention CPAP vs NIV)                                                                                                                     |                            |
| Racca et al. [12]   | Italy   | Pediatr Pulmonol | Postal questionnaires, NIV on January 2007      | 362 children                                            | 8-13 yrs     | 112 NMD, 52 BPD + upper airway, 17 encephalopathy, 19 central sleep apnea, 12 chest wall anomaly, 1 spinal cord injury                                                                                              | 213 NIV                    |
| Wallis et al. [13]  | UK      | Arch Dis Child   | Electronic based national questionnaire         | 933 children                                            | < 17 yrs     | 25 CCHS, 47 other central sleep apnea, 6 cerebral palsy, 88 Duchenne, 69 SMA, 90 other NMD, 9 scoliosis, 14 BPD, 13 airway malacia, 58 Prader Will/obesity, 153 upper airway obstruction, 5 cystic fibrosis + other | 704 (75%) NIV              |
| Sovtic et al. [14]  | Serbia  | Pediatr Int      | Longitudinal (2001-2011) in 1 center (Belgrade) | 29 children                                             | 0.4-17.3 yrs | 7 NMD, 4 cystic fibrosis, 5 OSA, 2 scoliosis or CCHS                                                                                                                                                                | 18 NIV                     |
| Hsia et al. [15]    | Taiwan  | Pediatr Neonatol | Retrospective study in Taiwan                   | 139 children                                            | 3m - 18 yrs  | 72% NMD, 14% airway/lung dysfunction, 12% metabolic/genetic                                                                                                                                                         | Only 3/139 children on NIV |

|                         |                    |                         |                                                           |                                           |                |                                                                                                                                                 |                                                  |
|-------------------------|--------------------|-------------------------|-----------------------------------------------------------|-------------------------------------------|----------------|-------------------------------------------------------------------------------------------------------------------------------------------------|--------------------------------------------------|
|                         |                    |                         |                                                           |                                           |                | anomaly                                                                                                                                         |                                                  |
| McDougall et al. [16]   | Canada (Vancouver) | Arch Dis Child          | Longitudinal (1995-2009), 1 center in Vancouver           | 144 children started on NIV               | 0-18 yrs       | Decrease in NMD, increase in craniofacial/OSA                                                                                                   | 116 (81%) NIV, 22 CPAP, 94 BPAP, increase in NIV |
| Pavone et al. [17]      | Italy (Rome)       | Early Hum Development   | 1993-2012                                                 | Increase from 1 pt in 1993 to 100 in 2012 | ?              | 52 SMA, 26 other NMD, 15 cystic fibrosis, 30 obesity, 7 cerebral palsy, 21 Prader Willi syndrome, 17 encephalopathy, 6 CCHS + ROHHAD, 46 others | Only NIV                                         |
| Amin et al. [18]        | Canada (Toronto)   | Pediatr Pulmonol        | Longitudinal (1991-2011) in 1 center (Sick Kids Hospital) | 379 children identified                   |                | 35% musculoskeletal<br>36% respiratory disorders                                                                                                | 313 NIV: increase 2x in IV, x10 in NIV           |
| Preutthipan et al. [19] | Thailand           | Curr Pediatr Rep        | Retrospective data from 1 center                          | 148 children                              | 0-19 yrs       | 48% OSA, 15% NMD                                                                                                                                | 64% NIV                                          |
| Gupta et al. [20]       | Nepal              | J Nepal Pediatr Society | Longitudinal (2001-2012) in 1 center                      | 24 children                               | ?              | ?                                                                                                                                               | 4 NIV                                            |
| Cancelinha et al. [21]  | Portugal           | Rev Port Pneumol        | Retrospective data from 1 center                          | 31 children                               | 0 - 13 yrs     | 39% NMD, 23% metabolic disease, 19% central hypoventilation                                                                                     | NIV in 27 children                               |
| Han et al. [22]         | Korea              | PlosOne                 | Longitudinal (2001-2012) in 1 center (Seoul)              | 57 children with NMD                      |                | No diagnosis for the NIV patients                                                                                                               | Only 9 NIV with 8 at home                        |
| Park et al. [23]        | Korea              | J Korean Med Sci        | Data from the National                                    | 416 children                              | < 19 yrs, mean | IV: 202 (49%)<br>NIV (51%): 146 NMD,                                                                                                            |                                                  |

|                     |             |                  |                                                             |                                   |                                         |                                                                                                                                                            |                                       |
|---------------------|-------------|------------------|-------------------------------------------------------------|-----------------------------------|-----------------------------------------|------------------------------------------------------------------------------------------------------------------------------------------------------------|---------------------------------------|
|                     |             |                  | Health Insurance service in 2016                            | Prevalence 4.4/100000 children    | age 6 yrs                               | 46 CNS, 25 cardiopulmonary                                                                                                                                 |                                       |
| Chatwin et al. [24] | UK (London) | PlosOne          | Longitudinal (1993-2011) in 1 center (Royal Brompton)       | 496 children started on home NIV  | < 17 yrs<br>59 < 1 yr                   | 56% NMD, 14% congenital syndrome, 9% upper airway anomaly, 5% BPD, 4% chest wall disease, 3% obesity, 3% central sleep apnea, 2% cardiac surgery, 4% other | Only NIV                              |
| Walsh et al. [25]   | Ireland     | Irish Med J      | Questionnaires to pediatricians                             | Not available                     | ??                                      | Not available                                                                                                                                              | Increase in NIV but no details        |
| Rose et al. [26]    | Canada      | Respir Care      | National web survey for home providers (2012-2013)          | 4334 ventilator-assisted patients | Adults and children, 425 (21%) < 18 yrs | Children: 30% muscular dystrophy, 30% central hypoventilation, 12% obesity, 10% chest wall, 6% neurological disease, 6% other                              | 73% NIV                               |
| Weiss et al. [27]   | Austria     | Klin Pediatr     | National cross-sectional study (questionnaire) on June 2013 | 143                               | 143, 111 (78%) < 18 yrs                 | 44% NMD, 19% other NMD, 9% central sleep apnea, 8% OSA, 8% thorax and spinal disease, 5% lung disease, 6% other                                            | 95/143 on NIV, 6% CPAP                |
| Nathan et al. [28]  | Malaysia    | Pediatr Pulmonol | Longitudinal study in 1 center (2001-2014)                  | 70 (2 pts in 2001 to 47 in 2014)  | 1.1 - 11 yrs for NIV                    | 32 lung disease, 5 upper airway, 7 NMD, 4 chest/spine disease, 1 cardiac, 1 central sleep                                                                  | 60 patients on NIV: 30 CPAP + 30 BPAP |

|                            |              |                                  |                                                                      |              |              |                                                                                                                                                            |                                |
|----------------------------|--------------|----------------------------------|----------------------------------------------------------------------|--------------|--------------|------------------------------------------------------------------------------------------------------------------------------------------------------------|--------------------------------|
|                            |              |                                  |                                                                      |              |              | apnea, 5 spinal cord injury                                                                                                                                |                                |
| Chau et al. [29]           | Hong Kong    | Respir Care                      | Longitudinal study in 1 center (1997-2015)                           | 96 patients  | < 21 yrs     | NIV: 40 NMD, 13 upper airway anomaly, 6 BPD, 1 chest wall deformity, 11 central sleep apnea + metabolic + neurological + genetic disorder                  | 71 NIV (34%): 16 CPAP, 55 BPAP |
| Van der Poel et al. [30]   | South Africa | Pediatr Allergy Immunol Pulmonol | Retrospective study in 1 center                                      | 55 children  | 3 m - 18 yrs | 60% NMD                                                                                                                                                    | 16 (29%) NIV                   |
| Ikedo et al. [31]          | Japan        | Brain Development                | Longitudinal study in 1 center (2001-2015)                           | 53 patients  | < 20 yrs     | 36 NMD, 23 congenital anomaly, 17 metabolic disease, 11 perinatal disorder, and other                                                                      | All NIV                        |
| Castro-Codesal et al. [32] | Canada       | PlosOne                          | Retrospective multicenter cohort (2005-2014) in Alberta: x6 increase | 622 children | < 18 yrs     | 371 (60%) upper airway, 107 (17%) CNS, 93 (15%) musculoskeletal and NMD, 39 (6%) cardiorespiratory disease, 12 (2%) other                                  | All NIV: 75% CPAP, 22% BPAP    |
| Leske et al. [33]          | Argentina    | Pediatr Pulmonol                 | Longitudinal study in 1 center (2007-2018) Buenos Aires              | 244 children | 3 - 14 yrs   | No distinction IV vs NIV: 105 (43%) NMD, 56 (23%) genetic sd (achondroplasia, Prader Willi syndrome, craniostenosis, mucopolysaccharidosis, Down syndrome, | 210 (86%) NIV: 21% CPAP        |

|                     |      |                                   |                                 |             |              |                                                                 |              |
|---------------------|------|-----------------------------------|---------------------------------|-------------|--------------|-----------------------------------------------------------------|--------------|
|                     |      |                                   |                                 |             |              | Treacher Collins, 18 obesity, 11 CCHS 4 BPD, 4 ROHHAD, 17 other |              |
| Hassani et al. [34] | Iran | Anestezjologia Intensywna Terapia | Retrospective study in 1 center | 67 children | 2 m – 15 yrs | 45% lung disease, 31% NMD, 13% metabolic disease                | 62 (93%) NIV |

Abbreviations: IV: invasive ventilation, NIV: noninvasive ventilation, CPAP: continuous positive airway pressure, BPAP: bilevel positive airway pressure, NMD: neuromuscular disease, SMA: spinal muscular atrophy, OSA: obstructive sleep apnea, CCHS: central congenital hypoventilation syndrome, BPD: bronchopulmonary dysplasia, CNS: central nervous system, ROHHAD syndrome: rapid-onset obesity with hypoventilation, hypothalamic dysfunction, and autonomic dysregulation syndrome.

## References

1. Fauroux B, Sardet A, Foret D. Home treatment for chronic respiratory failure in children: a prospective study. *Eur Respir J* 1995; 8: 2062-2066.
2. Jardine E, O'Toole M, Paton JY, *et al.* Current status of long term ventilation of children in the United Kingdom: questionnaire survey. *BMJ* 1999; 318: 295-299.
3. Kamm M, Burger R, Rimensberger P, *et al.* Survey of children supported by long-term mechanical ventilation in Switzerland. *Swiss Medical Weekly* 2001; 131: 261-266.
4. Resener TD, Martinez FE, Reiter K, *et al.* Home ventilation of pediatric patients - description of a program. *J Pediatr (Rio J)* 2001; 77: 84-88.
5. Fauroux B, Boffa C, Desguerre I, *et al.* Long-term noninvasive mechanical ventilation for children at home: a national survey. *Pediatr Pulmonol* 2003; 35: 119-125.
6. Edwards EA, Hsiao K, Nixon GM. Paediatric home ventilatory support: the Auckland experience. *J Paediatr Child Health* 2005; 41: 652-658.
7. Graham RJ, Fleegler EW, Robinson WM. Chronic ventilator need in the community: a 2005 pediatric census of Massachusetts. *Pediatrics* 2007; 119: e1280-e1287.
8. Oktem S, Ersu R, Uyan ZS, *et al.* Home ventilation for children with chronic respiratory failure in Istanbul. *Respiration* 2008; 76: 76-81.
9. Pekcan S, Aslan AT, Kiper N, *et al.* Home mechanical ventilation: outcomes according to remoteness from health center and different family education levels. *Turkish J Pediatr* 2010; 52: 267-273.

10. Tibballs J, Henning R, Robertson CF, *et al.* A home respiratory support programme for children by parents and layperson carers. *J Paediatr Child Health* 2010; 46: 57-62.
11. Goodwin S, Smith H, Langton Hewer S, *et al.* Increasing prevalence of domiciliary ventilation: changes in service demand and provision in the South West of the UK. *Eur J Pediatr* 2011; 170: 1187-1192.
12. Racca F, Berta G, Sequi M, *et al.* Long-term home ventilation of children in Italy: a national survey. *Pediatr Pulmonol* 2011; 46: 566-572.
13. Wallis C, Paton JY, Beaton S, *et al.* Children on long-term ventilatory support: 10 years of progress. *Arch Dis Childh* 2011; 96: 998-1002.
14. Sovtic A, Minic P, Vukcevic M, *et al.* Home mechanical ventilation in children is feasible in developing countries. *Pediatr Int* 2012; 54: 676-681.
15. Hsia SH, Lin JJ, Huang IA, *et al.* Outcome of long-term mechanical ventilation support in children. *Pediatr Neonatol* 2012; 53: 304-308.
16. McDougall CM, Adderley RJ, Wensley DF, *et al.* Long-term ventilation in children: longitudinal trends and outcomes. *Arch Dis Child* 2013; 98: 660-665.
17. Pavone M, Verrillo E, Caldarelli V, *et al.* Non-invasive positive pressure ventilation in children. *Early Hum Dev* 2013; 89: S25-S31.
18. Amin R, Sayal P, Syed F, *et al.* Pediatric long-term home mechanical ventilation: twenty years of follow-up from one Canadian center. *Pediatr Pulmonol* 2014; 49: 816-824.
19. Preutthipan A, Nugboon M, Chaisupamongkollarp T, *et al.* An economic approach for children with chronic ventilatory support. *Curr Pediatr Rep* 2014; 2: 1-8.
20. Gupta D, Sachdev A, Gupta N, *et al.* Home ventilation in children. *J Nepal Paediatr Society* 2015; 35: 85-88.
21. Cancelinha C, Madureira N, Mação P, *et al.* Long-term ventilation in children: ten years later. *Rev Port Pneumol* 2006; 21: 16-21.
22. Han YJ, Park JD, Lee B, *et al.* Home mechanical ventilation in childhood-onset hereditary neuromuscular diseases: 13 years' experience at a single center in Korea. *PLoS One* 2015; 30: e0122346.
23. Park M, Jang H, Suk Sol I, *et al.* Pediatric home mechanical ventilation in Korea: the present situation and future strategy. *J Korean Med Sci* 2019; 34: e268.
24. Chatwin M, Tan HL, Bush A, *et al.* Long term non-invasive ventilation in children: impact on survival and transition to adult care. *PLoS One* 2015; 10: e0125839.
25. Walsh A, Phelan F, Phelan M, *et al.* Diagnosis and treatment of sleep related breathing disorders in children: 2007 to 2011. *Irish Med J* 2015; 108: 71-73.
26. Rose L, McKim DA, Katz SL, *et al.* Home mechanical ventilation in Canada: a national survey. *Respir Care* 2015; 60: 695-704.
27. Weiss S, Van Egmond-Frohlich A, Hofer N, *et al.* Long-term respiratory support for children and adolescents in Austria: A national survey. *Klinische Padiatrie* 2016; 228: 42-46.
28. Nathan AM, Loo HY, de Bruyne JA, *et al.* Thirteen years of invasive and noninvasive home ventilation for children in a developing country: A retrospective study. *Pediatr Pulmonol* 2017; 52: 500-507.



29. Chau SK, Yung AW, Lee SL. Long-term management for ventilator-assisted children in Hong Kong: 2 decades' experience. *Respir Care* 2017; 62: 54-64.
30. van der Poel LAJ, Booth J, Argent A, *et al.* Home ventilation in South African children: does socioeconomic factors matter? *Pediatr Allergol Immunol Pulmonol* 2017; 30: 163-170.
31. Ikeda A, Tsuji M, Goto T, *et al.* Long-term home non-invasive positive pressure ventilation in children: Results from a single center in Japan. *Brain Dev* 2018; 40: 558-565.
32. Castro-Codezal ML, Dehaan K, Bedi PK, *et al.* Longitudinal changes in clinical characteristics and outcomes for children using long-term non-invasive ventilation. *PLoS One* 2018; 13: e0192111.
33. Leske V, Guerdile MJ, Gonzalez A, *et al.* Feasibility of a pediatric long-term home ventilation program in Argentina: 11 years' experience. *Pediatr Pulmonol* 2020; 55: 780-787.
34. Hassani SA, Navaei S, Shirzadi R, *et al.* Cost-effectiveness of home mechanical ventilation in children living in a developing country. *Anaesthesiol Intensive Ther* 2019; 51: 35-40.
