# Supplementary material
Source: HighWire-hosted journal article supplement (https://erj.ersjournals.com/content/59/6/2101404)
Supplement: inline-supplementary-material-5 [file inline-supplementary-material-5.pdf]

**Online Table S3.1:** Initiation criteria and location for CPAP or NIV initiation

| Author             | Country | Journal          | Type of study                                          | Number of patients           | Ages       | Initiation scenario/criteria                                                                                                                                                                                                                                                                                                                                          | Location of CPAP/NIV initiation                                                                    |
|--------------------|---------|------------------|--------------------------------------------------------|------------------------------|------------|-----------------------------------------------------------------------------------------------------------------------------------------------------------------------------------------------------------------------------------------------------------------------------------------------------------------------------------------------------------------------|----------------------------------------------------------------------------------------------------|
| Padman et al. [1]  | USA     | Pediatr Pulmonol | Retrospective study                                    | 15 children: 4 CF and 11 NMD | 4 – 21 yrs | ARF in children with CRF: avoidance of intubation (1 failure in one patient with NMD)<br>Duration of BPAP: 1 day to 21 mo                                                                                                                                                                                                                                             | BPAP initiated in the ICU in all patients                                                          |
| Fauroux et al. [2] | France  | Pediatr Pulmonol | Cross sectional national study in 1999 (questionnaire) | 102 patients                 | < 18 yrs   | Criteria (not exclusive, no details):<br>67% SDB symptoms<br>28% nocturnal hypoventilation<br>21% failure to thrive<br>18% other symptoms<br>82% nocturnal SpO <sub>2</sub><br>9% PtcO <sub>2</sub> /PtcCO <sub>2</sub><br>88% ABG<br>63% sleep study<br>56% lung function data<br>31% echocardiography data                                                          | All during a hospitalisation                                                                       |
| Oktem et al. [3]   | Turkey  | Respiration      | Retrospective study at 1 center 2001-2006              | 34                           | 4 m-17 yrs | Criteria:<br>1) hypoventilation: hypoxemia + hypercapnia: daytime hypoxemia < 3 SD, nocturnal hypoxemia SpO <sub>2</sub> < 90% for >5% night, PHT, hypercapnia PaCO <sub>2</sub> > 45 mmHg.<br>Indications for NIV:<br>Symptoms of SDB or other symptoms (dyspnea, right heart failure, PHT, transition from tracheotomy)<br>No details for the patients in the study | All during a hospitalisation, median duration 64 (3-180) days (due to delay to have the equipment) |

|                     |        |                       |                                                                         |                             |              |                                                                                                                                                                                                                                                                                                              |                                                                                   |
|---------------------|--------|-----------------------|-------------------------------------------------------------------------|-----------------------------|--------------|--------------------------------------------------------------------------------------------------------------------------------------------------------------------------------------------------------------------------------------------------------------------------------------------------------------|-----------------------------------------------------------------------------------|
| McDougal et al. [4] | Canada | Arch Dis Child        | Prospective longitudinal study in 1 center 1995-2009                    | 144 children                | < 18 yrs     | 28 failure to wean from ventilation<br>31 ARF<br>40 sleep study results (not specified)<br>23 SDB symptoms<br>9 vital capacity < 20%<br>10 other                                                                                                                                                             | Not specified                                                                     |
| Amin et al. [5]     | Canada | Pediatr Pulmonol      | Retrospective study at 1 center 1991-2011                               | 313 treated with NIV        |              |                                                                                                                                                                                                                                                                                                              | 27% in pediatric ICU<br>70% in sleep lab<br>3% in-patient ward                    |
| Rose et al. [6]     | Canada | Respir Care           | Web based questionnaire to home care providers 2012-2013                | 4334 adults & children      | 425 < 18 yrs | Considerable variation in criteria (adults + children):<br>57% nocturnal hypoventilation on PSG<br>38% daytime hypercapnia<br>32% nocturnal hypercapnia<br>31% never used daytime hypercapnia<br>11% never had PSG                                                                                           | All in hospital: sleep lab (38%), ICU (27%), in-patient units (21%)               |
| Chatwin et al. [7]  | UK     | PlosOne               | Retrospective study at 1 center 1993-2011                               | 496 children started on NIV | < 17 yrs     | NIV initiated if 1) chronic daytime PaCO <sub>2</sub> > 6.5 kPa (alone), 2) PSG: nocturnal PtcCO <sub>2</sub> > 6.5 kPa for > 50% night time<br>CPAP initiated when normal PCO <sub>2</sub> with elevated AHI (not specified)<br>340 (76%) started as in-patients with 67 (15%) started in the pediatric ICU | 340 (71%) started as in-patients with 67 (15%) being started in the pediatric ICU |
| Edwards et al. [8]  | USA    | Pediatr Crit Care Med | Retrospective cross-sectional analysis among 73 pediatric ICU 2009-2011 | 115437 PICU patients        | ?            | 381 (0.3%) initiated on long term NIV (16% on CPAP), 16% were discharged to a chronic care<br>Disorders: 11% endocrinologic, 15% gastroenterologic, 11% metabolic, 31% epilepsy, 23% cerebral palsy, 34% NMD, 22% encephalopathy, 34%                                                                        |                                                                                   |

|                    |          |                     |                                                 |                                                    |               |                                                                                                                                                                                                                                      |                                                                                                                                                                                                                                                                                                     |
|--------------------|----------|---------------------|-------------------------------------------------|----------------------------------------------------|---------------|--------------------------------------------------------------------------------------------------------------------------------------------------------------------------------------------------------------------------------------|-----------------------------------------------------------------------------------------------------------------------------------------------------------------------------------------------------------------------------------------------------------------------------------------------------|
|                    |          |                     |                                                 |                                                    |               | scoliosis, 27% OSA                                                                                                                                                                                                                   |                                                                                                                                                                                                                                                                                                     |
| Amaddeo et al. [9] | France   | Pediatr Pulmonol    | Retrospective study                             | 76 children started on CPAP (64) or NIV 12) / 1 yr | 0.3 -19.5 yrs | 3 scenarios:<br>acute (CPAP/NIV weaning failure in pediatric ICU, n=15),<br>subacute on abnormal overnight gas exchange (n=18) or<br>chronic on a sleep study (n=43)                                                                 | 5 Criteria:<br>1) min SpO <sub>2</sub> < 90%, 2) max PtcCO <sub>2</sub> > 50 mmHg, 3) time with SpO <sub>2</sub> < 90% ≥ 2%, 4) time with PtcCO <sub>2</sub> > 50 mmHg ≥ 2%, 5) ODI > 1.4/h, 6) AHI > 10/h.<br>Subacute: most patients had ≥ 3 criteria,<br>Chronic: most patients had ≥ 4 criteria |
| Weiss et al. [10]  | Austria  | Klin Padiatr        | Cross-sectional survey by questionnaire on 2013 | 95 children<br><br>CPAP 9/143<br>Other NIV         |               | Signs and symptoms before onset:<br>68% nocturnal hypoxemia<br>70% nocturnal hypercapnia<br>29% ARF<br>28% recurrent pneumonias<br>17% failure to thrive<br>37% other symptoms                                                       | Not specified                                                                                                                                                                                                                                                                                       |
| Nathan et al. [11] | Malaysia | Pediatr Pulmonol    | Retrospective study at 1 center 2001-2014       | 30 CPAP<br>30 BPAP<br>10 IV                        |               | Indications:<br>54% increase in work of breathing<br>31% hypoventilation<br>6% hypoxemia<br>9% heart failure<br>29/70 with additional oxygen                                                                                         | In hospital, median stay before discharge 59 (30-114) days                                                                                                                                                                                                                                          |
| Ikeda et al. [12]  | Japan    | Brain & Development | Retrospective study at 1 center 2001-2015       | 53 children treated with NIV                       | < 20 yrs      | Initiation criteria:<br>Min SpO <sub>2</sub> < 92% or max PtcCO <sub>2</sub> > 50 mmHg (not specified day or night)<br>66% in an acute setting (= failure to withdraw NIV after an ARF)<br>34 % planned initiation (without details) |                                                                                                                                                                                                                                                                                                     |

|                            |           |                  |                                          |                                              |               |                                                                                                                                                                       |                                                                                                                                                                                                                                  |
|----------------------------|-----------|------------------|------------------------------------------|----------------------------------------------|---------------|-----------------------------------------------------------------------------------------------------------------------------------------------------------------------|----------------------------------------------------------------------------------------------------------------------------------------------------------------------------------------------------------------------------------|
|                            |           |                  |                                          |                                              |               | Especially in NMD<br>94% NIV only nocturnal<br>60% with additional oxygen (40% of NMD)                                                                                |                                                                                                                                                                                                                                  |
| Amaddeo et al. [13]        | France    | Pediatr Pulmonol | Retrospective study                      | 31 children<br>All on CPAP                   | 0.8- 17.5 yrs | Outpatient program with setting criteria:<br>OSA, age > 6 m, stable condition, living in the hospital area, agreement with regular follow up<br>No pressures reported | All patients were started in an out-patient setting<br>4/31 non compliant (3 Down syndrome)<br>Median compliance 8h21min/night, 25 nights/mo<br>3 pts weaned from CPAP                                                           |
| Castro-Codesal et al. [14] | Canada    | PlosOne          | Retrospective study in Alberta 2005-2014 | 622 children<br>CPAP (75%) and BPAP (22%)    | 0-18 yrs      | initiation<br>83% started electively after on PSG<br>16% acute illness<br>1%: vital capacity < 30% or transition from IV or palliative care                           | 18% started in hospital<br>82% started at home                                                                                                                                                                                   |
| Kapur et al. [15]          | Australia | Pediatr Pulmonol | Cross-sectional study                    | 3 SMA type I, 15 SMA type II, 7 SMA type III | 0-18 yrs      | 10/25 (40%) required NIV:<br>5 for SDB,<br>5 started during lower RTI (pediatric ICU)                                                                                 | Children requiring NIV were older (10.52 vs 5.67yrs), had a lower vital capacity and higher AHI (3.65 vs 0.08),<br>2/10 pts had a PtcCO <sub>2</sub> > 50mmHg > 2% of sleep time<br>Initiation during RTI an indication? 3/5 had |

|                   |           |                  |                                           |                                                                                                     |       |                                                                                                                                                                                                                                                                                                                                                                                                                                 |                         |
|-------------------|-----------|------------------|-------------------------------------------|-----------------------------------------------------------------------------------------------------|-------|---------------------------------------------------------------------------------------------------------------------------------------------------------------------------------------------------------------------------------------------------------------------------------------------------------------------------------------------------------------------------------------------------------------------------------|-------------------------|
|                   |           |                  |                                           |                                                                                                     |       |                                                                                                                                                                                                                                                                                                                                                                                                                                 | normal subsequent PSG   |
| Leske et al. [16] | Argentina | Pediatr Pulmonol | Retrospective study at 1 center 2007-2018 | 244 children, mixed cohort<br>NIV 210/244 (86%)<br>IV 34/244 (14%)<br>CPAP 51 patients of NIV group | 0-18y | 244 patients: initiation<br>48 (20%) acute illness<br>80 (33%) subacute<br>116 (48%) elective (without details)<br>Initiation criteria:<br>79/244 (33%) on clinical status (71 without sleep study)<br>165/244 (67%) abnormal sleep study + SDB<br>Where:<br>General ward 204/244 (84%)<br>Referral hospital 18/244 (7%)<br>ICU 22/244 (9%)<br>Modes:<br>Pressure control 182/244 (74%)<br>CPAP 51/244 (21%)<br>BPAP 9/244 (4%) | All started in hospital |

Abbreviations: m: months, yrs: years, OSA: obstructive sleep apnea, BPAP: bilevel positive airway pressure, NIV: noninvasive ventilation, ICU: intensive care unit, CF: cystic fibrosis, NMD: neuromuscular disease, SMA: spinal muscular atrophy, BPD: bronchopulmonary dysplasia, ARF: acute respiratory failure, CRF: chronic respiratory failure, RTI: respiratory tract infection, SDB: sleep disordered breathing, SpO<sub>2</sub> : pulse oximetry, PtcO<sub>2</sub>: transcutaneous oxygen pressure, PtcCO<sub>2</sub>: transcutaneous carbon dioxide pressure, ABG: arterial blood gases, PHT: pulmonary hypertension, PSG: polysomnography, AHI: apnea-hypopnea index, ODI: oxygen desaturation index, CNS: central nervous system.

## References

1. Padman R, Lawless S, Von Nessen S. Use of BiPAP by nasal mask in the treatment of respiratory insufficiency in pediatric patients: preliminary investigation. *Pediatr Pulmonol* 1994; 17: 119-123.
2. Fauroux B, Boffa C, Desguerre I, *et al.* Long-term noninvasive mechanical ventilation for children at home: a national survey. *Pediatr Pulmonol* 2003; 35: 119-125.

3. Oktem S, Ersu R, Uyan ZS, *et al.* Home ventilation for children with chronic respiratory failure in Istanbul. *Respiration* 2008; 76: 76-81.
4. McDougall CM, Adderley RJ, Wensley DF, *et al.* Long-term ventilation in children: longitudinal trends and outcomes. *Arch Dis Child* 2013; 98: 660-665.
5. Amin R, Sayal P, Syed F, *et al.* Pediatric long-term home mechanical ventilation: twenty years of follow-up from one Canadian center. *Pediatr Pulmonol* 2014; 49: 816-824.
6. Rose L, McKim DA, Katz SL, *et al.* Home mechanical ventilation in Canada: a national survey. *Respir Care* 2015; 60: 695-704.
7. Chatwin M, Tan HL, Bush A, *et al.* Long term non-invasive ventilation in children: impact on survival and transition to adult care. *PLoS One* 2015; 10: e0125839.
8. Edwards JD, Houtrow AJ, Lucas AR, *et al.* Children and young adults who received tracheostomies or were initiated on long-term ventilation in PICUs. *Pediatr Crit Care Med* 2016; 17: e324-334.
9. Amaddeo A, Moreau J, Frapin A, *et al.* Long term continuous positive airway pressure (CPAP) and noninvasive ventilation (NIV) in children: Initiation criteria in real life. *Pediatr Pulmonol* 2016; 51: 968-974.
10. Weiss S, Van Egmond-Frohlich A, Hofer N, *et al.* Long-term respiratory support for children and adolescents in Austria: A national survey. *Klinische Padiatrie* 2016; 228: 42-46.
11. Nathan AM, Loo HY, de Bruyne JA, *et al.* Thirteen years of invasive and noninvasive home ventilation for children in a developing country: A retrospective study. *Pediatr Pulmonol* 2017; 52: 500-507.
12. Ikeda A, Tsuji M, Goto T, *et al.* Long-term home non-invasive positive pressure ventilation in children: Results from a single center in Japan. *Brain Dev* 2018; 40: 558-565.
13. Amaddeo A, Frapin A, Touil S, *et al.* Outpatient initiation of long-term continuous positive airway pressure in children. *Pediatr Pulmonol* 2018; 53: 1422-1428.
14. Castro-Codezal ML, Dehaan K, Bedi PK, *et al.* Longitudinal changes in clinical characteristics and outcomes for children using long-term non-invasive ventilation. *PLoS One* 2018; 13: e0192111.
15. Kapur N, Deegan S, Parakh A, *et al.* Relationship between respiratory function and need for NIV in childhood SMA. *Pediatr Pulmonol* 2019; 54: 1774-1780.
16. Leske V, Guerdile MJ, Gonzalez A, *et al.* Feasibility of a pediatric long-term home ventilation program in Argentina: 11 years' experience. *Pediatr Pulmonol* 2020; 55: 780-787.
