# Supplementary material
Source: HighWire-hosted journal article supplement (https://erj.ersjournals.com/content/59/6/2101404)
Supplement: inline-supplementary-material-6 [file inline-supplementary-material-6.pdf]

**Online Table S3.2:** Initial and follow up settings for CPAP

| Author              | Country   | Journal        | Type of study                               | Number of patients                                                                                                          | Ages           | CPAP mode                                     | CPAP level                                                                                                                                                                       | Follow up                                                                                                                         |
|---------------------|-----------|----------------|---------------------------------------------|-----------------------------------------------------------------------------------------------------------------------------|----------------|-----------------------------------------------|----------------------------------------------------------------------------------------------------------------------------------------------------------------------------------|-----------------------------------------------------------------------------------------------------------------------------------|
| Marcus et al. [1]   | USA       | J Pediatr      | Retrospective study (written questionnaire) | 94 children with obesity (27%), craniofacial malformation (25%), OSA type I (idiopathic post AT) (17%), Down syndrome (13%) | 0-19 yrs       | Constant CPAP-titration with PSG              | Available for 70 patients<br>Median CPAP =8 (range 4-20), CPAP were independent of age and diagnosis                                                                             | Every 4 to 12 months<br>Follow up: 22% required modification of CPAP level during follow up                                       |
| McNamara et al. [2] | Australia | Chest          | Prospective study                           | 24 infants on long term CPAP                                                                                                | 1-51 weeks old | Constant CPAP - Titration with PSG            | Initial setting 3.7 to 6 cmH <sub>2</sub> O<br>Increments of 0.3 until obstruction overcome on PSG<br>5 infants with upper airway anomalies required up to 10 cmH <sub>2</sub> O | CPAP discontinued in 13 infants ; CPAP level was increased in the 5 other infants<br>(6 drop off due to non-compliance/adherence) |
| Massa et al. [3]    | UK        | Arch Dis Child | Retrospective study                         | 42/66 children on long term CPAP (17 (26%) failed trials and alternative treatment)                                         | 0-19 yrs       | Data on 42 children who ended up successfully | Start at 4 cmH <sub>2</sub> O then increments of 2 cm to overcome OSA and desaturation on PSG<br>Mean CPAP 8.5 ±                                                                 | Side effect: skin irritation/nasal dryness<br>Up to 3 trials to achieve adherence                                                 |

|                   |           |                        |                                            |                                                                                           |                               |                  |                                                                                                                                                                                                                                                 |                                                                                                                            |
|-------------------|-----------|------------------------|--------------------------------------------|-------------------------------------------------------------------------------------------|-------------------------------|------------------|-------------------------------------------------------------------------------------------------------------------------------------------------------------------------------------------------------------------------------------------------|----------------------------------------------------------------------------------------------------------------------------|
|                   |           |                        |                                            |                                                                                           |                               | adhering to CPAP | 3.2 cmH <sub>2</sub> O (4-16)                                                                                                                                                                                                                   |                                                                                                                            |
| Marcus et al. [4] | USA       | Pediatrics             | Prospective randomized study: CPAP or BPAP | 29 children (13 CPAP 16 BPAP) 19 patients completed the study – of note 19 obese patients | 2-16 yrs                      | CPAP vs BPAP     | CPAP started at 3 cmH <sub>2</sub> O then 4 then increments of 2 to overcome OSA on PSG<br>BPAP aim to have 6 differential starting 4/3, 6/3, 8/3, 10/4,12/6,14/8,16/10<br>CPAP $8 \pm 3$ (4-12)<br>BPAP $11 \pm 4$ (4-16) and $5 \pm 3$ (3-10) | CPAP vs BPAP no effect on drop outs, same mean compliance at 6 m: $5.3 \pm 2.5$ h/night                                    |
| Tan et al. [5]    | Australia | J Pediatr Child Health | Retrospective study over 1 yr              | 61 sleep studies in 45 children 33% PSG, 33% polygraphy and 33% with autoCPAP             | 0.4-18.6 yrs (median 8.3 yrs) |                  | 64% CPAP - 31% BPAP<br>Changes to improve OSA or ventilation where any persistent apnoea, hypopnoea or hypoventilation                                                                                                                          | Changes recommended in 66%:<br>12 CPAP increase, 12 BPAP increase, 1 CPAP decrease, 4 BPAP decrease, 2 CPAP withdrawal     |
| Marcus et al. [6] | USA       | J Clin Sleep Med       | Prospective double blind randomized study  | 56 children                                                                               | 2-16 yrs                      | CPAP vs BiFlex   | At 3 m:<br>CPAP $10 \pm 3$<br>BiFlex $14 \pm 3$ and $8 \pm 2$                                                                                                                                                                                   | At 3 m: same efficacy on AHI and daytime sleepiness and compliance: 24 vs 22 nights/m and 201 vs 185 min/night for CPAP vs |

|                    |           |                   |                                                                                                       |                                                                                                                          |                       |                                      |                                                                                                                                                                                                                                                |                                                                                                                                                                                                                                                                          |
|--------------------|-----------|-------------------|-------------------------------------------------------------------------------------------------------|--------------------------------------------------------------------------------------------------------------------------|-----------------------|--------------------------------------|------------------------------------------------------------------------------------------------------------------------------------------------------------------------------------------------------------------------------------------------|--------------------------------------------------------------------------------------------------------------------------------------------------------------------------------------------------------------------------------------------------------------------------|
|                    |           |                   |                                                                                                       |                                                                                                                          |                       |                                      |                                                                                                                                                                                                                                                | BiFlex                                                                                                                                                                                                                                                                   |
| Khirani et al. [7] | France    | Crit Care         | Prospective physiological study: oesogastric pressures measures vs clinical parameters, single centre | 12 infants, 5 BPD and 7 UAO (3 laryngomalacia, 1 OSA, 1 Down syndrome, 1 Pierre Robin Sequence, 1 Prader Willi syndrome) | 2-22 m<br>3.6-10.3 kg | Constant CPAP, different ventilators | CPAP level set on clinical signs: 8 cmH <sub>2</sub> O<br>CPAP level set on oesogastric pressures: 10 cmH <sub>2</sub> O<br>Physiological data superior to clinical. Patients discharged home with CPAP level determined by physiological data | Follow up program not specified.<br>Improved gas exchange and weight gain.<br>All patients weaned from CPAP (6 m – 3 yo) after improved clinical status                                                                                                                  |
| Widger et al. [8]  | Australia | Sleep & Breathing | Retrospective study of all patients on respiratory support (CPAP + BPAP) 2007-2012<br>Single centre   | 42 children (25 CPAP + 17 BPAP) had 71 PSG                                                                               | 11 ± 6 yrs            | CPAP + BPAP                          | CPAP titration 1-2 cm upwards or downwards based on presence/absence of apnoeas/hypopnoeas on PSG, special protocol for adjustment of BPAP                                                                                                     | Annual titration PSGs. Changes recommended in 27/41 studies with CPAP and 11/30 studies with NIV – overall recommended in 53% of studies<br>Full or partial changes implemented in 90% improvement in OSA symptoms on questionnaire in 50% when changes were implemented |
| Chatwin et al. [9] | UK        | PlosOne           | Retrospective descriptive study of                                                                    | 449 children started on home NIV,                                                                                        | < 17 yrs<br>13%<1     | CPAP (12%) + BPAP                    | CPAP settings 8 ± 1.3 cmH <sub>2</sub> O                                                                                                                                                                                                       | PSG 3 m after initiation of respiratory support, then 3 m again and if                                                                                                                                                                                                   |

|                     |           |                  |                                                                                                                                            |                                                                |                               |                                        |                                                                                                                                                                                       |                                                                                                                                                                                                                                                                                                            |
|---------------------|-----------|------------------|--------------------------------------------------------------------------------------------------------------------------------------------|----------------------------------------------------------------|-------------------------------|----------------------------------------|---------------------------------------------------------------------------------------------------------------------------------------------------------------------------------------|------------------------------------------------------------------------------------------------------------------------------------------------------------------------------------------------------------------------------------------------------------------------------------------------------------|
|                     |           |                  | outcomes at 1 center 1993-2011                                                                                                             | 565 with NMD                                                   | y, age at initiation 8.7 ±6 y |                                        |                                                                                                                                                                                       | stable, once a year                                                                                                                                                                                                                                                                                        |
| Amaddeo et al. [10] | France    | Sleep Med        | Retrospective study using PGs of consecutive patients between 2011-2014, single centre                                                     | 29 control PGs in 26 stable children treated with CPAP at home | 7.8 ± 6.2 yrs                 | CPAP in 23 patients and Auto-CPAP in 3 | Mean CPAP 7.7 ±1.5cm H <sub>2</sub> O at time of PGs                                                                                                                                  | Median respiratory events index: 1.4/h (range 0-34), > obstructive events often associated with desaturations/arousal; 50% unintentional leaks but with no desaturations. PGs resulted in 7 CPAP changes in settings or interface: 3 increase, 1 decrease, 1 to auto-CPAP, 1 to NIV and 1 interface change |
| Mihai et al. [11]   | Australia | J Clin Sleep Med | Retrospective review on prospective collected data on children initially treated with auto-CPAP before switching to fixed CPAP (2013-2015) | 26 children treated with auto-CPAP                             | 11.9 ± 3.4 yrs                | Auto-CPAP                              | Median CPAP level on titration PSG (9 (7-10)) comparable to median 90 <sup>th</sup> percentile CPAP level on auto-CPAP (8.1 (7.1-9.5)) and higher than mean auto-CPAP (6.3 (5.3-7.5)) | 90 <sup>th</sup> percentile CPAP is useful but does not completely eliminate the need for titration PSG when determining optimal CPAP level. Mean CPAP level downloaded from Auto-CPAP machine can be used to effectively shorten the PSG titration study                                                  |

|                      |        |                  |                                                                                                                                                                                                                                                                 |                                                                                                                                                                 |                |                    |                                                                                                                                                                                                                                                                                                                 |                                                                                                                                                                                                                                                                                                                                                                                      |
|----------------------|--------|------------------|-----------------------------------------------------------------------------------------------------------------------------------------------------------------------------------------------------------------------------------------------------------------|-----------------------------------------------------------------------------------------------------------------------------------------------------------------|----------------|--------------------|-----------------------------------------------------------------------------------------------------------------------------------------------------------------------------------------------------------------------------------------------------------------------------------------------------------------|--------------------------------------------------------------------------------------------------------------------------------------------------------------------------------------------------------------------------------------------------------------------------------------------------------------------------------------------------------------------------------------|
| Al-Saleh et al. [12] | Canada | J Clin Sleep Med | Retrospective study 2009/2013<br>Single centre<br>Review of PSGs for technology titration in patients with CPAP, BPAP or IV<br>Major change: changes in mode, pressure/ rate and/or mask<br>Minor change: inspiratory time, rise time, trigger or cycle setting | 623 titration PSG in 166 children treated with BPAP and 83 children treated with CPAP and 25 children with IV<br>50% respiratory disorders, 28% NMD and 22% CNS | 10.5 ± 5.1 yrs | CPAP<br>BPAP<br>IV | CPAP titration from 4, increase 1-2, max 15 cmH <sub>2</sub> O<br>Switch to BPAP if CPAP failure<br>BPAP: Start spontaneous/timed mode, titrate from 8/4 cmH <sub>2</sub> O, back-up rate 8 bpm, increase inspiratory / expiratory pressures by 1-2 cmH <sub>2</sub> O, minimum difference 4 cmH <sub>2</sub> O | Major outcome: clinical predictors of changes at follow-up PSG: age at PSG, CNS or NMD diagnosis, BPAP and shorter time between start of therapy and PSG had higher likelihood of a change in settings.<br>62% major change, 11% minor change, 27% no change, 4% mask change, 3% mode change.<br>First titration study should be done no more than a year after treatment initiation |
|----------------------|--------|------------------|-----------------------------------------------------------------------------------------------------------------------------------------------------------------------------------------------------------------------------------------------------------------|-----------------------------------------------------------------------------------------------------------------------------------------------------------------|----------------|--------------------|-----------------------------------------------------------------------------------------------------------------------------------------------------------------------------------------------------------------------------------------------------------------------------------------------------------------|--------------------------------------------------------------------------------------------------------------------------------------------------------------------------------------------------------------------------------------------------------------------------------------------------------------------------------------------------------------------------------------|

Abbreviations: m: months, yrs: years, OSA: obstructive sleep apnea, BPAP: bilevel positive airway pressure, NIV: noninvasive ventilation, IV: invasive ventilation, NMD: neuromuscular disease, PSG: polysomnography, PG: respiratory polygraphy, AHI: apnea-hypopnea index, , CNS: central nervous system.

## References

1. Marcus CL, Ward SL, Mallory GB, *et al.* Use of nasal continuous positive airway pressure as treatment of childhood obstructive sleep apnea. *J Pediatr* 1995; 127: 88-94.

2. McNamara F, Sullivan CE. Obstructive sleep apnea in infants and its management with nasal continuous positive airway pressure. *Chest* 1999; 116: 10-16.
3. Massa F, Gonzalez S, Lavery A, *et al.* The use of nasal continuous positive airway pressure to treat obstructive sleep apnoea. *Arch Dis Child* 2002; 87: 438-443.
4. Marcus CL, Rosen G, Ward SLD, *et al.* Adherence to and effectiveness of positive airway pressure therapy in children with obstructive sleep apnea. *Pediatrics* 2006; 117: e442-e451.
5. Tan E, Nixon GM, Edwards EA. Sleep studies frequently lead to changes in respiratory support in children. *J Paediatr Child Health* 2007; 43: 560-563.
6. Marcus CL, Radcliffe J, Konstantinopoulou S, *et al.* Effects of positive airway pressure therapy on neurobehavioral outcomes in children with obstructive sleep apnea. *Am J Respir Crit Care Med* 2012; 185: 998-1003.
7. Khirani S, Ramirez A, Aloui S, *et al.* Continuous positive airway pressure titration in infants with severe upper airway obstruction or bronchopulmonary dysplasia. *Crit Care* 2013; 17: R167.
8. Widger JA, Davey MJ, Nixon GM. Sleep studies in children on long-term non-invasive respiratory support. *Sleep Breath* 2014; 18: 885-889.
9. Chatwin M, Tan HL, Bush A, *et al.* Long term non-invasive ventilation in children: impact on survival and transition to adult care. *PLoS One* 2015; 10: e0125839.
10. Amaddeo A, Caldarelli V, Fernandez-Bolanos M, *et al.* Polygraphic respiratory events during sleep in children treated with home continuous positive airway pressure: description and clinical consequences. *Sleep Med* 2015; 16: 107-112.
11. Mihai R, Vandeleur M, Pecoraro S, *et al.* Autotitrating CPAP as a tool for CPAP initiation for children. *J Clin Sleep Med* 2017; 13: 713-719.
12. Al-Saleh S, Sayal P, Stephens D, *et al.* Factors associated with changes in invasive and noninvasive positive airway pressure therapy settings during pediatric polysomnograms. *J Clin Sleep Med* 2017; 13: 183-188.
