# Supplementary material
Source: HighWire-hosted journal article supplement (https://erj.ersjournals.com/content/59/6/2101404)
Supplement: inline-supplementary-material-7 [file inline-supplementary-material-7.pdf]

**Online Table S3.3:** Initial and follow up settings for NIV

| Author              | Country | Journal            | Type of study                                                     | Number of patients                                                                         | Ages       | NIV mode                                             | NIV settings                                                                                                                                                                                   |
|---------------------|---------|--------------------|-------------------------------------------------------------------|--------------------------------------------------------------------------------------------|------------|------------------------------------------------------|------------------------------------------------------------------------------------------------------------------------------------------------------------------------------------------------|
| Khan et al. [1]     | UK      | Arch Dis Child     | Retrospective study                                               | 8 children with NMD: 4 congenital myopathy, 2 congenital muscular dystrophy, 2 rigid spine | 6-13 yrs   | All treated with NIV                                 | IPAP 10-14 cmH <sub>2</sub> O<br>BUR 12-18/min                                                                                                                                                 |
| Nabatame et al. [2] | Japan   | Brain Dev          | Retrospective study                                               | 4 children juvenile Pompe disease                                                          | 9-15 yrs   | 3 treated with NIV                                   | IPAP 10-12 cmH <sub>2</sub> O<br>EPAP 3-4 cmH <sub>2</sub> O                                                                                                                                   |
| Mellies et al. [3]  | Germany | Neuromuscul Disord | Prospective study                                                 | 6 infants with SMA I and 1 with SMA II (+ 6 SMA controls without NIV)                      | 6 – 11 yrs | 7 treated with NIV                                   | IPAP 10.5 cmH <sub>2</sub> O<br>EPAP 3.7 cmH <sub>2</sub> O<br>BUR 16/min                                                                                                                      |
| Fauroux et al. [4]  | France  | Crit Care Med      | Prospective physiological study<br>oesogastric pressure measures  | 8 children with CF                                                                         | 11-17 yrs  | Comparison volume/targeted vs pressure-targeted mode | Similar efficacy of the 2 modes but greater decrease of the work of breathing when the patients adopted a controlled mode (+ greater subjective comfort by VAS)                                |
| Fauroux et al. [5]  | France  | Eur Respir J       | Prospective physiological study:<br>oesogastric pressure measures | 10 children with CF                                                                        | 10-21 yrs  | Pressure support                                     | Better setting with oesogastric pressure measures:<br>IPAP 12-20 cmH <sub>2</sub> O (mean 16), high peak insp flow, sensitive inspiratory trigger, expiratory trigger 25-50%), less asynchrony |

Abbreviations: yrs: years, NIV: noninvasive ventilation, ICU: intensive care unit, IPAP: inspiratory pressure, EPAP: expiratory pressure, BUR: back up rate, CF: cystic fibrosis, NMD: neuromuscular disease.

## References

1. Khan Y, Heckmatt JZ, Dubowitz V. Sleep studies and supportive ventilatory treatment in patients with congenital muscle disorders. *Arch Dis Child* 1996; 74: 195-200.
2. Nabatame S, Taniike M, Sakai N, *et al.* Sleep disordered breathing in childhood-onset acid maltase deficiency. *Brain Dev* 2009; 31: 234-239.
3. Mellies U, Dohna-Schwake C, Stehling F, *et al.* Sleep disordered breathing in spinal muscular atrophy. *Neuromuscul Disord* 2004; 14: 797-803.
4. Fauroux B, Pigeot J, Polkey MI, *et al.* In vivo physiologic comparison of two ventilators used for domiciliary ventilation in children with cystic fibrosis. *Crit Care Med* 2001; 29: 2097-2105.
5. Fauroux B, Nicot F, Essouri S, *et al.* Setting of noninvasive pressure support in young patients with cystic fibrosis. *Eur Respir J* 2004; 24: 624-630.
