# Supplementary material
Source: HighWire-hosted journal article supplement (https://erj.ersjournals.com/content/59/6/2101404)
Supplement: inline-supplementary-material-9 [file inline-supplementary-material-9.pdf]

**Online Table S4.2:** Side effects of interfaces

| Author              | Country | Journal            | Number of patients                                                                                                                 | Ages          | Type of study                                                  | Results                                                                                                                                                                                                                                                                                                                                                                                                                                                                                                                                                                                             |
|---------------------|---------|--------------------|------------------------------------------------------------------------------------------------------------------------------------|---------------|----------------------------------------------------------------|-----------------------------------------------------------------------------------------------------------------------------------------------------------------------------------------------------------------------------------------------------------------------------------------------------------------------------------------------------------------------------------------------------------------------------------------------------------------------------------------------------------------------------------------------------------------------------------------------------|
| Ramirez et al. [1]  | France  | Intensive Care Med | 97 children started on CPAP/NIV:35 NMD or scoliosis, 32 craniofacial malformation, OSA without facial malformation, 9 lung disease | 0 - 18 yrs    | Descriptive study                                              | All 25 children $\leq 2$ yrs + 4 older children needed custom made nasal masks.<br>In other patients, an industrial nasal mask, a facial mask, or nasal prongs were used in 50%, 16%, and 2% of pts.<br>Industrial masks without and with manufacturer leaks were used in 35 (36%) and 33 (34%) pts, respectively. The interface had to be changed in 20 (21%) patients because of discomfort (n=16), leaks (n=4), facial growth (n=3), skin injury (n=2), or change of ventilatory mode (n=2). A second or third mask change was necessary in 9 and 4 patients, respectively (> maxillofacial pts) |
| Kushida et al. [2]  | USA     | J Clin Sleep Med   | 16                                                                                                                                 | 2.4 - 7.7 yrs | Comparison of the Pixi mask with other masks                   | Pixi mask rated as more comfortable by parents (less restless sleep, trouble getting asleep and staying asleep), fewer skin side effects (marks on upper lip and under the ear) and easier to remove than previous mask<br>Compliance with Pixi $7.1 \pm 2.5$ h/night vs $8.2 \pm 2.1$ h/night with previous mask (not significant)), PSG results comparable                                                                                                                                                                                                                                        |
| Acorda et al. [3]   | USA     | J Ped Nursing      | ?                                                                                                                                  | ?             | Descriptive study<br>In hospital BPAP (in fact CPAP) treatment | Decrease of number and severity of skin pressure related ulcers after protocolized management (no numbers)                                                                                                                                                                                                                                                                                                                                                                                                                                                                                          |
| Visscher et al. [4] | USA     | Respir Care        | 50                                                                                                                                 | 0.1-32.5 yrs  | Prospective study: 3-dimensional face                          | Stage I ulcers most common, nose bridge most common, high skin hydration was associated with skin ulcers, areas of high contact were associate with                                                                                                                                                                                                                                                                                                                                                                                                                                                 |

|                           |           |                       |                                                                                                   |                                                          |                                                                    |                                                                                                                                                                                                                                                                                                                                                                                                                                        |
|---------------------------|-----------|-----------------------|---------------------------------------------------------------------------------------------------|----------------------------------------------------------|--------------------------------------------------------------------|----------------------------------------------------------------------------------------------------------------------------------------------------------------------------------------------------------------------------------------------------------------------------------------------------------------------------------------------------------------------------------------------------------------------------------------|
|                           |           |                       |                                                                                                   |                                                          | imaging and measure of skin hydration                              | skin erythema and pressure ulcers.<br>A cloth mask was associated with the best skin tolerance.                                                                                                                                                                                                                                                                                                                                        |
| Fauroux et al. [5]        | France    | Intensive Care Med    | 40                                                                                                | 0.2-17 yrs                                               | Descriptive study                                                  | 47% skin injury, predictors: age > 10 yrs + commercial mask<br>37% maxillary retrusion, predictor: longer daily use                                                                                                                                                                                                                                                                                                                    |
| Roberts et al. [6]        | USA       | J Clin Sleep Med      | 50 CPAP compliant compared to 50 non-compliant                                                    | Children with craniofacial conditions, mean age 10.4 yrs | Retrospective study, serial cephalographic images                  | Greater mean retrusion of mid-face in compliant pts + counterclockwise rotation of the palatal plane + upper incisor flaring                                                                                                                                                                                                                                                                                                           |
| Tibbals et al. [7]        | Australia | Pediatr Pulmonol      | 4 children with CCHS                                                                              | 6-16 yrs                                                 | Descriptive study                                                  | All treated with NIV, 3 transitioned to negative pressure ventilation due to mid-face hypoplasia                                                                                                                                                                                                                                                                                                                                       |
| Castro-Codesal et al. [8] | Canada    | Paediatr Respir Rev   |                                                                                                   |                                                          | Review of the mask interfaces for home NIV in infants and children | Interface-related problems are common and, if not recognized, have the potential to cause serious damage, jeopardize the use of the therapy, or lead to poor adherence. Frequent mask-related complications include nasal symptoms, unintentional leak, mask displacement, skin injury, and midface hypoplasia. Close monitoring and a pro-active approach may help to minimize complications and promote the optimal use of home NIV. |
| De Jesus Rojas et al. [9] | USA       | The Open Respir Med J | 18 children<br>7 chest wall disease, 6 central control abnormalities, 3 obstructive lung disease, | 4 m -19 yrs (average 7 yrs)                              | Retrospective case series                                          | Complications associated with Nasal NIV/RAM Cannula were negligible in our study population. A minimal nasal rub on the nasal columella was reported as an adverse side effect in one patient.                                                                                                                                                                                                                                         |

|                 |         |                     |                                 |            |                                                                                                                                    |                                                                                                                                                                                                                                                                                                                                                                                            |
|-----------------|---------|---------------------|---------------------------------|------------|------------------------------------------------------------------------------------------------------------------------------------|--------------------------------------------------------------------------------------------------------------------------------------------------------------------------------------------------------------------------------------------------------------------------------------------------------------------------------------------------------------------------------------------|
|                 |         |                     | and 2 restrictive lung disease. |            |                                                                                                                                    |                                                                                                                                                                                                                                                                                                                                                                                            |
| Norregaard [10] | Denmark | Eur Respir J        |                                 |            | Review                                                                                                                             | Adverse effects are generally minor, although in the chronic setting the effect of the interface on facial bony structures should be monitored closely.                                                                                                                                                                                                                                    |
| Wallis [11]     | UK      | Paediatr Respir Rev | 76 children (survey)            | 0.3-16 yrs | Review + results of a survey (home CPAP via nasal mask for obstructive sleep apnoea: The Great Ormond Street Experience 1994–1998) | The mask should not be fitted tightly onto the face, but secured by straps that maintain a gentle pressure equally around the mask. Mask ventilation is safe and major complications have not been reported frequently. Masks need individual adjustment and the level of pressure support requires regular evaluation to ensure adequate gas exchange. Minor problems occasionally arise. |

Abbreviations: m: months, yrs: years, OSA: obstructive sleep apnea, CPAP: continuous positive airway pressure, BPAP: bilevel positive airway pressure, NIV: noninvasive ventilation, NMD: neuromuscular disease, CCHS : congenital central hypoventilation.

## References

1. Ramirez A, Delord V, Khirani S, *et al.* Interfaces for long-term noninvasive positive pressure ventilation in children. *Intensive Care Med* 2012; 38: 655-662.
2. Kushida CA, Halbower AC, Kryger MH, *et al.* Evaluation of a new pediatric positive airway pressure mask. *J Clin Sleep Med* 2014; 10: 979-984.
3. Acorda DE. Nursing and respiratory collaboration prevents BiPAP-related pressure ulcers. *J Pediatr Nurs* 2015; 30: 620-623.
4. Visscher MO, White CC, Jones JM, *et al.* Face Masks for Noninvasive Ventilation: Fit, Excess Skin Hydration, and Pressure Ulcers. *Respir Care* 2015; 60: 1536-1547.
5. Fauroux B, Lavis JF, Nicot F, *et al.* Facial side effects during noninvasive positive pressure ventilation in children. *Intensive Care Med* 2005; 31: 965-969.

6. Roberts SD, Kapadia H, Greenlee G, *et al.* Midfacial and dental changes associated with nasal positive airway pressure in children with obstructive sleep apnea and craniofacial conditions. *J Clin Sleep Med* 2016; 12: 469-475.
7. Tibballs J, Henning RD. Noninvasive ventilatory strategies in the management of a newborn infant and three children with congenital central hypoventilation syndrome. *Pediatr Pulmonol* 2003; 36: 544-548.
8. Castro-Codezal ML, Olmstead DL, MacLean JE. Mask interfaces for home non-invasive ventilation in infants and children. *Paediatr Respir Rev* 2019; 32: 66-72.
9. De Jesus Rojas W, Samuels CL, Gonzales TR, *et al.* Use of nasal non-invasive ventilation with a RAM cannula in the outpatient home setting. *Open Respir Med J* 2017; 11: 41-46.
10. Nørregaard O. Noninvasive ventilation in children. *Eur Respir J* 2002; 20: 5.
11. Wallis C. Non-invasive home ventilation. *Paediatr Respir Rev* 2000; 1: 165-171.
