# Supplementary material
Source: HighWire-hosted journal article supplement (https://erj.ersjournals.com/content/59/6/2101404)
Supplement: inline-supplementary-material-11 [file inline-supplementary-material-11.pdf]

**Online Table S5.1:** Follow up of CPAP and NIV

| Author              | Country   | Journal                | Type of study       | Number of patients                                                                                      | Ages           | Follow up and outcome                                                                                                                                                                                                                                                                                                                                                                                     |
|---------------------|-----------|------------------------|---------------------|---------------------------------------------------------------------------------------------------------|----------------|-----------------------------------------------------------------------------------------------------------------------------------------------------------------------------------------------------------------------------------------------------------------------------------------------------------------------------------------------------------------------------------------------------------|
| Tan et al. [1]      | Australia | J Pediatr Child Health | Retrospective study | 61 sleep studies in 45 children: 29 CPAP, 14 BPAP, 2 tracheotomy                                        | 0.4 - 18.6 yrs | Children on CPAP/NIV > 3 m, stable condition, 1/3 PSG, 2/3 PG<br>51% of children had a sleep study in the previous 6 m<br>40 (61%) studies resulted in a change of setting: 12 increase in CPAP, 12 increase in BPAP, 1 decrease in CPAP, 4 decrease in BPAP, 2 discontinuation of CPAP, 8 need to continue CPAP (no weaning)<br>Necessity of systematic PSG/PG in children treated with CPAP/NIV         |
| Paiva et al. [2]    | France    | Intensive Care Med     | Retrospective study | 50 children treated with NIV (40) or CPAP (10): 23 NMD, 2 lung, 23 upper airway disease                 | 8.5 ± 5.2 yrs  | Routine follow up, none of the patients had SDB symptoms<br>Overnight SpO <sub>2</sub> + PtcCO <sub>2</sub> with CPAP/NIV: 21 (42%) had a nocturnal PtcCO <sub>2</sub> ≥ 50 mmHg ≥ 10% recording time or ≥ 5 continuous min, 18/21 had normal daytime PCO <sub>2</sub> , and all had a nocturnal SpO <sub>2</sub> > 90%<br>Necessity of systematic overnight PtcCO <sub>2</sub> recording during CPAP/NIV |
| Felemban et al. [3] | France    | Pediatric Pulmonology  | Prospective study   | 24 children treated with NIV: 11 NMD, 3 lung disease, 9 upper airway anomaly, 1 central hypoventilation | 4 -19 yrs      | 29 pairs of home/hospital overnight SpO <sub>2</sub> + PtcCO <sub>2</sub> recordings/24 pts<br>Feasibility: 1 SpO <sub>2</sub> failure in hospital<br>Results similar between home vs hospital at lower cost<br>Value of a home overnight SpO <sub>2</sub> + PtcCO <sub>2</sub> recording during NIV with trained technicians (home care provider)                                                        |
| Griffon et al. [4]  | France    | Respiratory Care       | Retrospective study | 79 children treated with NIV/CPAP/HFNC                                                                  | 1.5-14 yrs     | Routine follow up, none of the patients had SDB symptoms<br>Overnight SpO <sub>2</sub> + PtcCO <sub>2</sub> with NIV (n=52, 47%), CPAP (n=43, 39%), HFNC (n=2, 2%) or spontaneous breathing (n=13, 12%)<br>Quality of recording excellent in 81%, more PtcCO <sub>2</sub> failures > SpO <sub>2</sub> failures                                                                                            |

|                       |        |                    |                           |                                                                  |              |                                                                                                                                                                                                                                                                                                                                                                                                                                                                                                                                                                                                                                                |
|-----------------------|--------|--------------------|---------------------------|------------------------------------------------------------------|--------------|------------------------------------------------------------------------------------------------------------------------------------------------------------------------------------------------------------------------------------------------------------------------------------------------------------------------------------------------------------------------------------------------------------------------------------------------------------------------------------------------------------------------------------------------------------------------------------------------------------------------------------------------|
|                       |        |                    |                           |                                                                  |              | 11 abnormal recordings in 11 patients: 6 hypercapnia, 3 hypocapnia, 2 hypoxemia, corrected by change in settings/equipment<br>Value of a home overnight SpO <sub>2</sub> + PtcCO <sub>2</sub> recording during NIV follow up with trained technicians (home care provider)                                                                                                                                                                                                                                                                                                                                                                     |
| Caldarelli et al. [5] | France | Intensive Care Med | Prospective study         | 39 children treated with NIV: 13 NMD, 15 OSA and 11 lung disease | 1 – 18 yrs   | Systematic PG during NIV in stable NIV patients<br>Unintentional leaks, patient ventilator asynchronies, decrease in ventilatory drive, upper airway obstruction with or without reduction of ventilatory drive, and mixed events were observed in 27%, 33%, 10%, 11%, 12%, and 3% of the patients, respectively. A predominant respiratory event was observed in all patients. Mean duration spent with respiratory events was 32±30% (range 3 to 96%) of total recording time.<br>Unintentional leaks were the most frequently associated with AA whereas patient ventilator asynchronies were rarely associated with AA or 3% desaturation. |
| Widger et al. [6]     |        | Sleep & Breathing  | Retrospective study       | 25 children on CPAP, 17 on BPAP                                  | 11 ± 6 yrs   | 2 pairs of titration studies: 41 CPAP + 30 BPAP<br>Changes in settings recommended in 27/41 (65%) of CPAP studies and 11/30 (36%) BPAP studies<br>Changes were implemented by physicians in 55% of cases<br>Titration studies led frequently to changes in settings                                                                                                                                                                                                                                                                                                                                                                            |
| Amaddeo et al. [7]    | France | Sleep Med          | Prospective study         | 26 children treated with CPAP                                    | 7.8±6.2 yrs  | Systematic PG during CPAP (use 10.6±14.4 m) in stable patients. Median index of total respiratory events 1.4/h (range 0-34). Mean number of different types of respiratory events per PG was 2±1 (range 0-4), with always a predominant event. Partial or total upper airway obstruction without decrease in ventilatory drive was the most frequent event and was the most frequently associated with an oxygen desaturation (in 30% of the events) and an AA (in 55% of the events).                                                                                                                                                         |
| Khirani et al. [8]    | France | Sleep Med          | Comparison of AHI scoring | 15 children treated with CPAP                                    | 1.5-18.6 yrs | Comparison of scoring of AHI on -built-in software of a CPAP device (Resmed) + integrated SpO <sub>2</sub> : automatic analysis and manual scoring on a breath-by breath analysis                                                                                                                                                                                                                                                                                                                                                                                                                                                              |

|                    |           |                                |                                          |                                            |                            |                                                                                                                                                                                                                                                                                                                                                                                                                                                                                                 |
|--------------------|-----------|--------------------------------|------------------------------------------|--------------------------------------------|----------------------------|-------------------------------------------------------------------------------------------------------------------------------------------------------------------------------------------------------------------------------------------------------------------------------------------------------------------------------------------------------------------------------------------------------------------------------------------------------------------------------------------------|
|                    |           |                                | on the built-in software and a PG        |                                            |                            | -PG during CPAP in hospital<br>Strong correlation between the AHI scored on a manual analysis of built-in software and a PG: useful for cheap and simple follow up                                                                                                                                                                                                                                                                                                                              |
| Al Iede et al. [9] | Australia | Sleep Med                      | Retrospective study                      | 148 children started on CPAP               | 1 week-16.8 yrs            | 65 primary airway disease, 33 chronic lung disease (18 BPD), 20 CHD, 12 CHD + airway anomaly, 5 congenital diaphragmatic hernia, 4 interstitial lung disease<br>Mean CPAP 7.3 cmH <sub>2</sub> O<br>Follow up: telephone call, cardiorespiratory monitoring (?) at 2 weeks, CPAP titration PSG after 3-6 m<br>30% stopped CPAP during a 15 m follow up (various reasons)                                                                                                                        |
| Liu et al. [10]    | China     | Sleep & Breathing              | 3 case reports                           | 3 children                                 | 2 m - 5 yrs                | 1 OSA + PHT (CPAP), 1 Pierre Robin Sequence (BPAP), 1 laryngomalacia<br>Home monitoring with TELETREK: home base remote monitoring system via telephone that records SpO <sub>2</sub> , heart rate, CPAP use, leaks                                                                                                                                                                                                                                                                             |
| Zhou et al. [11]   | China     | Int J Pediatr Otorhinolaryngol | Retrospective study 2009 - 2011          | 17 patients:                               | 1 m - 12 yrs               | TM: no details on what data is transmitted: ventilator data (pressure, leaks). Remote monitoring system activated by parents.<br>Parents uploaded the data on 93.3% of days.<br>No system or device failure<br>Less time to upload the data ( $5.7 \pm 3.1$ min) compared to the travel time to hospital ( $371 \pm 182$ min)<br>Cost was 59% lower than a hospital visit<br>System convenient and easy to use for > 80% of parents                                                             |
| Trucco et al. [12] | Italy     | J Telemed Telecare             | 2-year longitudinal multicentre TM trial | 48 children with NMD + controls without TM | median 16.4 yrs (8.9-22.1) | TM trial protocol: patients' weekly overnight home-recording of SpO <sub>2</sub> , heart rate and ventilation with transmission to each TM centre the following morning. Overnight data were reviewed by non-physicians and calls to families made to assess clinical condition. If necessary, unscheduled transmissions or calls were activated and managed by non-physicians or medical team according to severity<br>Exacerbations in TM patients did not differ (59 versus 53; $p = 0.15$ ) |

|                      |        |                        |                                                              |                                                                                                             |               |                                                                                                                                                                                                                                                                                                                                                                                                                                                                                                                                                                                                                             |
|----------------------|--------|------------------------|--------------------------------------------------------------|-------------------------------------------------------------------------------------------------------------|---------------|-----------------------------------------------------------------------------------------------------------------------------------------------------------------------------------------------------------------------------------------------------------------------------------------------------------------------------------------------------------------------------------------------------------------------------------------------------------------------------------------------------------------------------------------------------------------------------------------------------------------------------|
|                      |        |                        |                                                              |                                                                                                             |               | <p>from controls.</p> <p>Hospitalisations were reduced in TM patients when compared with those prior to TM (11 versus 24, <math>p = 0.04</math>) and to controls (11 versus 21, <math>p = 0.03</math>). Median hospitalisation length was lower in TM patients than controls (6 versus 7 days, <math>p = 0.03</math>). Caregivers satisfaction was excellent with no changes in Caregiver Burden Inventory</p>                                                                                                                                                                                                              |
| Casavant et al. [13] | USA    | J Telemed and Telecare | 9-m prospective study                                        | 14 patients (children and adults) with BIPAP or ventilated through tracheostomy: NMD, lung diseases + other | 16 m - 35 yrs | <p>Families completed questionnaires about clinical management before the addition of TM and 2–3 months after they had used TM</p> <p>Families reported higher confidence in clinical care with TM compared to telephone. The TM encounters supported clinical decision-making, especially in patients with active clinical problems or when the patient was acutely ill. The TM encounters prevented the need for 23 clinic visits, 3 emergency room visits, and probably 1 hospital admission.</p>                                                                                                                        |
| Perrem et al. [14]   | Canada | Pediatric Pulmonology  | Review of the NIV device data reports to guide clinical care |                                                                                                             |               | <p>This review provides a structured approach to the interpretation of CPAP/NIV device data reports to augment the clinical management of pediatric sleep-disordered breathing. It provided an overview of the data available from devices and their interpretation such as: check the settings, adherence and usage patterns, leak, treatment efficacy; for BPAP only: check that the back-up-rate is optimized; whether the inspiratory time settings are optimized for comfort and efficacy; BPAP is synchronous with patient respiratory effort; adherence and AHI in presence of optional pressure relief setting.</p> |

Abbreviations: m: months, NIV: noninvasive ventilation, CPAP: continuous positive airway pressure, BPAP: bilevel positive airway pressure, HFNC: high flow nasal cannula, NMD: neuromuscular disease, OSA: obstructive sleep apnea, CHD: congenital heart disease, BPD: bronchopulmonary dysplasia, PSG: polysomnography, PG: respiratory polygraphy, AHI: apnea-hypopnea index, AA: autonomic arousal, SDB: sleep disordered breathing, SpO<sub>2</sub>: pulse oximetry, PtcCO<sub>2</sub>: transcutaneous carbon dioxide pressure, TM: telemonitoring.

## References

1. Tan E, Nixon GM, Edwards EA. Sleep studies frequently lead to changes in respiratory support in children. *J Paediatr Child Health* 2007; 43: 560-563.
2. Paiva R, Krivec U, Aubertin G, *et al.* Carbon dioxide monitoring during long-term noninvasive respiratory support in children. *Intensive Care Med* 2009; 35: 1068-1074.
3. Felemban O, Leroux K, Aubertin G, *et al.* Value of gas exchange recording at home in children receiving non-invasive ventilation. *Pediatr Pulmonol* 2011; 46: 802-808.
4. Griffon L, Touil S, Frapin A, *et al.* Home overnight gas exchange for long term noninvasive ventilation in children. *Respir Care* 2020; in press:
5. Caldarelli V, Borel JC, Khirani S, *et al.* Polygraphic respiratory events during sleep with noninvasive ventilation in children: description, prevalence, and clinical consequences. *Intensive Care Med* 2013; 39: 739-746.
6. Widger JA, Davey MJ, Nixon GM. Sleep studies in children on long-term non-invasive respiratory support. *Sleep Breath* 2014; 18: 885-889.
7. Amaddeo A, Caldarelli V, Fernandez-Bolanos M, *et al.* Polygraphic respiratory events during sleep in children treated with home continuous positive airway pressure: description and clinical consequences. *Sleep Med* 2015; 16: 107-112.
8. Khirani S, Delord V, Olmo Arroyo J, *et al.* Can the analysis of built-in software of CPAP devices replace polygraphy in children? *Sleep Med* 2017; 37: 46-53.
9. Al-Iede M, Kumaran R, Waters K. Home continuous positive airway pressure for cardiopulmonary indications in infants and children. *Sleep Med* 2018; 48: 86-92.
10. Liu D, Zhou J, Liang X, *et al.* Remote monitoring of home-based noninvasive ventilation in children with obstructive sleep apnea-hypopnea syndrome. *Sleep Breath* 2012; 16: 317-328.
11. Zhou J, Liu DB, Zhong JW, *et al.* Feasibility of a remote monitoring system for home-based non-invasive positive pressure ventilation of children and infants. *Int J Pediatr Otorhinolaryngol* 2012; 76: 1737-1740.
12. Trucco F, Pedemonte M, Racca F, *et al.* Tele-monitoring in paediatric and young home-ventilated neuromuscular patients: A multicentre case-control trial. *J Telemed Telecare* 2019; 25: 414-424.
13. Casavant DW, McManus ML, Parsons SK, *et al.* Trial of telemedicine for patients on home ventilator support: feasibility, confidence in clinical management and use in medical decision-making. *J Telemed Telecare* 2014; 20: 441-419.
14. Perrem L, Mehta K, Syed F, *et al.* How to use noninvasive positive airway pressure device data reports to guide clinical care. *Pediatr Pulmonol* 2020; 55: 58-67.
