# Supplementary material
Source: HighWire-hosted journal article supplement (https://erj.ersjournals.com/content/59/6/2101404)
Supplement: inline-supplementary-material-12 [file inline-supplementary-material-12.pdf]

**Online Table S5.2:** CPAP/NIV adherence

| Author                | Country   | Journal        | Type of study                                          | Number of patients                                                           | Ages           | CPAP / NIV adherence results                                                                                                                         | Determinants of adherence                                                                   |
|-----------------------|-----------|----------------|--------------------------------------------------------|------------------------------------------------------------------------------|----------------|------------------------------------------------------------------------------------------------------------------------------------------------------|---------------------------------------------------------------------------------------------|
| Waters et al. [1]     | Australia | AJRCC M        | Retrospective study                                    | children with CPAP                                                           | < 15 yrs       | 63 (86%) continued to use CPAP after 6 m                                                                                                             | Not specified                                                                               |
| Marcus et al. [2]     | USA       | J Pediatr      | Retrospective survey by questionnaires sent to centers | 94 children                                                                  | 1 – 19 yrs     | Good adherence defined by a use > 50% of prescribed hours<br>CPAP unsuccessful in 1 patient<br>12/ 94 not adherent, in 50% attributed to the parents |                                                                                             |
| Massa et al. [3]      | UK        | Arch Dis Child | Retrospective study                                    | 49 children on long term CPAP                                                | 0- 19 yrs      | Data on 42/49 children:<br>Good adherence (use every night during whole night by parents) in 68%                                                     | Not specified                                                                               |
| Koontz et al. [4]     | USA       | Sleep          | Retrospective study in CPAP non adherent children      | 12 Behavior therapy (BT)<br>6 Behavior consultation (BC)<br>3 None (refusal) | 1-15 yrs       | Significant improvement in adherence in the BT (8.55h/night) and BS (8.58h/night) groups vs the None group (0.67h/night)                             | Behavior therapy improves adherence                                                         |
| Marcus et al. [5]     | USA       | Pediatrics     | Prospective study, CPAP vs BPAP                        | 29 children                                                                  | 2-16 yrs       | 1/3 dropped out < 6 m<br>Mean adherence at 6 m $5.3 \pm 2.5$ h/night                                                                                 | No difference between CPAP and BPAP                                                         |
| O'Donnelle et al. [6] | Canada    | Sleep          | Retrospective study                                    | Data on 50/71 children treated with CPAP                                     | $10 \pm 5$ yrs | Mean use 4.7h/night<br>Mean use on night with CPAP 6.3h/night                                                                                        |                                                                                             |
| Uong et al. [7]       | USA       | Pediatrics     | Retrospective study                                    | 46 children, data available for 27 (59%)                                     | 7-19 yrs       | Mean adherence 7 h/night, 73% of week<br>85% used CPAP > 4h/night                                                                                    | Greater improvement in AHI associated with a better adherence<br>No difference CPAP vs BPAP |

|                    |           |                  |                     |                                                                          |                     |                                                                                                                  |                                                                                                                                                                                           |
|--------------------|-----------|------------------|---------------------|--------------------------------------------------------------------------|---------------------|------------------------------------------------------------------------------------------------------------------|-------------------------------------------------------------------------------------------------------------------------------------------------------------------------------------------|
| Nixon et al. [8]   | USA       | J Pediatr        | Retrospective study | 32 children                                                              | 9.1 ± 5.3 yrs       | Mean CPAP use 4.7 ± 2.7h/night<br>Consistent users defined by CPAP use > 1h on > 6 nights/week: 10 (33%)         | The number of hours of CPAP use during the 2 <sup>nd</sup> night (and 1 <sup>st</sup> week) was predictive of the use at 2 and 3 m                                                        |
| Beebe et al. [9]   | USA       | Plos One         | Prospective study   | 13 obese adolescents                                                     | 14.8 ± 1.8 yrs      | Adherence defined by a night use > 21% of sleep time<br>6 were adherent, 7 not                                   | Improved attention and academic function in the adherent vs the non-adherent patients                                                                                                     |
| Marcus et al. [10] | USA       | J Clin Sleep Med | Prospective study   | 56 children randomized to CPAP or BPAP                                   | 12 ± 4 yrs          | No difference in adherence between CPAP and BPAP: 24 ± 6 vs 22 ± 9 nights/m and 201 ± 135 vs 185 ± 165 min/night | No difference in adherence between CPAP and BPAP                                                                                                                                          |
| Marcus et al. [11] | USA       | AJRCC M          | Prospective study   | 52 children with OSA                                                     | 12 ± 4 yrs          | Mean use 170 ± 145 min/night at M3                                                                               |                                                                                                                                                                                           |
| Simon et al. [12]  | USA       | Sleep Med        | Prospective study   | 51 children treated with CPAP (46%), BPAP (6%), auto-CPAP (48%)          | 8-17 yrs            | Mean adherence 3.4 ± 2.8 h/night, 41% of nights with a use > 4h                                                  | The usefulness of the ABCQ (Adherence Barriers to CPAP Questionnaire) questionnaire is demonstrated: useful clinic-based tool for identifying patient-specific issues with CPAP-adherence |
| DiFeo et al. [13]  | USA       | J Clin Sleep Med | Prospective study   | 56 children and parents completed a questionnaire before CPAP initiation | ?                   | Mean use 3 ± 3h/night                                                                                            | Greatest predictor of adherence: maternal education<br>Adherence lower in Afro-Americans<br>Inverse correlation with age<br>Correlation with family social support                        |
| Nathan et al. [14] | Singapore | Singapore Med J  | Retrospective study | 51 children on home CPAP/BPAP                                            | Median age 11.5 yrs | Adherence defined by a reported use ≥ 4 nights/week<br>21/51 (41%) were compliant                                | Predictors of adherence (by logistic regression): female gender, presence of asthma                                                                                                       |
| Prashad et         | USA       | J Clin           | Semi-               | 21 adolescents                                                           | 12-18 yrs           | 7 good adherence (381 ±                                                                                          | Predictors of adherence: degree                                                                                                                                                           |

|                       |        |                  |                                                                                         |                                                              |           |                                                                                                                                                                                                                                  |                                                                                                                                                                                                                                                                                                                                                                                                    |
|-----------------------|--------|------------------|-----------------------------------------------------------------------------------------|--------------------------------------------------------------|-----------|----------------------------------------------------------------------------------------------------------------------------------------------------------------------------------------------------------------------------------|----------------------------------------------------------------------------------------------------------------------------------------------------------------------------------------------------------------------------------------------------------------------------------------------------------------------------------------------------------------------------------------------------|
| al. [15]              |        | Sleep Med        | structured interviews ado and caregivers                                                | and 20 caregivers (17 mothers)                               |           | 80min/night), 7 low use ( $30 \pm 24$ min/night) and 7 no use                                                                                                                                                                    | of structure at home, social reactions, mode of communication among family members, perception of CPAP benefits                                                                                                                                                                                                                                                                                    |
| Jambhekar et al. [16] | USA    | Respir Care      | Prospective study: adherence at baseline and after a respiratory therapist intervention | 46 children                                                  | 11-18 yrs | 12 (26%) baseline adherence 0%, 12 (26%) baseline adherence 0-50% of nights, 22 (48%) baseline adherence > 50% of nights (> 4 hours/night) Significant improvement (+22-24%) in adherence in children using CPAP < 50% of nights | An (1) extensive therapeutic education session performed by a skilled respiratory therapist in pediatric CPAP improves the objective adherence in children using CPAP < 50% of nights.                                                                                                                                                                                                             |
| Ramirez et al. [17]   | France | Sleep Med        | Retrospective study                                                                     | 62 children treated with CPAP or NIV                         | 2-18 yrs  | Mean adherence 8h17 $\pm$ 2h30/night, 72% used CPAP/NIV > 8h/night, Mean number of nights with use $26 \pm 5$ nights/m                                                                                                           | No effect of mode (CPAP vs NIV), age, interface, duration of CPAP/NIV                                                                                                                                                                                                                                                                                                                              |
| Ennis et al. [18]     | Canada | J Clin Sleep Med | Semi-structured interviews in children and caregivers                                   | 7 dyads of youth-caregiver (4 NMD, 3 obesity) + 2 caregivers | > 12 yrs  | Children treated with BPAP: mean use $6.04 \pm 3.47$ min/night (range 0.53-11.10min/night)                                                                                                                                       | Better adherence when: previous encouraging experiences with therapy, subjective symptom improvement, familiarity with medical treatments, understanding of nocturnal hypoventilation and its consequences, family and health-care team support, early adaptation to treatment<br>Poorer adherence when: previous negative experiences with therapy, negative attitude towards therapy, difficulty |

|                        |           |                   |                                                         |                                                     |              |                                                                                                                 |                                                                                                                                                                                                                        |
|------------------------|-----------|-------------------|---------------------------------------------------------|-----------------------------------------------------|--------------|-----------------------------------------------------------------------------------------------------------------|------------------------------------------------------------------------------------------------------------------------------------------------------------------------------------------------------------------------|
|                        |           |                   |                                                         |                                                     |              |                                                                                                                 | adapting, lack of support from family and health-care team, fear-embarrassment regarding treatment, technical issues, side effects, lack of subjective symptom improvement                                             |
| Hawkins et al. [19]    | USA       | J Clin Sleep Med  | Retrospective analysis of objective adherence over 1 yr | 140 children                                        | 12 ± 5.7 yrs | Good adherence: > 4h/nights > 70% nights.<br>69/140 (49%) good adherence: 7.4 ± 1.9h/night, 94 ± 0.8% of nights | Adherence is poor: female sex and developmental delay are associated with a better compliance<br>No effect of AHI, residual AHI, CPAP pressure, age; ethnicity, insurance status                                       |
| Adeleye et al. [20]    | Canada    | Canadian Respir J | Retrospective study                                     | 92 infants < 12 m with PSG, 49 were prescribed CPAP | 1-12 m       | Objective adherence in 20/49: 25% of days with > 4h/use per night                                               | Of the 92 infants (no details on those treated with CPAP), 35 Down syndrome, 9 prematurity, 9 Pierre Robin Sequence, 3 pulmonary hypertension, 6 achondroplasia, 2 Prader Willi syndrome, 2 genetic disease + 25 other |
| Machaalani et al. [21] | Australia | Sleep & Breathing | Routine clinical care over 2 yrs                        | 55 children treated with CPAP and 44 with BPAP      | 0.4-18 yrs   | Adequate adherence > 4h/night > 70% of nights<br>Adequate adherence in 75% of CPAP and 91% of BPAP users        | Better adherence with BPAP than CPAP, adherence maintained over time                                                                                                                                                   |
| Puri et al. [22]       | USA       | J Clin Sleep Med  | Retrospective chart review                              | 56 children treated with CPAP                       | 1.6-18 yrs   | Mean adherence at 3 m: 2.8 ± 2.4h/night                                                                         | Better adherence in children with a family member using CPAP (3.6 ± 0.6h/night on all nights and 4.8 ± 0.6 on nights used)                                                                                             |
| Xanthopoulos et al.    | USA       | Sleep             | Prospective study                                       | Questionnaire given at CPAP                         | 4 m-18 yrs   | Pediatric modification of the Self-Efficacy Measure for Sleep                                                   | Adherence correlated to caregiver-reported self-efficacy                                                                                                                                                               |

|                     |           |                   |                      |                                                                                           |                |                                                                                                  |                                                                                                                                                                                                                                                                                                                                                                             |
|---------------------|-----------|-------------------|----------------------|-------------------------------------------------------------------------------------------|----------------|--------------------------------------------------------------------------------------------------|-----------------------------------------------------------------------------------------------------------------------------------------------------------------------------------------------------------------------------------------------------------------------------------------------------------------------------------------------------------------------------|
| [23]                |           |                   |                      | initiation to 59 children and 138 caregivers                                              |                | Apnea questionnaire given to children treated with CPAP and their caregiver                      | (p=0.007)                                                                                                                                                                                                                                                                                                                                                                   |
| Ai-Iede et al. [24] | Australia | Sleep Med         | Retrospective study  | 148 children using CPAP at home for non OSA                                               |                | Adherence 116/130 (89%) > 4h/night                                                               | 65 primary airway disease 33 chronic lung disease, 32 congenital heart disease, 5 congenital diaphragmatic hernia, 4 interstitial lung disease<br>No details on those < 24 m<br>Mean CPAP 7.3 cmH2O<br>Follow up: telephone call, cardiorespiratory monitoring (?) at 2 weeks, CPAP titration PSG after 3-6 m<br>30% stopped CPAP during a 15 m follow up (various reasons) |
| Amaddeo et al. [25] | France    | Pediatr Pulmonol  | Retrospective study  | 31 children started on CPAP in an out-patient setting                                     | 0.8 -16.8 yrs  | 4 (3 T21) not adherent, for the others: median compliance 8h21min/night, median of 25 nights/m   | 3 patients weaned from CPAP                                                                                                                                                                                                                                                                                                                                                 |
| Trucco et al. [26]  | UK        | Pediatr Pulmonol  | Retrospective study  | 60 children with Down syndrome, 42 had SDB, 18 started on CPAP + 7 on NIV, rest on oxygen | 0.7 -5.3 yrs   | After 1.9 yrs, 11/24 had satisfactory adherence to CPAP/NIV (average 8h/night)                   | 2 children weaned from CPAP and 1 switched to NIV                                                                                                                                                                                                                                                                                                                           |
| Perriol et al. [27] | France    | Sleep & Breathing | Observational cohort | 78 children with OSA type I on home                                                       | 10.4 ± 3.4 yrs | Mean CPAP adherence at 1, 3, 6, 12, 24 m was 6.1 ± 2.8h, 6.2 ± 2.6h, 6.2 ± 2.8h, 6.3 ± 2.8h, and | No significant predictor of adherence                                                                                                                                                                                                                                                                                                                                       |

|                          |        |                  |                                                      |                                                                                                              |                          |                                                                                                                                                                                                         |                                                                                                                                                                                                                                                          |
|--------------------------|--------|------------------|------------------------------------------------------|--------------------------------------------------------------------------------------------------------------|--------------------------|---------------------------------------------------------------------------------------------------------------------------------------------------------------------------------------------------------|----------------------------------------------------------------------------------------------------------------------------------------------------------------------------------------------------------------------------------------------------------|
|                          |        | ng               |                                                      | CPAP                                                                                                         |                          | 7.0 ± 2.7 h                                                                                                                                                                                             |                                                                                                                                                                                                                                                          |
| Pascoe et al. [28]       | USA    | Pediatr Pulmonol |                                                      | 42 boys with Duchenne muscular dystrophy                                                                     | mean age 15.1 ± 20.2 yrs | % days NIV use: 56 ± 39%<br>% days with a use > 4h: 46 ± 41%<br>Average use 5.6 ± 4.2h/night                                                                                                            | Better compliance with high AHI at baseline and change vital capacity from baseline<br>Adherence barriers: internalizing problems (anxiety, depression)                                                                                                  |
| Mendoza-Ruiz et al. [29] | France | Sleep Med        | Prospective study                                    | 6 CPAP non-adherent children                                                                                 | 5 ± 5 yrs                | Use of a table based on token economy, adherence evaluated after 1 month                                                                                                                                | Mean adherence improved from 1 ± 0.33h/night to 4h31 ± 1h12 at 1 m<br>A token economy table is effective                                                                                                                                                 |
| Bergeron et al. [30]     | USA    | Laryngoscope     | Prospective single-blind randomized controlled trial | Shared Decision-Making Tools given at CPAP start to 24 families + 26 controls                                | 6.9-10.6 yrs             | Adequate adherence = > 4h/night                                                                                                                                                                         | Use of SDMT associated with a better adherence 57% for study patients vs 27% of controls.                                                                                                                                                                |
| Kang et al. [31]         | USA    | J Clin Sleep Med | Retrospective study                                  | 103 children with developmental disability (DD) and 137 typically developing (TD) children treated with CPAP | ~3.2-16.1 yrs            | % of nights use was higher in DD children at 3 m (86.7 vs 62.9) and 6 m (90 vs 70.7) vs TD<br>Hours of usage at night was similar: (5 vs 4.6) at 3 m and at 6 m (6.4 vs 5.7) for DD vs TD, respectively | % of nights use was higher in DD children at 3 and 6 m<br>Hours of usage on nights used at 3 and 6 m were similar<br>Adherence improved in both groups over time<br>Higher income and titration at or before 6 m were associated with a better adherence |

Abbreviations: m: months, yrs: years, CPAP: continuous positive airway pressure, BPAP: bilevel positive airway pressure, NIV: noninvasive ventilation, OSA: obstructive sleep apnea, NMD: neuromuscular disease, SDB: sleep disordered breathing, AHI: apnea-hypopnea index.

## References

1. Waters KA, Everett FM, Bruderer JW, *et al.* Obstructive sleep apnea: the use of nasal CPAP in 80 children. *Am J Respir Crit Care Med* 1995; 152: 780-785.
2. Marcus CL, Ward SL, Mallory GB, *et al.* Use of nasal continuous positive airway pressure as treatment of childhood obstructive sleep apnea. *J Pediatr* 1995; 127: 88-94.
3. Massa F, Gonzalez S, Lavery A, *et al.* The use of nasal continuous positive airway pressure to treat obstructive sleep apnoea. *Arch Dis Child* 2002; 87: 438-443.
4. Koontz KL, Slifer KJ, Cataldo MD, *et al.* Improving pediatric compliance with positive airway pressure therapy: The impact of behavioral intervention. *Sleep* 2003; 26: 1010-1015.
5. Marcus CL, Rosen G, Ward SLD, *et al.* Adherence to and effectiveness of positive airway pressure therapy in children with obstructive sleep apnea. *Pediatrics* 2006; 117: e442-e451.
6. O'Donnell AR, Bjornson CL, Bohn SG, *et al.* Compliance rates in children using noninvasive continuous positive airway pressure. *Sleep* 2006; 29: 651-658.
7. Uong EC, Epperson M, Bathon SA, *et al.* Adherence to nasal positive airway pressure therapy among school-aged children and adolescents with obstructive sleep apnea syndrome. *Pediatr Int* 2007; 120: e1203-e1211.
8. Nixon GM, Mihai R, Verginis N, *et al.* Patterns of continuous positive airway pressure adherence during the first 3 months of treatment in children. *J Pediatr* 2011; 159: 802-807.
9. Beebe DW, Byars KC. Adolescents with obstructive sleep apnea adhere poorly to positive airway pressure (PAP), but PAP users show improved attention and school performance. *PLoS One* 2011; 6: e16924.
10. Marcus CL, Beck SE, Traylor J, *et al.* Randomized, double-blind clinical trial of two different modes of positive airway pressure therapy on adherence and efficacy in children. *J Clin Sleep Med* 2012; 8: 37-42.
11. Marcus CL, Radcliffe J, Konstantinopoulou S, *et al.* Effects of positive airway pressure therapy on neurobehavioral outcomes in children with obstructive sleep apnea. *Am J Respir Crit Care Med* 2012; 185: 998-1003.
12. Simon SL, Duncan CL, Janicke DM, *et al.* Barriers to treatment of paediatric obstructive sleep apnoea: Development of the adherence barriers to continuous positive airway pressure (CPAP) questionnaire. *Sleep Med* 2012; 13: 172-177.
13. DiFeo N, Meltzer LJ, Beck SE, *et al.* Predictors of positive airway pressure therapy adherence in children: a prospective study. *J Clin Sleep Med* 2012; 8: 279-286.
14. Nathan AM, Tang JPL, Goh A, *et al.* Compliance with noninvasive home ventilation in children with obstructive sleep apnoea. *Singapore Med J* 2013; 54: 678-682.

15. Prashad PS, Marcus CL, Maggs J, *et al.* Investigating reasons for CPAP adherence in adolescents: a qualitative approach. *J Clin Sleep Med* 2013; 9: 1303-1313.
16. Jambhekar SK, Com G, Tang X, *et al.* Role of a respiratory therapist in improving adherence to positive airway pressure treatment in a pediatric sleep apnea clinic. *Respir Care* 2013; 58: 2038-2044.
17. Ramirez A, Khirani S, Aloui S, *et al.* Continuous positive airway pressure and noninvasive ventilation adherence in children. *Sleep Med* 2013; 14: 1290-1294.
18. Ennis J, Rohde K, Chaput JP, *et al.* Facilitators and barriers to noninvasive ventilation adherence in youth with nocturnal hypoventilation secondary to obesity or neuromuscular disease. *J Clin Sleep Med* 2015; 11: 1409-1416.
19. Hawkins SM, Jensen EL, Simon SL, *et al.* Correlates of pediatric CPAP adherence. *J Clin Sleep Med* 2016; 12: 879-884.
20. Adeleye A, Ho A, Nettel-Aguirre A, *et al.* Noninvasive positive airway pressure treatment in children less than 12 months of age. *Can Respir J* 2016; 2016: 7654631.
21. Machaalani R, Evans CA, Waters KA. Objective adherence to positive airway pressure therapy in an Australian paediatric cohort. *Sleep Breath* 2016; 20: 1327-1336.
22. Puri P, Ross KR, Mehra R, *et al.* Pediatric positive airway pressure adherence in obstructive sleep apnea enhanced by family member positive airway pressure usage. *J Clin Sleep Med* 2016; 12: 959-963.
23. Xanthopoulos MS, Kim JY, Blechner M, *et al.* Self-efficacy and short-term adherence to continuous positive airway pressure treatment in children. *Sleep* 2017; 40:
24. Al-Iede M, Kumaran R, Waters K. Home continuous positive airway pressure for cardiopulmonary indications in infants and children. *Sleep Med* 2018; 48: 86-92.
25. Amaddeo A, Frapin A, Touil S, *et al.* Outpatient initiation of long-term continuous positive airway pressure in children. *Pediatr Pulmonol* 2018; 53: 1422-1428.
26. Trucco F, Chatwin M, Semple T, *et al.* Sleep disordered breathing and ventilatory support in children with Down syndrome. *Pediatr Pulmonol* 2018; 53: 1414-1421.
27. Perriol MP, Jullian-Desayes I, Joyeux-Faure M, *et al.* Long-term adherence to ambulatory initiated continuous positive airway pressure in non-syndromic OSA children. *Sleep Breath* 2019; 23: 575-578.
28. Pascoe JE, Sawnani H, Hater B, *et al.* Understanding adherence to noninvasive ventilation in youth with Duchenne muscular dystrophy. *Pediatr Pulmonol* 2019; 54: 2035-2043.
29. Mendoza-Ruiz A, Dylgjeri S, Bour F, *et al.* Evaluation of the efficacy of a dedicated table to improve CPAP adherence in children: a pilot study. *Sleep Med* 2019; 53: 60-64.
- 30.
31. Kang EK, Xanthopoulos MS, Kim JY, *et al.* Adherence to positive airway pressure for the treatment of obstructive sleep apnea in children with developmental disabilities. *J Clin Sleep Med* 2019; 15: 915-921.
