# Supplementary material
Source: HighWire-hosted journal article supplement (https://erj.ersjournals.com/content/59/6/2101404)
Supplement: inline-supplementary-material-13 [file inline-supplementary-material-13.pdf]

**Online Table S5.3:** Benefits of CPAP (except decrease in AHI)

| Author               | Country   | Journal      | Study design      | Number of patients                                                                   | Ages       | Benefits                                                                                                                                                                                                                                                                                                                                                                                                  |
|----------------------|-----------|--------------|-------------------|--------------------------------------------------------------------------------------|------------|-----------------------------------------------------------------------------------------------------------------------------------------------------------------------------------------------------------------------------------------------------------------------------------------------------------------------------------------------------------------------------------------------------------|
| Rains et al. [1]     | USA       | Clin Pediatr | Descriptive study | 4 children: Down syndrome, Hurler disease, Hunter disease, Treacher Collins syndrome | 3 - 12 yrs | Clinical observation of improved alertness, attention/concentration, and behavior/temperament in all 4 children                                                                                                                                                                                                                                                                                           |
| Johnstone et al. [2] | Australia | Sleep Med    | Prospective study | 19 children with ADHD and SDB                                                        | 7 – 15 yrs | EEG before and after 6 m of CPAP<br>13/19 compliant with CPAP (use 6- 10h/night): IAH 1.4 - 4.2/h<br>Children treated with CPAP had a decrease in slow wave (delta and theta) and an increase in fast wave (beta) EEG activity<br>In children with ADHD and SDB, CPAP is associated with some improvement in the typical EEG features of ADHD                                                             |
| Beebe et al. [3]     | USA       | Plos One     | Prospective study | 13 obese children with OSA + 15 obese controls without OSA                           | 10-16 yrs  | 13 obese with OSA all treated with CPAP: 6 CPAP users + 7 CPAP non-adherent<br>Academic function: self-report on grades + parent and self-report on scholastic functioning on PedQL 4.0 Generic<br>Attention: age-normed Total Corrected z-score on the computerized Gordon Diagnostic System<br>Non-adherent: worsening functioning over time<br>CPAP-adherent: improved attention and academic function |
| Marcus et al. [4]    | USA       | AJRCC M      | Prospective study | 52 children after 3 m of CPAP                                                        | 12 ± 4 yrs | Neurobehavioral assessment before and at 3 m of CPAP<br>Significant improvement in attention deficits (ADHD by Connors Abbreviated Symptoms Questionnaire + Attention Problems subscale on the Child Behavior Checklist: CBCL), sleepiness, behavior (on CBCL) and caregiver and child-reported QoL (on PedQL) and on OSAS-related symptoms and disease-specific QoL (on OSAS-18)                         |

|                              |     |                   |                               |                                                                   |              |                                                                                                                                                                                                                                                                                                                                             |
|------------------------------|-----|-------------------|-------------------------------|-------------------------------------------------------------------|--------------|---------------------------------------------------------------------------------------------------------------------------------------------------------------------------------------------------------------------------------------------------------------------------------------------------------------------------------------------|
|                              |     |                   |                               |                                                                   |              | Positive correlation between adherence and decrease in sleepiness but not with behavioral outcomes                                                                                                                                                                                                                                          |
| Brooks et al. [5]            | USA | Sleep & Breathing | Prospective study             | 23 children with Down syndrome, 10 had an AHI > 5/h               | 7.2-18.7 yrs | 7 children treated with CPAP: CPAP effective in 5<br>Improvement in attention (Connors Hyperactivity test) in all 5 (p< 0.05)                                                                                                                                                                                                               |
| Konstantinopoulou et al. [6] | USA | Sleep Med         | Prospective randomized study  | 23 children with Down syndrome, 20 had OSA                        | 8-19 yrs     | 9 patients randomized to CPAP, 11 to sham-CPAP (2 cmH <sub>2</sub> O)<br>Median CPAP use: 116 (70-139) min/night<br>Duration of CPAP use:<br>Negatively correlated with E/e' mitral lateral (reflects left ventricular (LV) diastolic dysfunction, higher index reflects greater dysfunction)<br>Positively correlated with LV mass z-score |
| Katz et al. [7]              | USA | J Clin Sleep Med  | Prospective multicenter study | 27 obese children treated with CPAP                               | 8-16 yrs     | At baseline: 10/25 (40%) had HOMA-IR (homeostasis model assessment of insulin resistance > 97 <sup>th</sup> perc. 10/23 (44%) hypertension, 16/23 (70%) loss of nocturnal blood pressure dip, high sensitive-CRP was elevated in 16/27 (64%)<br>No change in any outcome at 3 and 6 m between CPAP-adherent and non-adherent                |
| Delrosso et al. [8]          | USA | J Pediatr         | Retrospective chart review    | 3 groups of 25 children: snorers, untreated OSA, CPAP-treated OSA | 7-17 yrs     | OSA: AHI between 4.3-22/h<br>CPAP patients had higher body mass index than snorers and non-CPAP OSA patients<br>Systolic blood pressure was higher in the 2 OSA groups vs snorers<br>Systolic blood pressure decreased in the CPAP group after 6 m of CPAP                                                                                  |

Abbreviations: m: months, yrs: years, ADHD: attention-deficit hyperactivity disorder, EEG: electroencephalography, CPAP: continuous positive airway pressure, NIV: noninvasive ventilation, SDB: sleep-disordered breathing, OSA: obstructive sleep apnea, AHI: apnea-hypopnea index.

## References

1. Rains JC. Treatment of obstructive sleep apnea in pediatric patients. Behavioral intervention for compliance with nasal continuous positive airway pressure. *Clin Pediatr* 1995; 34: 535-541.
2. Johnstone SJ, Tardif HP, Barry RJ, *et al*. Nasal bilevel positive airway pressure therapy in children with a sleep-related breathing disorder and attention-deficit hyperactivity disorder: effects on electrophysiological measures of brain function. *Sleep Med* 2001; 2: 407-416.
3. Beebe DW, Byars KC. Adolescents with obstructive sleep apnea adhere poorly to positive airway pressure (PAP), but PAP users show improved attention and school performance. *PLoS One* 2011; 6: e16924.
4. Marcus CL, Radcliffe J, Konstantinopoulou S, *et al*. Effects of positive airway pressure therapy on neurobehavioral outcomes in children with obstructive sleep apnea. *Am J Respir Crit Care Med* 2012; 185: 998-1003.
5. Brooks LJ, Olsen MN, Bacevice AM, *et al*. Relationship between sleep, sleep apnea, and neuropsychological function in children with Down syndrome. *Sleep Breath* 2015; 19: 197-204.
6. Konstantinopoulou S, Tapia IE, Kim JY, *et al*. Relationship between obstructive sleep apnea cardiac complications and sleepiness in children with Down syndrome. *Sleep Med* 2016; 17: 18-24.
7. Katz SL, MacLean JE, Hoey L, *et al*. Insulin resistance and hypertension in obese youth with sleep-disordered breathing treated with positive airway pressure: A prospective multicenter study. *J Clin Sleep Med* 2017; 13: 1039-1047.
8. DelRosso LM, King J, Ferri R. Systolic blood pressure elevation in children with obstructive sleep apnea Is Improved with positive airway pressure use. *J Pediatr* 2018; 195: 102-107 e101.
