# Supplementary material
Source: HighWire-hosted journal article supplement (https://erj.ersjournals.com/content/59/6/2101404)
Supplement: inline-supplementary-material-14 [file inline-supplementary-material-14.pdf]

**Online Table S5.4:** Benefits of NIV (except decrease in AHI)

| Author                 | Country  | Journal              | Study design        | Number of patients                                                | Ages            | Benefits                                                                                                                                                                                                                       |
|------------------------|----------|----------------------|---------------------|-------------------------------------------------------------------|-----------------|--------------------------------------------------------------------------------------------------------------------------------------------------------------------------------------------------------------------------------|
| Bach et al. [1]        | USA      | Pediatr Pulmonol     | Retrospective study | 56 SMA I                                                          | RF before 2 yrs | 33 treated with NIV vs 16 treated with tracheotomy<br>31/33 survived to $42 \pm 26$ m, fewer hospitalisations > 5 yrs with NIV vs tracheotomy                                                                                  |
| Bach et al. [2]        | USA      | Am J Phys Med Rehab  | 2 cases             | 2 SMA I                                                           | 7 m, 3 yrs      | No pectus excavatum, survival until 7 and 3 yrs with NIV 24h/24                                                                                                                                                                |
| Mellies et al. [3]     | Germany  | Neuromuscul Disord   | Prospective study   | 7 infants SMA I (6) and SMA II (1) (+ 6 SMA controls without NIV) | 6-11 yrs        | After 6-12 m of NIV: improvement in SDB symptoms, sleep quality and architecture vs no improvement in controls                                                                                                                 |
| Bach et al. [4]        | USA      | Am J Phys Med Rehab  | Retrospective study | 106 SMA I                                                         | ?               | Untreated died at $9.6 \pm 4$ m, 22 with tracheotomy survived at $70.5 \pm 43.3$ m, 47 treated with NIV, 29/47 reached $65.2 \pm 45.8$ m, 8 died<br>Same survival with NIV and tracheotomy but fewer hospitalisations with NIV |
| Vasconcelos et al. [5] | Portugal | Revista Port Pneumol | Retrospective study | 7 SMA I, 11 SMA II, 4 SMA III                                     | 6 m – 26 yrs    | 17/22 treated with NIV<br>NIV associated with a decrease in chest deformity and ARF episodes                                                                                                                                   |

|                       |       |                       |                               |                                                    |               |                                                                                                                                                                                                                                                          |
|-----------------------|-------|-----------------------|-------------------------------|----------------------------------------------------|---------------|----------------------------------------------------------------------------------------------------------------------------------------------------------------------------------------------------------------------------------------------------------|
| Chatwin et al. [6]    | UK    | Arch Dis Child        | Retrospective study           | 13 SMA I                                           | 4 – 24 m      | All treated with NIV + MI-E, 5 died, duration of NIV not specified<br>NIV + MI-E associated with a decrease in chest deformity                                                                                                                           |
| Ottonello et al. [7]  | Italy | Am J Phys Med Rehab   | Retrospective study           | 16 infants with SMA I                              | < 3 yrs       | All treated with NIV<br>NIV associated with a reduction in ARF episodes                                                                                                                                                                                  |
| Lemoine et al. [8]    | USA   | Pediatr Crit Care Med | Retrospective study           | 49 infants with SMA I                              | 1 – 7 m       | All treated with NIV<br>Longer survival in the pro-active (n=26, BPAP + MI-E) vs supportive group (n=23, suctioning ± O <sub>2</sub> )                                                                                                                   |
| Gregoretta et al. [9] | Italy | Pediatrics            | Retrospective study 1999-2010 | 194 infants with SMA I                             |               | 31 (16%) treated with NIV<br>Nearly all non treated patients died < 2 yrs<br>Survival at 24 m: 95% for IV vs 68% with NIV<br>Survival at 48 m: 89% for IV and 45% with NIV<br>Longer survival with NIV as compared to no respiratory support             |
| Verrillo et al. [10]  | Italy | Sleep Med             | Prospective study             | 9 children with SMA II + 15 healthy controls       | 2.2 - 8.1 yrs | PSG during before and with NIV (after a mean of 2 yrs of NIV)<br>NIV associated with a decrease in awakenings + increase in >% of N2 sleep satge<br>NIV associated with a decrease in cyclic-alternating pattern A1 duration and an increase in A3 index |
| Ishikawa et al. [11]  | Japan | Neuromuscul Disord    | Retrospective study           | 3 cohorts of Duchenne: untreated, tracheotomy, NIV |               | 88 treated with NIV<br>Longer survival with NIV (mean 39.6 yrs)                                                                                                                                                                                          |

|                      |         |                    |                                             |                                                |                                  |                                                                                                                                                                                                                                                  |
|----------------------|---------|--------------------|---------------------------------------------|------------------------------------------------|----------------------------------|--------------------------------------------------------------------------------------------------------------------------------------------------------------------------------------------------------------------------------------------------|
| Eagle et al. [12]    | UK      | Neuromuscul Disord | Retrospective study 1 center 1967-2002      | 197 patients with Duchenne                     |                                  | Improvement in survival<br>1960s: mean age of death = 14.4 yrs<br>In 1990 with NIV: 25.3 yrs                                                                                                                                                     |
| Lee et al. [13]      | Korea   | Korean J Pediatr   | Retrospective study at one center 2010-2016 | 54 patients with Duchenne, 24 treated with NIV | NIV treated: mean 16.3 ± 1.9 yrs | Improved cardiac function in the NIV patients<br>As compared to the no-NIV group, the NIV group had (better):<br>Lower early ventricular filling velocity (VFV)/late VFV<br>Higher tissue Doppler systolic S' (i.e. better LV systolic function) |
| LoMauro et al. [14]  | Italy   | Eur Respir J       | 7 yr retrospective study                    | 115 patients with Duchenne                     | 6-24 yrs                         | 28/115 treated with NIV<br>NIV associated with a transient (2 yrs) increase in % vital capacity and contribution of the abdomen to the vital volume (VAB% VT) before coming comparable to the no-NIV pts                                         |
| Mellies et al. [15]  | Germany | Neurology          | Retrospective study                         | 7 patients with juvenile Pompe disease         | 3 – 27 yrs                       | 2/7 treated with NIV<br>NIV improves nocturnal and daytime gas exchange                                                                                                                                                                          |
| Nabatame et al. [16] | Japan   | Brain Dev          | Retrospective study                         | 4 juvenile Pompe disease                       | 9 – 15 yrs                       | 3/4 treated with NIV<br>With NIV: no ARF and resumption of SDB symptoms                                                                                                                                                                          |
| Khan et al. [17]     | UK      | Arch Dis Child     | Retrospective study                         | 4 congenital myopathy, 2 congenital            | 6 – 13 yrs                       | All treated with NIV<br>NIV improves SDB symptoms, decreases WASO, increases SpO <sub>2</sub>                                                                                                                                                    |

|                           |         |                  |                          |                                               |                |                                                                                                                                                                                                                                                                                                                                                                                                  |
|---------------------------|---------|------------------|--------------------------|-----------------------------------------------|----------------|--------------------------------------------------------------------------------------------------------------------------------------------------------------------------------------------------------------------------------------------------------------------------------------------------------------------------------------------------------------------------------------------------|
|                           |         |                  |                          | muscular dystrophy, 2 rigid spine             |                |                                                                                                                                                                                                                                                                                                                                                                                                  |
| Simonds et al. [18]       | UK      | Eur Respir J     | Retrospective study      | 40 children with NMD or skeletal disease      | 9 mo 16 yrs    | 38/40 tolerated NIV<br>NIV associated with an improvement in nocturnal PtcCO <sub>2</sub> and SpO <sub>2</sub> and daytime blood gases                                                                                                                                                                                                                                                           |
| Mellies et al. [19]       | Germany | Eur Respir J     | Prospective study        | 30 children with progressive NMD              | 12.3 ± 4.1 yrs | NIV normalized daytime and nocturnal gas exchange, improved RDI + arousal index, decreased nocturnal heart rate, decreased light sleep, and increased slow wave sleep.<br>10 patients were also studied with and after 3 nights without NIV: NIV withdrawal was associated with a prompt deterioration of SDB and gas exchange back to baseline but resolved immediately after resumption of NIV |
| Dohna-Schwake et al. [20] | Germany | Pediatr Pulmonol | Retrospective study      | 12 children with NMD treated with NIV > 5 yrs |                | As compared with the yr before NIV, after NIV: decrease in the number of GP consultations for RTI; number of antibiotic treatments and number of hospital admissions due to RTI                                                                                                                                                                                                                  |
| Katz et al. [21]          | Canada  | Arch Dis Child   | Prospective cohort study | 46 children with progressive NMD              | 6 - 17 yrs     | 7/46 had nocturnal hypoventilation (NH: increase in PetCO <sub>2</sub> > 10 mmHg ± decrease in SpO <sub>2</sub> > 5% for > 10 min): 6 treated with NIV<br>After one year of NIV (5 patients): greater decrease in the general perception of health status of the Child Health Questionnaire (CHQ-PF50) as compared to the                                                                        |

|                         |        |                   |                     |                                                         |            |                                                                                                                                                                                                                                                                                                                                                                                                                                                                                                |
|-------------------------|--------|-------------------|---------------------|---------------------------------------------------------|------------|------------------------------------------------------------------------------------------------------------------------------------------------------------------------------------------------------------------------------------------------------------------------------------------------------------------------------------------------------------------------------------------------------------------------------------------------------------------------------------------------|
|                         |        |                   |                     |                                                         |            | children without NH                                                                                                                                                                                                                                                                                                                                                                                                                                                                            |
| Zaman-Haque et al. [22] | Canada | Child Neurol Open | Retrospective study | 7 children with NMD and 7 with CNS disease              |            | CNS: Trisomy 18, Prader Willi syndrome, Leigh sd, cerebral palsy<br>No change in the number of pneumonias 2 yrs before and after the start of NIV                                                                                                                                                                                                                                                                                                                                              |
| Padman et al. [23]      | USA    | Pediatr Pulmonol  | Retrospective study | 15 children with ARF treated with BPAP: 4 CF and 11 NMD | 4 - 21 yrs | 1 BPAP failure (1 patient with NMD)<br>In other patients: duration of BPAP 1 day to 21 m<br>Decrease in the number of hospitalisation days in the yr after BPAP initiation vs the yr before: 6 vs 36 days/yr                                                                                                                                                                                                                                                                                   |
| Fauroux et al. [24]     | France | Pediatr Crit Care | Retrospective study | 15 children who were decannulated and had a relapse OSA | 2 – 12 yrs | Pathologies: upper airway obstruction (n=13), congenital diaphragmatic hypoplasia (n=1) or lung disease (n=1)<br>In 9 patients, NIV was started after recurrence of obstructive symptoms after a delay of 1 to 48 m following a successful immediate decannulation. NIV was anticipated in 6 patients who failed repeated decannulation trials because of poor clinical tolerance of tracheal tube removal or tube closure during sleep<br>NIV avoids re-cannulation in case of relapse of OSA |

Abbreviations: m: months, yrs: years, SMA: spinal muscular atrophy, RF: respiratory failure, ARF: acute respiratory failure, NIV: noninvasive ventilation, MI-E: mechanical insufflation-exsufflation, IV: invasive ventilation, NMD: neuromuscular disease, CNS: central nervous system, CF: cystic fibrosis, BPAP: bilevel positive airway pressure, O<sub>2</sub>: oxygen, OSA: obstructive sleep apnea, GP: general practitioner, PSG: polysomnography, WASO: wake after sleep onset, SpO<sub>2</sub>: pulse oximetry, RDI: respiratory disturbance index, RTI: respiratory tract infection.

## References

1. Bach JR, Baird JS, Plosky D, *et al.* Spinal muscular atrophy type 1: management and outcomes. *Pediatr Pulmonol* 2002; 34: 16-22.
2. Bach JR, Bianchi C. Prevention of pectus excavatum for children with spinal muscular atrophy type 1. *Am J Phys Med Rehabil* 2003; 82: 815-819.
3. Mellies U, Dohna-Schwake C, Stehling F, *et al.* Sleep disordered breathing in spinal muscular atrophy. *Neuromuscul Disord* 2004; 14: 797-803.
4. Bach JR, Saltstein K, Siquee D, *et al.* Long-term survival in Werdnig-Hoffmann disease. *Am J Phys Med Rehabil* 2007; 86: 339-345.
5. Vasconcelos M, Fineza I, Felix M, *et al.* Spinal muscular atrophy--noninvasive ventilatory support in pediatrics. *Rev Port Pneumol* 2005; 11: 443-455.
6. Chatwin M, Bush A, Simonds AK. Outcome of goal-directed non-invasive ventilation and mechanical insufflation/exsufflation in spinal muscular atrophy type I. *Arch Dis Child* 2011; 96: 426-432.
7. Ottonello G, Mastella C, Franceschi A, *et al.* Spinal muscular atrophy type 1: avoidance of hospitalization by respiratory muscle support. *Am J Phys Med Rehabil* 2011; 90: 895-900.
8. Lemoine TJ, Swoboda KJ, Bratton SL, *et al.* Spinal muscular atrophy type 1: are proactive respiratory interventions associated with longer survival? *Pediatr Crit Care Med* 2012; 13: e161-165.
9. Gregoret C, Ottonello G, Chiarini Testa MB, *et al.* Survival of patients with spinal muscular atrophy type 1. *Pediatrics* 2013; 131: e1509-e1514.
10. Verrillo E, Pavone M, Bruni O, *et al.* Effects of long-term non-invasive ventilation on sleep structure in children with spinal muscular atrophy type 2. *Sleep Med* 2019; 58: 82-87.
11. Ishikawa Y, Miura T, Ishikawa Y, *et al.* Duchenne muscular dystrophy: survival by cardio-respiratory interventions. *Neuromuscul Disord* 2011; 21: 47-51.
12. Eagle M, Baudouin SV, Chandler C, *et al.* Survival in Duchenne muscular dystrophy: Improvements in life expectancy since 1967 and the impact of home nocturnal ventilation. *Neuromuscul Disord* 2002; 12: 926-929.
13. Lee S, Lee H, Eun LY, *et al.* Cardiac function associated with home ventilator care in Duchenne muscular dystrophy. *Korean J Pediatr* 2018; 61: 59-63.
14. LoMauro A, Romei M, Gandossini S, *et al.* Evolution of respiratory function in Duchenne muscular dystrophy from childhood to adulthood. *Eur Respir J* 2018; 51:
15. Mellies U, Ragette R, Schwake C, *et al.* Sleep-disordered breathing and respiratory failure in acid maltase deficiency. *Neurology* 2001; 57: 1290-1295.
16. Nabatame S, Taniike M, Sakai N, *et al.* Sleep disordered breathing in childhood-onset acid maltase deficiency. *Brain Dev* 2009; 31: 234-239.

17. Khan Y, Heckmatt JZ, Dubowitz V. Sleep studies and supportive ventilatory treatment in patients with congenital muscle disorders. *Arch Dis Child* 1996; 74: 195-200.
18. Simonds AK, Ward S, Heather S, *et al.* Outcome of paediatric domiciliary mask ventilation in neuromuscular and skeletal disease. *Eur Respir J* 2000; 16: 476-481.
19. Mellies U, Ragette R, Dohna Schwake C, *et al.* Long-term noninvasive ventilation in children and adolescents with neuromuscular disorders. *Eur Respir J* 2003; 22: 631-636.
20. Dohna-Schwake C, Podlewski P, Voit T, *et al.* Non-invasive ventilation reduces respiratory tract infections in children with neuromuscular disorders. *Pediatr Pulmonol* 2008; 43: 67-71.
21. Katz SL, Gaboury I, Keilty K, *et al.* Nocturnal hypoventilation: predictors and outcomes in childhood progressive neuromuscular disease. *Arch Dis Child* 2010; 95: 998-1003.
22. Zaman-Haque A, Campbell C, Radhakrishnan D. The effect of noninvasive positive pressure ventilation on pneumonia hospitalizations in children with neurological disease. *Child Neurol Open* 2017; 4: 2329048X16689021.
23. Padman R, Lawless S, Von Nessen S. Use of BiPAP by nasal mask in the treatment of respiratory insufficiency in pediatric patients: preliminary investigation. *Pediatr Pulmonol* 1994; 17: 119-123.
24. Fauroux B, Leboulanger N, Roger G, *et al.* Noninvasive positive-pressure ventilation avoids recannulation and facilitates early weaning from tracheotomy in children. *Pediatr Crit Care Med* 2010; 11: 31-37.
