# Supplementary material
Source: HighWire-hosted journal article supplement (https://erj.ersjournals.com/content/59/6/2101404)
Supplement: inline-supplementary-material-15 [file inline-supplementary-material-15.pdf]

**Online Table S6.1:** Which patients may benefit from a weaning trial ?

| Author             | Country         | Journal                          | Type of study                                   | Number of patients                                                                     | Patients weaned                                                                                                                                                                              |
|--------------------|-----------------|----------------------------------|-------------------------------------------------|----------------------------------------------------------------------------------------|----------------------------------------------------------------------------------------------------------------------------------------------------------------------------------------------|
| McNamara al. [1]   | Australia       | Chest                            | Prospective cohort                              | 24 infants treated with CPAP                                                           | 13/24 infants could be weaned form CPAP: 11 history of ALTE, 1 choanal atresia, 1 Smith-Lemli-Optiz sd after vascular ring surgery<br>Parents reported decreased compliance in these infants |
| Downey et al. [2]  | USA             | Chest                            | Retrospective study at 1 center 1992-1999       | 18 infants < 2 yrs treated with CPAP                                                   | 8/18 infants could be weaned from CPAP                                                                                                                                                       |
| Edwards et al. [3] | Australia       | J Ped Child Health               | Retrospective study at 1 center 1991-2004       | 108 children treated with CPAP + 47 NIV                                                | 61/108 improved after 3-52 m: airway malacia, CLD, neonatal diaphragmatic weakness, ARF with lung disease (no more details)                                                                  |
| Nelson et al. [4]  | USA             | J Oral Maxillofacial Surgery     | Retrospective study                             | 25 children with syndromic bilateral coronal synostosis who had Lefort III distraction | 6/9 patients treated with CPAP could discontinue CPAP after Lefort III                                                                                                                       |
| Bannink at al. [5] | The Netherlands | Int J Oral Maxillofacial Surgery | Retrospective study at 1 center                 | 11 children treated with CPAP for craniofaciostenosis                                  | After mid-face advancement, 6/11 patients could be weaned for CPAP (CPAP or tracheotomy was maintained in 5)                                                                                 |
| Rosen [6]          | USA             | Clin Pediatr                     | Retrospective cohort                            | 29 infants < 2 yrs with Down syndrome, 6 treated with CPAP                             | 3/6 had no OSA on a repeat PSG after 5, 5, and 110 m and could be weaned form CPAP                                                                                                           |
| Tibbals et al. [7] | Australia       | J Ped Child Health               | Longitudinal study (1979-2008) in one center in | 168 children, 58 (35%) CPAP, 50 (60%) BPAP                                             | 25 (15%) could be weaned from ventilatory support                                                                                                                                            |

|                      |           |                                |                                                  |                                                      |                                                                                                                                                                                                                                                                                                                                         |
|----------------------|-----------|--------------------------------|--------------------------------------------------|------------------------------------------------------|-----------------------------------------------------------------------------------------------------------------------------------------------------------------------------------------------------------------------------------------------------------------------------------------------------------------------------------------|
|                      |           |                                | Melbourne                                        |                                                      |                                                                                                                                                                                                                                                                                                                                         |
| McDougall et al. [8] | Canada    | Arch Dis Child                 | Prospective study in one center / 15 yrs         | 144 children started on NIV                          | 28/144 (19%) discontinued NIV: 7 NMD, 3 spinal injury, 5 abnormal ventilatory control, 5 craniofacial malformation, 4 airway malacia, 4 other<br>Weaning incidence at 5-yrs: 21%, 42% at 10 yrs<br>Time to weaning: 1.9 (0.2-11.5) years<br>Weaning less common in NMD                                                                  |
| Girbal et al. [9]    | Portugal  | Revista Portuguesa Pneumologia | Retrospective cohort at 1 center 1997-2012       | 68 children with complex OSA, 52 on CPAP, 16 on BPAP | 22/68 could be weaned: 17 spontaneous improvement, 5 after surgery<br>Even patients with complex OSA may be weaned from CPAP by time                                                                                                                                                                                                    |
| Chatwin et al. [10]  | UK        | Plos One                       | Retrospective cohort at 1 center                 | 496 children on home NIV (follow up data on 449)     | 42/449 (9%) could be weaned from NIV: 2 chest wall, 1 obesity, 6 CLD, 4 congenital syndrome, 4 upper airway obstruction, 4 NMD, 5 other (+ 5 ventilator intolerance, 5 mask intolerance)                                                                                                                                                |
| Chau et al. [11]     | Hong Kong | Respir Care                    | Retrospective cohort study at 1 center 1997-2015 | 96 children < 21 yrs, 71 treated with NIV            | 7 (8%) children treated with NIV could be weaned due to “improvement of chronic lung disease or underlying airway problems”                                                                                                                                                                                                             |
| Kherani et al. [12]  | Canada    | Pediatr Pulmonol               | Retrospective study                              | 25 infants < 12 m treated with NIV                   | 2 CCHS, 1 other CNS, 14 NMD, 3 CLD, 2 airway malacia, 1 diaphragm paralysis, 1 pulmonary atresia, 1 OSA<br>7/28 (28%) could be weaned from NIV                                                                                                                                                                                          |
| Mastouri et al. [13] | France    | Pediatr Pulmonol               | Retrospective cohort at 1 center 2013-2016       | 58/213 (27%) could be weaned: 50 CPAP + 8 NIV        | Description of major and minor weaning criteria.<br>Diagnosis: 9 laryngeal anomaly, 6 Pierre Robin, 6 Prader Willi syndrome, 6 Treacher Collins syndrome, 4 CLD, 3 achondroplasia, 3 OSA, 2 craniofaciostenosis, 2 pycnodysostosis, 2 mucopolysaccharidosis, polymalformative syndrome, 2 mandibular hypoplasia, 2 lung disease + other |
| Ikeda et al. [14]    | Japan     | Brain Dev                      | Retrospective cohort study                       | 63 children < 20 yrs                                 | 3 (6%) children could be weaned due to “improvement of respiration”                                                                                                                                                                                                                                                                     |

|                            |           |                   |                                                 |                                                                   |                                                                                                                                                                                                                                                                                      |
|----------------------------|-----------|-------------------|-------------------------------------------------|-------------------------------------------------------------------|--------------------------------------------------------------------------------------------------------------------------------------------------------------------------------------------------------------------------------------------------------------------------------------|
|                            |           |                   | at 1 center<br>2001-2015                        |                                                                   |                                                                                                                                                                                                                                                                                      |
| Castro-Codesal et al. [15] | Canada    | Plos One          | Retrospective cohort study in Alberta 2005-2014 | 622 children < 18 yrs                                             | 39% of children could be weaned after 3-105 m of NIV due to spontaneous improvement in 16%                                                                                                                                                                                           |
| Al-Iede et al. [16]        | Australia | Sleep Med         | Retrospective study                             | 148 children treated with CPAP for cardiorespiratory disorder     | 6/148 could be weaned from CPAP / 15 m follow up due to improvement                                                                                                                                                                                                                  |
| Amaddeo et al. [17]        | France    | Pediatr Pulmonol  | Retrospective study                             | 31 children started on CPAP in an out-patient setting             | 3/31 children could be weaned from CPAP during a mean follow up of 12.3 m (2.2 - 258.2 m)<br>1 patient with mucopolysaccharidosis improved after mandibular distraction osteogenesis<br>Spontaneous improvement in 1 patient with 22q11 and 1 patient with polymalformative syndrome |
| King et al. [18]           | Australia | J Clin Sleep Med  | Retrospective cohort at 1 center 2016-2017      | 24 children (1-10.5 yrs) could be weaned during a 2 yrs follow up | 11 spontaneous improvement, 7 airway surgery, 2 decrease in body mass index, 4 low physician perceived benefit (no symptoms and normal PSG)                                                                                                                                          |
| Perriol et al. [19]        | France    | Sleep & Breathing | Observational cohort over 2 yrs                 | 78 children (10.4 ± 3.2 yrs) with OSA type I initiated on CPAP    | Weaning: 6 at 3 m, 15 at 6 m, 23 at 12 m, 44 at 24 m thanks to rehabilitation programs, dentofacial orthopedics ± weight loss                                                                                                                                                        |

Abbreviations: m: months, yrs: years, CPAP: continuous positive airway pressure, BPAP: bilevel positive airway pressure, NIV: noninvasive ventilation, ALTE: acute life-threatening event, ARF: acute respiratory failure, OSA: obstructive sleep apnea, PSG: polysomnography, NMD: neuromuscular disease, CNS: central nervous system, CCHS: central congenital hypoventilation syndrome, chronic lung disease.

## References

1. McNamara F, Sullivan CE. Obstructive sleep apnea in infants and its management with nasal continuous positive airway pressure. *Chest* 1999; 116: 10-16.
2. Downey R, 3rd, Perkin RM, MacQuarrie J. Nasal continuous positive airway pressure use in children with obstructive sleep apnea younger than 2 years of age. *Chest* 2000; 117: 1608-1612.
3. Edwards EA, Hsiao K, Nixon GM. Paediatric home ventilatory support: the Auckland experience. *J Paediatr Child Health* 2005; 41: 652-658.
4. Nelson TE, Mulliken JB, Padwa BL. Effect of midfacial distraction on the obstructed airway in patients with syndromic bilateral coronal synostosis. *J Oral Maxillofac Surg* 2008; 66: 2318-2321.
5. Bannink N, Nout E, Wolvius EB, *et al.* Obstructive sleep apnea in children with syndromic craniosynostosis: long-term respiratory outcome of midface advancement. *Int J Oral Maxillofac Surg* 2010; 39: 115-121.
6. Rosen D. Some infants with Down syndrome spontaneously outgrow their obstructive sleep apnea. *Clin Pediatr* 2010; 49: 1068-1071.
7. Tibballs J, Henning R, Robertson CF, *et al.* A home respiratory support programme for children by parents and layperson carers. *J Paediatr Child Health* 2010; 46: 57-62.
8. McDougall CM, Adderley RJ, Wensley DF, *et al.* Long-term ventilation in children: longitudinal trends and outcomes. *Arch Dis Child* 2013; 98: 660-665.
9. Girbal IC, Goncalves C, Nunes T, *et al.* Non-invasive ventilation in complex obstructive sleep apnea--a 15-year experience of a pediatric tertiary center. *Rev Port Pneumol* 2014; 20: 146-151.
10. Chatwin M, Tan HL, Bush A, *et al.* Long term non-invasive ventilation in children: impact on survival and transition to adult care. *PLoS One* 2015; 10: e0125839.
11. Chau SK, Yung AW, Lee SL. Long-term management for ventilator-assisted children in Hong Kong: 2 decades' experience. *Respir Care* 2017; 62: 54-64.
12. Kherani T, Sayal A, Al-Saleh S, *et al.* A comparison of invasive and noninvasive ventilation in children less than 1 year of age: A long-term follow-up study. *Pediatr Pulmonol* 2016; 51: 189-195.
13. Mastouri M, Amaddeo A, Griffon L, *et al.* Weaning from long term continuous positive airway pressure or noninvasive ventilation in children. *Pediatr Pulmonol* 2017; 52: 1349-1354.
14. Ikeda A, Tsuji M, Goto T, *et al.* Long-term home non-invasive positive pressure ventilation in children: Results from a single center in Japan. *Brain Dev* 2018; 40: 558-565.
15. Castro-Codebal ML, Dehaan K, Bedi PK, *et al.* Longitudinal changes in clinical characteristics and outcomes for children using long-term non-invasive ventilation. *PLoS One* 2018; 13: e0192111.
16. Al-Iede M, Kumaran R, Waters K. Home continuous positive airway pressure for cardiopulmonary indications in infants and children. *Sleep Med* 2018; 48: 86-92.

17. Amaddeo A, Frapin A, Touil S, *et al.* Outpatient initiation of long-term continuous positive airway pressure in children. *Pediatr Pulmonol* 2018; 53: 1422-1428.
18. King Z, Josee-Leclerc M, Wales P, *et al.* Can CPAP therapy in pediatric OSA ever be stopped? *J Clin Sleep Med* 2019; 15: 1609-1612.
19. Perriol MP, Jullian-Desayes I, Joyeux-Faure M, *et al.* Long-term adherence to ambulatory initiated continuous positive airway pressure in non-syndromic OSA children. *Sleep Breath* 2019; 23: 575-578.
