# Supplementary material
Source: HighWire-hosted journal article supplement (https://erj.ersjournals.com/content/59/6/2101404)
Supplement: inline-supplementary-material-16 [file inline-supplementary-material-16.pdf]

**Online Table S6.2:** Weaning from CPAP or NIV: optimal timing and requirements for a weaning trial and follow up ?

| Author, year        | Country | Journal               | Type of study | Number of patients                             | Ages       | Timing                                   | Requirements                                                                                                                                                                                                                                                                                                                                                                                                                                                                                                                                                                                                                                                                                                                                                                                                                                                                                                                  | Follow up after weaning                                                                                                   |
|---------------------|---------|-----------------------|---------------|------------------------------------------------|------------|------------------------------------------|-------------------------------------------------------------------------------------------------------------------------------------------------------------------------------------------------------------------------------------------------------------------------------------------------------------------------------------------------------------------------------------------------------------------------------------------------------------------------------------------------------------------------------------------------------------------------------------------------------------------------------------------------------------------------------------------------------------------------------------------------------------------------------------------------------------------------------------------------------------------------------------------------------------------------------|---------------------------------------------------------------------------------------------------------------------------|
| Mastouri et al. [1] | France  | Pediatric Pulmonology | Retrospective | 58/213 (27%) children on long term CPAP or NIV | 0-16.2 yrs | 0.1 - 7.8 m after CPAP or NIV withdrawal | <p>Requirement of all 4 major and at least 2 minor criteria</p> <p>Major criteria</p> <ol style="list-style-type: none"> <li>1) disappearance of nocturnal and daytime symptoms of sleep-disordered breathing after several nights sleeping without CPAP/NIV, such as snoring, sweating, arousals, laboured breathing, change in behaviour or attention,</li> <li>2) percentage of recording time spent with a <math>SpO_2 \leq 90\% &lt; 2\%</math>,</li> <li>3) percentage of recording time spent with a <math>PtcCO_2 \geq 50</math> mmHg <math>&lt; 2\%</math>,</li> <li>4) obstructive apnea-hypopnea index <math>&lt; 10</math> events/h on a poly(somno)graphy</li> </ol> <p>Minor criteria</p> <ol style="list-style-type: none"> <li>1) minimal <math>SpO_2 &gt; 90\%</math></li> <li>2) maximal <math>PtcCO_2 &lt; 50</math> mmHg</li> <li>3) oxygen desaturation index <math>\leq 1.4</math> events/h.</li> </ol> | 7/35 patients with a follow up P(S)G had a relapse of OSA after 1 - 3 yrs<br>6/7 had CPAP resumption and 1/7 neurosurgery |

Abbreviations: m: month, yrs: years, CPAP: continuous positive airway pressure, BPAP: bilevel positive airway pressure, NIV: noninvasive ventilation,  $SpO_2$ : pulse oximetry,  $PtcCO_2$ : transcutaneous carbon dioxide pressure, P(S)G: poly(somno)graphy, OSA: obstructive sleep apnea.

## Reference

1. Mastouri M, Amaddeo A, Griffon L, *et al.* Weaning from long term continuous positive airway pressure or noninvasive ventilation in children. *Pediatr Pulmonol* 2017; 52: 1349-1354.
