# Supplementary material
Source: HighWire-hosted journal article supplement (https://erj.ersjournals.com/content/59/6/2101404)
Supplement: inline-supplementary-material-17 [file inline-supplementary-material-17.pdf]

**Online Table S7:** Which options when CPAP or NIV fails?

| Author                  | Country | Journal         | Type of study           | Number of patients                                                                                  | Ages                                                            | Options                                                                                | Efficacy                                                                                                                                                                                                                                                                                                                                                                                                                                   |
|-------------------------|---------|-----------------|-------------------------|-----------------------------------------------------------------------------------------------------|-----------------------------------------------------------------|----------------------------------------------------------------------------------------|--------------------------------------------------------------------------------------------------------------------------------------------------------------------------------------------------------------------------------------------------------------------------------------------------------------------------------------------------------------------------------------------------------------------------------------------|
| Koontz et al. [1]       | USA     | Sleep           | Retrospective           | 20 children with syndromic OSA not compliant to BPAP                                                | 1-15 yrs                                                        | Behavioral analysis and then given the options of receiving recommendations or therapy | Improvement of compliance (= hours/night usage) in 75% of patients who received behavioral intervention (recommendation or behavioral therapy); benefit extended beyond the therapy period though follow up period not specified.<br>Not clear what the referral criteria was in terms of non-compliance though at baseline, the usage ranged 0.77-3.3 hours/night - the significance of the duration of use may differ across age groups. |
| Slifer et al. [2]       | USA     | Behav Sleep Med | Descriptive case series | 4 children prescribed BPAP for complex OSA or hypoventilation but all demonstrated refusal behavior | 3-5 yrs                                                         | Behavioral therapy                                                                     | Good use of the device (sleep age-appropriate time) with sustained benefit                                                                                                                                                                                                                                                                                                                                                                 |
| Mendoza-Ruiz et al. [3] | France  | Sleep Med       | Prospective study       | 6 CPAP non-adherent (defined as <3 hours/night) children and 9 adherent children                    | 2.2-14.1 yrs (non-adherent group); 0.9-8.6 yrs (adherent group) | Use of a table based on token economy, adherence evaluated after 1 mo                  | Mean adherence in non-adherent children improved from $1 \pm 0.33$ h/night to $4.31 \pm 1.12$ h/night at 1 m, but still significantly lower than adherent children                                                                                                                                                                                                                                                                         |
| Delord                  | France  | Chest           | Retrospective           | 9 children, in                                                                                      | 2-15 yrs                                                        | Hypnosis                                                                               | Acceptance of the NIV in all patients after 1                                                                                                                                                                                                                                                                                                                                                                                              |

|                        |           |                   |                                |                                                                                                         |                         |                                                                                                                                                  |                                                                                                                                                                        |
|------------------------|-----------|-------------------|--------------------------------|---------------------------------------------------------------------------------------------------------|-------------------------|--------------------------------------------------------------------------------------------------------------------------------------------------|------------------------------------------------------------------------------------------------------------------------------------------------------------------------|
| et al. [4]             | e         |                   | ctive study                    | whom initiation of NIV was expected to be difficult or who refused CPAP/NIV by standard procedure (n=2) |                         | Distraction in the 2-yrs old, (In)direct hypnotic suggestions in the other (n=8) older children                                                  | session, median of 3 sessions for a > 6h use/night<br>Mean compliance at 6 m: 7.5h/night                                                                               |
| Cheng et al. [5]       | Australia | ANZ J of Surgery  | Retrospective study 2003-2008  | 20 infants with Pierre Robin Sequence                                                                   | neonates                | CPAP failed (failure to treat respiratory deterioration/distress due to obstruction) in 6 infants: successful management with MDO and glossopexy | MDO with glossopexy were effective for management of multilevel airway obstruction in infants who would otherwise be considered for tracheostomy following failed CPAP |
| Abel et al. [6]        | UK        | Arch Dis Child    | Retrospective cohort 2000-2010 | 104 patients with Pierre Robin Sequence                                                                 | 64/104 < 4 weeks of age | Conservative management in 27 patients, NPT in 63 patients, tracheotomy in 14 patients                                                           | PSG results improved in all patients with NPT<br>No CPAP trial in any patient.                                                                                         |
| Kam et al. [7]         | Canada    | Canadian Respir J | Retrospective cohort           | 139 patients with Pierre Robin Sequence                                                                 | 9 – 14 m                | 20 treated with CPAP, 28 NPT, 45 TLA, 5 MDO, 19 tracheotomy                                                                                      | No details on the protocol but 13/60 surgical patients had another intervention prior to surgery<br>TLA was performed earlier than MDO and tracheotomy                 |
| Muller-Hagedorn et al. | Germany   | Head Face Med     | Retrospective study at         | 68 children with Pierre Robin Sequence                                                                  | 0-12 yrs                | Palatal plate                                                                                                                                    | 5 patients did not tolerate PP, 2 laryngeal problems, 1 immediate tracheotomy<br>Of the 56 patients who tolerated TPP, 1                                               |

|                       |         |                         |                                          |                                                                                     |                |                                                                                                                                                                                                                      |                                                                                                                                                                                                                                                                                  |
|-----------------------|---------|-------------------------|------------------------------------------|-------------------------------------------------------------------------------------|----------------|----------------------------------------------------------------------------------------------------------------------------------------------------------------------------------------------------------------------|----------------------------------------------------------------------------------------------------------------------------------------------------------------------------------------------------------------------------------------------------------------------------------|
| [8]                   |         |                         | 1 center (2003-2009)                     | treated with PP                                                                     |                |                                                                                                                                                                                                                      | needed CPAP and 4 HFNC (with O <sub>2</sub> )                                                                                                                                                                                                                                    |
| Amaddeo et al. [9]    | France  | Plastic and Rec Surgery | Retrospective study 1 center (2014-2015) | 44 children with Pierre Robin Sequence, 9 received CPAP in NICU                     | 0-2 m          | Tracheotomy in 4 out of 9 patients with severe upper airway obstruction and dependent on ventilation in the NICU<br>Failure in CPAP = failure to wean non-invasive CPAP to usage during sleep time only in 1-2 weeks | No objective evaluation of tracheotomy efficacy (not clear if<br>(1) polygraphy post tracheostomy insertion was performed to assess residual obstructive SDB<br>(2) if any patient needed pressure support with tracheostomy in situ<br>(3) no follow up on tracheotomy patients |
| Overbergh et al. [10] | Belgium | Sleep Med               | Case series                              | 9 children with complex OSA and CPAP intolerance                                    | 7 m - 15 yrs   | Optiflow nasal cannula adapted to a life support ventilator                                                                                                                                                          | Median AHI reduction from 37 to 10/h.<br>Drawback of the set up : cannot be used to deliver BPAP because of insufficient trigger                                                                                                                                                 |
| Joseph et al. [11]    | Israel  | J Clin Sleep Med        | Case series                              | 5 children with OSA                                                                 | 2m-15 yrs      | High Flow Nasal Cannula                                                                                                                                                                                              | One child used HFNC at home for 23 mo                                                                                                                                                                                                                                            |
| Amaddeo et al. [12]   | France  | Sleep Med               | Prospective study                        | 8 CPAP non-compliant children, 6 Down syndrome, 1 Pierre Robin Sequence, 1 Pfeiffer | 0.1 - 17.3 yrs | High Flow Nasal Cannula                                                                                                                                                                                              | Success in 5; mean compliance 7h10 ± 0.36 min/night<br>Refusal (failure) in the 3 oldest patients with Down syndrome: 1 orthodontic treatment, 1 spontaneous improvement                                                                                                         |

|                     |     |                                       |                                                                                       |                                                                                       |             |                                                                                                       |                                                                                         |
|---------------------|-----|---------------------------------------|---------------------------------------------------------------------------------------|---------------------------------------------------------------------------------------|-------------|-------------------------------------------------------------------------------------------------------|-----------------------------------------------------------------------------------------|
|                     |     |                                       |                                                                                       | (one of the few studies with a clear definition of failed CPAP /non-adherence)        |             |                                                                                                       |                                                                                         |
| Koncick et al. [13] | USA | Pediatric Pulmonology                 | Retrospective cohort on data from the Pediatric Health Information System (2007-2015) | 3802 children with chronic respiratory failure (OSA excluded) discharged on NIV       | < 21 yrs    | Tracheotomy: 337 (8.9%) were transitioned to tracheotomy 58% had a neurologic disorders and 39% a NMD | Factors associated with a tracheotomy: younger age, anoxia/encephalopathy, quadriplegia |
| Diercks et al. [14] | USA | JAMA Otolaryngology Head Neck Surgery | Case series                                                                           | 6 Down syndrome adolescents not compliant to CPAP after upper airway surgery          | 12 - 18 yrs | Hypoglossal nerve stimulation                                                                         | 56% to 85% reduction in AHI and good use                                                |
| Caloway et al. [15] | USA | Laryngoscope                          | Case series                                                                           | 20 Down syndrome non obese adolescents not compliant to CPAP after adenotonsillectomy | 10 - 21 yrs | Hypoglossal nerve stimulation                                                                         | Median reduction in AHI of 85%, good use                                                |

|  |  |  |  |    |  |  |  |
|--|--|--|--|----|--|--|--|
|  |  |  |  | my |  |  |  |
|--|--|--|--|----|--|--|--|

Abbreviations: m: months, yrs: years, CPAP: continuous positive airway pressure, BPAP: bilevel positive airway pressure, NIV: noninvasive ventilation, NMD: neuromuscular disease, OSA: obstructive sleep apnea, MDO: mandibular distraction osteogenesis, NPT: nasopharyngeal tube, TLA: tongue-lip adhesion, PP: palatal plate, HFNC: high flow nasal cannula, AHI: apnea-hypopnea index, O2: oxygen, NICU: neonatal intensive care unit, BMI: body mass index.

## References

1. Koontz KL, Slifer KJ, Cataldo MD, *et al.* Improving pediatric compliance with positive airway pressure therapy: The impact of behavioral intervention. *Sleep* 2003; 26: 1010-1015.
2. Slifer KJ, Kruglak D, Benore E, *et al.* Behavioral training for increasing preschool children's adherence with positive airway pressure: a preliminary study. *Behav Sleep Med* 2007; 5: 147-175.
3. Mendoza-Ruiz A, Dylgjeri S, Bour F, *et al.* Evaluation of the efficacy of a dedicated table to improve CPAP adherence in children: a pilot study. *Sleep Med* 2019; 53: 60-64.
4. Delord V, Khirani S, Ramirez A, *et al.* Medical hypnosis as a tool to acclimatize children to noninvasive positive pressure ventilation: a pilot study. *Chest* 2013; 144: 87-91.
5. Cheng ATL, Corke M, Loughran-Fowlds A, *et al.* Distraction osteogenesis and glossopexy for Robin sequence with airway obstruction. *ANZ J Surg* 2011; 81: 320-325.
6. Abel F, Bajaj Y, Wyatt M, *et al.* The successful use of the nasopharyngeal airway in Pierre Robin sequence: an 11-year experience. *Arch Dis Child* 2012; 97: 331-334.
7. Kam K, McKay M, MacLean J, *et al.* Surgical versus nonsurgical interventions to relieve upper airway obstruction in children with Pierre Robin sequence. *Can Respir J* 2015; 22: 171-175.
8. Muller-Hagedorn S, Buchenau W, Arand J, *et al.* Treatment of infants with syndromic Robin Sequence with modified palatal plates: a minimally invasive treatment option. *Head Face Med* 2017; 13: 4.

9. Amaddeo A, Abadie V, Chalouhi C, *et al.* Continuous positive airway pressure for upper airway obstruction in infants with Pierre Robin Sequence. *Plast Reconstruct Surg* 2016; 137: 609-612.
10. Overbergh C, Installe S, Boudewyns A, *et al.* The Optiflow™ interface for chronic CPAP use in children. *Sleep Med* 2018; 44: 1-3.
11. Joseph L, Goldberg S, Shitrit M, *et al.* High-Flow Nasal Cannula Therapy for Obstructive Sleep Apnea in Children. *J Clin Sleep Med* 2015; 11: 1007-1010.
12. Amaddeo A, Khirani S, Frapin A, *et al.* High-flow nasal cannula for children not compliant with continuous positive airway pressure. *Sleep Med* 2019; 63: 24-28.
13. Koncicki ML, Zachariah P, Lucas AR, *et al.* A multi-institutional analysis of children on long-term non-invasive respiratory support and their outcomes. *Pediatr Pulmonol* 2018; 53: 498-504.
14. Diercks GR, Wentland C, Keamy D, *et al.* Hypoglossal nerve stimulation in adolescents with Down syndrome and obstructive sleep apnea. *JAMA Otolaryngol Head Neck Surg* 2018; 144: 37-42.
15. Caloway CL, Diercks GR, Keamy D, *et al.* Update on hypoglossal nerve stimulation in children with Down syndrome and obstructive sleep apnea. *Laryngoscope* 2020; 130: E263-E267.
