# Supplementary material
Source: HighWire-hosted journal article supplement (https://erj.ersjournals.com/content/59/6/2101404)
Supplement: inline-supplementary-material-18 [file inline-supplementary-material-18.pdf]

**Online Table S8:** Role of CPAP and NIV in palliative care

| Author, year       | Country  | Journal          | Type of study                                                                                                        | Number of patients                                    | Ages         | Palliative care                                                                                                |
|--------------------|----------|------------------|----------------------------------------------------------------------------------------------------------------------|-------------------------------------------------------|--------------|----------------------------------------------------------------------------------------------------------------|
| Chatwin et al. [1] | UK       | Arch Dis Child   | Retrospective study                                                                                                  | 13 SMA I                                              | 4 – 24 m     | All treated with NIV + MI-E<br>NIV used for palliation of symptoms in 4 patients                               |
| Chong et al. [2]   | Malaysia | Singapore Med J  | Retrospective of children referred to a hospital in Malaysia for palliative care                                     | 137 patients<br>72% malignancies<br>80% died at home  | 2-250 m      | CPAP in 5 children (without details on diseases)                                                               |
| Kherani et al [3]  | Canada   | Pediatr Pulmonol | Retrospective study on all infants < 1 yr treated with long term IV and NIV in Sick Kids (Toronto) between 1991-2014 | 51 infants<br>25 NIV: 14 musculoskeletal,<br>8 deaths | < 1 yr       | 8/25 deaths in the NIV patients, in 4 infants, NIV was used as a palliative treatment                          |
| Tabone et al. [4]  | France   | Am J Med Gen A   | Retrospective study                                                                                                  | 7 children with mucopolipidosis                       | 0.3-17.4 yrs | All patients were treated with CPAP or NIV, one patient had NIV as part of palliative care (2 have died since) |

Abbreviations: m: months, yrs: years, CPAP: continuous positive airway pressure, NIV: noninvasive ventilation, IV: invasive ventilation, SMA: spinal muscular atrophy, MI-E: mechanical insufflation-exsufflation

## References

1. Chatwin M, Bush A, Simonds AK. Outcome of goal-directed non-invasive ventilation and mechanical insufflation/exsufflation in spinal muscular atrophy type I. *Arch Dis Child* 2011; 96: 426-432.
2. Chong LA, Khalid F. Paediatric palliative care at home: a single centre's experience. *Singapore Med J* 2016; 57: 77-80.

3. Kherani T, Sayal A, Al-Saleh S, *et al.* A comparison of invasive and noninvasive ventilation in children less than 1 year of age: A long-term follow-up study. *Pediatr Pulmonol* 2016; 51: 189-195.
4. Tabone L, Caillaud C, Amaddeo A, *et al.* Sleep-disordered breathing in children with mucopolipidosis. *Am J Med Genet A* 2019; 179: 1196-1204.
