# Supplementary material
Source: HighWire-hosted journal article supplement (https://erj.ersjournals.com/content/59/6/2101404)
Supplement: inline-supplementary-material-19 [file inline-supplementary-material-19.pdf]

**Online Table S9.1:** Special populations: CPAP and NIV in infants (< 24 m)

| Author             | Country   | Journal                    | Type of study                                                       | Number of patients                                                                           | Ages                                                     | Sample description/Outcomes                                                                                                                                                                                                                                                                                                                                                                                                                                                                                                   |
|--------------------|-----------|----------------------------|---------------------------------------------------------------------|----------------------------------------------------------------------------------------------|----------------------------------------------------------|-------------------------------------------------------------------------------------------------------------------------------------------------------------------------------------------------------------------------------------------------------------------------------------------------------------------------------------------------------------------------------------------------------------------------------------------------------------------------------------------------------------------------------|
| Adeleye et al. [1] | Canada    | Canadian Respir J          | Retrospective study                                                 | 92 infants <12 m with PSG, 49 were prescribed CPAP                                           | < 12 m                                                   | Of the 92 infants (not only the CPAP treated), 35 Down syndrome, 9 prematurity, 9 Pierre Robin Sequence, 3 PHT, 6 achondroplasia, 2 Prader Willi syndrome, 2 ALTE, 2 genetic disease and 23 others<br>No details (diagnosis) on those treated with CPAP.<br>No data on length of use.                                                                                                                                                                                                                                         |
| Al-Iede et al. [2] | Australia | Sleep Med                  | Retrospective study; data not presented separately for infant group | 148 children treated with nasal CPAP for “non-OSA”, 130 included                             | 18.6±33.6 m (1 wk to 16.8 y)<br>72% < 24 m,<br>26% < 6 m | 65 (50%) primary airway disease [36 laryngomalacia, 17 airway malacia, 5 glottic stenosis, 5 vocal cord paralysis], 33 (25%) chronic lung disease [18 prematurity, 6 oncology, 5 CDH, 4 neonatal ILN], 20 (15%) CHD, 12 (9.2%) CHD + airway.<br>No details on those < 24 m<br>Compliance 116/130 (89%) > 4h/night<br>Mean CPAP 7.3 cmH <sub>2</sub> O<br>Follow up: telephone call, cardiorespiratory monitoring (?) at 2 weeks, CPAP titration PSG after 3-6 m<br>30% stopped CPAP during a 15 m follow up (various reasons) |
| Amaddeo et al. [3] | France    | J Plastic Reconstr Surgery | Retrospective study                                                 | 9 (22%) of 44 neonates with Pierre Robin sequence treated with CPAP in 1 yr at single centre | 0-2 m                                                    | 4 initiation in PICU, 5 on pediatric ward,<br>CPAP level 6-8 cmH <sub>2</sub> O<br>CPAP duration 1-5.5 m<br>No failure, no death, no tracheotomy after CPAP<br>CPAP adherence after 1 m at home >8h/24h<br>Two remained on CPAP at 4 m, 7 ceased CPAP with normal polygraphy or gas exchange between 1-5.5 m                                                                                                                                                                                                                  |
| Bach et al.        | USA       | Pediatr Pulmonol           | Retrospective                                                       | 33 using                                                                                     | 10.9±6.8                                                 | SMA type 1; from birth to 3 <sup>rd</sup> birthday, NIV had more hospitalizations than IV with no difference in hospitalizations                                                                                                                                                                                                                                                                                                                                                                                              |

|                    |        |                                        |                                                              |                                                                                                        |                    |                                                                                                                                                                                                                                                                                                                                                                                                                                                                                                                     |
|--------------------|--------|----------------------------------------|--------------------------------------------------------------|--------------------------------------------------------------------------------------------------------|--------------------|---------------------------------------------------------------------------------------------------------------------------------------------------------------------------------------------------------------------------------------------------------------------------------------------------------------------------------------------------------------------------------------------------------------------------------------------------------------------------------------------------------------------|
| [4]                |        | 1                                      | comparison of SMA1 managed with NIV vs IV vs supportive care | NIV                                                                                                    | m                  | beyond 3 <sup>rd</sup> birthday; 2 died at home; 24 evaluated for gastro-oesophageal reflux, 13 underwent fundoplication                                                                                                                                                                                                                                                                                                                                                                                            |
| Bach et al. [5]    | USA    | Am J Phys Med Rehabil                  | Retrospective cohort, single centre, 1993-2006               | 47 (51%) of 92 with typical, severe SMA type 1                                                         | 10.6±5.7 mo        | SMA type 1; 32 (68%) used BPAP only during sleep, 6 (13%) more than 16h/d, 9 (19%) continuously. 34 (72%) could communicate verbally (cf 22% of IV group). 5 (17%) died at 61±26 m, 45 (96%) underwent gastrostomy, 13 (28%) underwent fundoplication, follow-up to 65±46 m. NIV and tracheostomy can both prolong survival for SMA type 1 patients, but the latter results in continuous ventilator dependence and speech does not develop.                                                                        |
| Bedi et al. [6]    | Canada | Canadian J Respir, Crit Care Sleep Med | Retrospective study                                          | 120 infants using CPAP or BPAP in the province of Alberta over 10 yrs, matched 1:2 with older children | 9.0 m (IQR 12.0 m) | All infants using CPAP or BPAP in the province of Alberta over 10 yrs (55% upper airway, 22% CNS, 15% NMD, 16% cardiorespiratory, 2% other). Average of comorbidities 4 (IQR 3), 51% with 2 or more comorbidities. In comparison with older children (2-17 yrs), infants had more comorbidities, similar efficacy of NIV in improving sleep and respiratory parameters on sleep studies, greater use of BPAP, a higher rate of discontinuation of NIV because of improvement or switch to IV and similar adherence. |
| Chatwin et al. [7] | UK     | Arch Dis Child                         | Retrospective case registry after 1993                       | 13                                                                                                     | 4-24 m             | SMA type 1 & 2 (11 SMA1, 2 borderline SMA type I/II); 5 (38%) died, 2 before 1 yr; tracheotomy discussed but declined in all patients. All NIV was BPAP, S/T mode, nasal mask in 11 (85%)                                                                                                                                                                                                                                                                                                                           |

|                    |        |                    |                                                                              |            |                              |                                                                                                                                                                                                                                                                                                                                                                                                                                                                                                                                                                                                                                                                                                        |
|--------------------|--------|--------------------|------------------------------------------------------------------------------|------------|------------------------------|--------------------------------------------------------------------------------------------------------------------------------------------------------------------------------------------------------------------------------------------------------------------------------------------------------------------------------------------------------------------------------------------------------------------------------------------------------------------------------------------------------------------------------------------------------------------------------------------------------------------------------------------------------------------------------------------------------|
|                    |        |                    |                                                                              |            |                              | <p>12 (92%) required enteral nutrition, none had problems with feeding overnight during NIV.</p> <p>No infant given NIV subsequently developed pectus excavatum.</p> <p>Parents of those who died report more comfortable breathing with NIV, allowed family time at home. One family reported that NIV gave them time at home to come to terms with the diagnosis and prognosis.</p>                                                                                                                                                                                                                                                                                                                  |
| Downey et al. [8]  | USA    | Chest              | Retrospective                                                                | 10         | < 2 yrs;<br>11 were<br><1 yr | <p>OSA diagnosed on PSG who consented to CPAP use; 3 laryngomalacia, 2 post adenotonsillectomy with residual OSA, 1 BPD, 1 Down syndrome, 1 CHD, 1 Pierre Robin Sequence.</p> <p>CPAP 6-9 cmH<sub>2</sub>O, 5 with O<sub>2</sub></p> <p>2 with tracheotomy used CPAP; 1 used CPAP until OSA resolved, 1 used CPAP for 1 yr then elected tracheotomy as long-term treatment.</p> <p>2 with residual OSA post adenotonsillectomy used CPAP until OSA resolved</p> <p>6 used CPAP until OSA resolution; 1-5 y</p> <p>Awakenings, apnea index, obstructive apnea index, hypopnea index, longest apnea, minimal SpO<sub>2</sub>, SaO<sub>2</sub>&lt;90% all improved from baseline PSG on titration PSG</p> |
| Essouri et al. [9] | France | Intensive Care Med | Prospective physiological and clinical study (oesogastric pressure measures) | 10 infants | 9.5 m (3-18 m)               | <p>5 laryngomalacia (1 + Down syndrome), 3 tracheomalacia (1 + T21), 1 tracheal hypoplasia, 1 Pierre Robin Sequence</p> <p>CPAP level 8-12, mean 11 ± 2 cmH<sub>2</sub>O</p> <p>BPAP associated with patient-ventilator asynchrony (trigger not sufficiently sensitive)</p> <p>CPAP resulted in approximately 7% reduction in all indices of respiratory effort. There was no correlation between optimal level of CPAP, age, cause of upper airway obstruction, or oesophageal or transdiaphragmatic pressure swing during spontaneous breathing.</p>                                                                                                                                                 |

|                           |        |            |                                                                  |                                       |                                                                     |                                                                                                                                                                                                                                                                                                                                                                                                                                                                                                                                                                                                                                                                                                                                         |
|---------------------------|--------|------------|------------------------------------------------------------------|---------------------------------------|---------------------------------------------------------------------|-----------------------------------------------------------------------------------------------------------------------------------------------------------------------------------------------------------------------------------------------------------------------------------------------------------------------------------------------------------------------------------------------------------------------------------------------------------------------------------------------------------------------------------------------------------------------------------------------------------------------------------------------------------------------------------------------------------------------------------------|
|                           |        |            |                                                                  |                                       |                                                                     | BPAP improved breathing pattern and respiratory effort similar to that observed with CPAP                                                                                                                                                                                                                                                                                                                                                                                                                                                                                                                                                                                                                                               |
| Gregorette et al. [10]    | Italy  | Pediatrics | Retrospective; 1992-2010; NIV not available until 1999           | 31 infants with SMA type I            | age of first respiratory failure: 12.6±14.4 m (0-42 m to start NIV) | BPAP; 14 (45%) died at median age 28.6 m (mean age 32±21 m, IQR 12.8-41.4 m).<br>NIV used increased from 8% (1999-2004) to 23% (2005-2010).<br>Follow-up 38±21 m.<br>Survival at 24 and 48 m higher in IV than NIV group: 24 m - 95 (95% CI 82-99)% vs 68 (95% CI 47-82)%; 48 m - 89% vs 45%.<br>Hospitalization rate lower in IV vs NIV: 0.023 vs 0.006 episodes/patient/y. Hours/day on ventilation less for NIV vs IV. 7 (22%) eventually tracheostomized.                                                                                                                                                                                                                                                                           |
| Guilleminault et al. [11] | USA    | J Pediatr  | Retrospective study                                              | 74 infants with CPAP at home          | < 12 m                                                              | Reasons for referral: ALTE (23%), failure to thrive (11%), abnormal sleeping patterns with growth retardation (50%) or without growth retardation (16%).<br>57 (77%) had craniofacial anomalies. 45 (60%) were below the 20% for weight and 40% for height.<br>Follow-up period between 5 m to 12 yrs with mean 35±21 m.<br>72 infants successfully treated at home with CPAP, 28 eventually discontinued CPAP, 7 were lost to follow-up, 37 continued CPAP.<br>Complications: major problems were related to mask selection.<br>Treatment failure: 1 infant with Down syndrome, extensive cardiac procedures; 1 infant with Pierre Robin Sequence, BPAP tried for 3 weeks, new cardiorespiratory complications, child died at 6 weeks. |
| Kam et al. [12]           | Canada |            | Retrospective; comparison of surgical and non-surgical treatment | 20 infants with Pierre Robin Sequence | 9±14 m                                                              | CPAP; 14 (70%) isolated, 6 (30%) syndromic.<br>PICU stay 16±23 days (cf tracheotomy 37±34 days), hospital admission 66±46 days (cf tracheotomy 138±76 days).<br>Duration of CPAP use: 6±6 m                                                                                                                                                                                                                                                                                                                                                                                                                                                                                                                                             |

|                         |        |                       |                                                                              |                                                    |                       |                                                                                                                                                                                                                                                                                                                                                                                                                                                                                                                                                                                                |
|-------------------------|--------|-----------------------|------------------------------------------------------------------------------|----------------------------------------------------|-----------------------|------------------------------------------------------------------------------------------------------------------------------------------------------------------------------------------------------------------------------------------------------------------------------------------------------------------------------------------------------------------------------------------------------------------------------------------------------------------------------------------------------------------------------------------------------------------------------------------------|
| Kherani et al. [13]     | Canada | Pediatric Pulmonology | Retrospective study                                                          | 25 children treated with NIV between 1991 and 2013 | 0.6 (IQR 0.4-0.7) yrs | Underlying disease: CNS n=3 (2 CCHS, 1 other central cause), NMD n=14 (3 SMA 1, 2 congenital myopathy, 2 congenital dystrophy, 3 NMD), respiratory disease n=8 (3 CLD, 2 airway malacia, 1 diaphragmatic paresis, 1 pulmonary atresia, 1 OSA). Location of NIV start: 72% PICU, 21% hospital ward, 13% sleep lab.<br>Outcomes: 32% continuing on NIV, 28% improved (no longer require NIV), mortality 32% (age at death 1.1 [IQR 0.9-1.4] y), treatment failure 8%<br>Main complications: mid face hypoplasia 8%, dermatographism 8%                                                           |
| Shatz et al. [14]       | Israel | Otorhinolaryngology   | Retrospective study                                                          | 50 infants with pharyngomalacia                    | 1-18 m                | 9/50 treated with BPAP, 5/50 treated with CPAP, spontaneous weaning from respiratory support before the age of 36 m                                                                                                                                                                                                                                                                                                                                                                                                                                                                            |
| Khirani et al. [15]     | France | Critical Care         | Prospective physiological study (oesogastric pressure measures)              | 12 infants treated with CPAP for OSA               | 2-22 m                | 5 BPD, 1 Pierre Robin Sequence, 1 Prader Willi syndrome, 3 laryngomalacia and 1 laryngomalacia + Down syndrome + 1 OSA                                                                                                                                                                                                                                                                                                                                                                                                                                                                         |
| Leboulanger et al. [16] | France | Pediatrics            | Prospective physiological and clinical study (oesogastric pressure measures) | 7 infants with Pierre Robin Sequence               | 2 m (1-10 m)          | 4 required enteral nutrition.<br>Respiratory effort, assessed by oesogastric pressure measures, decreased significantly during NIV (CPAP, BPAP).<br>Time spent with SpO <sub>2</sub> <90% was reduced (14% to 2%) as was mean and maximal PtcCO <sub>2</sub> values and proportion of time with PtcCO <sub>2</sub> >50 mmHg.<br>Objective compliance was excellent at >8h/day.<br>No tracheotomy or death, 6 of 7 infants weaned from nutritional support. No facial side effects attributable to NIV.<br>CPAP/BPAP duration 16.7±12.2 m (3-39 m)<br>Custom-molded nasal mask for all patients |

|                       |        |                                   |                                                                                                        |                                                        |                                                                                          |                                                                                                                                                                                                                                                                                                                                                                                                                                                                                                                     |
|-----------------------|--------|-----------------------------------|--------------------------------------------------------------------------------------------------------|--------------------------------------------------------|------------------------------------------------------------------------------------------|---------------------------------------------------------------------------------------------------------------------------------------------------------------------------------------------------------------------------------------------------------------------------------------------------------------------------------------------------------------------------------------------------------------------------------------------------------------------------------------------------------------------|
|                       |        |                                   |                                                                                                        |                                                        |                                                                                          | Multidisciplinary hospital/home care approach                                                                                                                                                                                                                                                                                                                                                                                                                                                                       |
| Lemoine et al. [17]   | USA    | Pediatr Crit Care Med             | Retrospective, intention to treat, Jan 2002 to May 2009, Proactive respiratory care vs supportive care | 23 with SMA type I (3 with tracheotomy so 20 with NIV) | Age at diagnosis : 136 (IQR 54-196) d; days after diagnosis to BPAP: 44 (IQR 22-93) days | BPAP; proactive respiratory care (including NIV and tracheotomy), as opposed to supportive care, was associated with fewer days to first episode of respiratory insufficiency, similar frequency of acute life threatening events, higher rates of in-patient care for respiratory insufficiency, longer survival.<br>Adherence to treatment protocols was associated with a trend for longer adjusted survival.                                                                                                    |
| Leonardis et al. [18] | USA    | JAMA Otolaryngo Head Neck Surgery | 126 infants with OSA on PSG                                                                            | 18/126 treated with CPAP/BPAP                          | 16 mos                                                                                   | No details on those treated with CPAP/BPAP<br>46/(129) 126 had congenital malformation or craniofacial syndrome (10 Down syndrome, 9 cleft palate, 6 Pierre Robin Sequence, 6 achondroplasia) and 36 laryngomalacia<br>For those with pre and post-intervention PSG, CPAP showed the highest mean percentage decrease in AHI (67.2% decrease) followed by tracheotomy (67.0%), observation (65.6%), and supraglottoplasty (65.3%).<br>CPAP proved to be the most objectively efficacious intervention.              |
| Markstrom et al. [19] | Sweden | Acta Pediatr                      | Retrospective study                                                                                    | 18 infants treated with NIV                            | 4 m (1-12 m)                                                                             | Reason for initiation of NIV: hypoventilation in 12 and reduced cough/recurrent infections in 6 infants.<br>Diagnoses: 7 intermediate SMA, 3 CCHS, 2 diaphragmatic paralysis, 2 Down syndrome, 1 centronuclear myopathy, 1 nemaline myopathy, 1 Leigh syndrome, 1 myelomeningocele.<br>Initiation of NIV resulted in significant improvements in PtcCO <sub>2</sub> and PtcO <sub>2</sub> .<br>Location of initiation: PICU 44%, ward with special training in NIV 28%, electively on ordinary children's ward 28%. |

|                             |               |                                  |                                                               |                                                                                                                                      |                                                                                                             |                                                                                                                                                                                                                                                                                                                                                                                                                                                                                                                                          |
|-----------------------------|---------------|----------------------------------|---------------------------------------------------------------|--------------------------------------------------------------------------------------------------------------------------------------|-------------------------------------------------------------------------------------------------------------|------------------------------------------------------------------------------------------------------------------------------------------------------------------------------------------------------------------------------------------------------------------------------------------------------------------------------------------------------------------------------------------------------------------------------------------------------------------------------------------------------------------------------------------|
|                             |               |                                  |                                                               |                                                                                                                                      |                                                                                                             | <p>Duration of NIV: 3 (17%) CCHS on nocturnal only, 2 (11%) diaphragmatic paralysis discontinued because of improvement, 7 (38%) still on NIV, 4 (22%) discontinued because of improvement, 2 (11%) tracheotomy, 1 (5%) died.</p> <p>Asynchrony associated only with leakage from the mask.</p> <p>Mid face hypoplasia of varying degree in CCHS and diaphragm paralysis; custom-made full face mask in 1 CCHS</p>                                                                                                                       |
| McNamar<br>a et al.<br>[20] | Austr<br>alia | Chest                            | Retrospecti<br>ve study                                       | 8 infants<br>with OSA<br>treated with<br>CPAP<br>[compared<br>to 8 control<br>infants and<br>8 with OSA<br>not treated<br>with CPAP] | At<br>diagnosis<br>10.8±1.3<br>weeks<br>(6-18<br>weeks);<br>At CPAP<br>sleep<br>study:<br>11.4±1.3<br>weeks | <p>Referred for OSA investigation because of ALTE or family history. CPAP resulted in prevention of nearly all obstructive events during sleep with a significant reduction in central apnea.</p> <p>Each infant tolerated CPAP mask and CPAP well.</p> <p>Parents reported their infants sleeping well at home with the use of CPAP.</p> <p>Treatment with CPAP resulted in significant increase in the spontaneous arousals during rapid eye movement sleep which was similar to the spontaneous arousal index in control infants.</p> |
| Pelen et<br>al. [21]        | Austr<br>alia | Int J Ped<br>Otorhino<br>laryngo | Retrospecti<br>ve study                                       | 19 infants<br>with<br>congenital<br>tracheal<br>stenosis                                                                             | 0 - 9 m                                                                                                     | <p>All treated with NIV pre and post-operative, age at start 0 – 6 m, duration NIV 1 – 24 m,</p> <p>2 (20%) patients discharged home on NIV</p>                                                                                                                                                                                                                                                                                                                                                                                          |
| Robison<br>et al. [22]      | USA           | Laryngos<br>cope                 | Retrospecti<br>ve study,<br>treatment of<br>OSA in<br>infants | 18 (6%) of<br>295 treated<br>with CPAP<br>or BPAP                                                                                    | 15.6 m<br>(3-29 m)                                                                                          | <p>No data on medical comorbidities in those on NIV</p> <p>Mean age at CPAP/BPAP initiation 3 –29 m</p> <p>No information on diagnosis, settings, follow up</p> <p>Subjective intervention efficacy (-1 to 3) based on subjective parental response.</p> <p>Objective efficacy based on reduction in AHI: 84% (on tracheotomy 93%, supplemental O<sub>2</sub> 60%, adenotonsillectomy 56%, observation 54%, adenoidectomy alone 18%, tonsillectomy alone increase of</p>                                                                 |

|                         |          |                             |                                                                                       |                                 |                     |                                                                                                                                           |
|-------------------------|----------|-----------------------------|---------------------------------------------------------------------------------------|---------------------------------|---------------------|-------------------------------------------------------------------------------------------------------------------------------------------|
|                         |          |                             |                                                                                       |                                 |                     | 5%).                                                                                                                                      |
| Rosen et al. [23]       | USA      | Clin Pediatr                | Retrospective study, Down syndrome < 2 yrs, referred to sleep lab, Jan 2004-June 2009 | 6 (21%) of 29 treated with CPAP | < 2 yrs             | 3 (50%) of 6 infants treated with CPAP found at 5, 5, and 10 m to have no further evidence of OSA                                         |
| Vasconcelos et al. [24] | Portugal | Retrospective study, 11 yrs |                                                                                       | 7                               | 13 m (3 m to 3 yrs) | SMA type 1 on BPAP<br>Duration: 29 m (16 m-3.5y)<br>Deaths: 5 (71%), age 4 m (1 m-15 m)<br>[At least one started NIV outside of infancy ] |

Abbreviations: m: months, yrs: years, OSA: obstructive sleep apnea, BPAP: bilevel positive airway pressure, NIV: noninvasive ventilation, IV: invasive ventilation, SMA: spinal muscular atrophy, NMD: neuromuscular disease, BPD: bronchopulmonary dysplasia, ALTE: acute life-threatening event, SIDS: sudden infant death syndrome, CDH: congenital diaphragmatic hernia, CHD: congenital heart disease, CLD: chronic lung disease, ILD: interstitial lung disease, CNS: central nervous system, CCHS: congenital central hypoventilation syndrome, BPD: bronchopulmonary dysplasia, PHT: pulmonary hypertension, AT: adenotonsillectomy, PSG: polysomnography, PICU: pediatric intensive care unit, O2: oxygen, SpO<sub>2</sub>: pulse oximetry, PtcO<sub>2</sub>: transcutaneous oxygen pressure, PtcCO<sub>2</sub>: transcutaneous carbon dioxide pressure.

## References

1. Adeleye A, Ho A, Nettel-Aguirre A, *et al.* Noninvasive positive airway pressure treatment in children less than 12 months of age. *Can Respir J* 2016; 2016: 7654631.
2. Al-Iede M, Kumaran R, Waters K. Home continuous positive airway pressure for cardiopulmonary indications in infants and children. *Sleep Med* 2018; 48: 86-92.



3. Amaddeo A, Abadie V, Chalouhi C, *et al.* Continuous positive airway pressure for upper airway obstruction in infants with Pierre Robin Sequence. *Plast Reconstruct Surg* 2016; 137: 609-612.
4. Bach JR, Baird JS, Plosky D, *et al.* Spinal muscular atrophy type 1: management and outcomes. *Pediatr Pulmonol* 2002; 34: 16-22.
5. Bach JR, Saltstein K, Sinquee D, *et al.* Long-term survival in Werdnig-Hoffmann disease. *Am J Phys Med Rehabil* 2007; 86: 339-345.
6. Bedi PK, Castro-Codecal ML, Featherstone R, *et al.* Long-term non-Invasive ventilation in infants: A systematic review and meta-analysis. *Front Pediatr* 2018; 6: 13.
7. Chatwin M, Bush A, Simonds AK. Outcome of goal-directed non-invasive ventilation and mechanical insufflation/exsufflation in spinal muscular atrophy type I. *Arch Dis Child* 2011; 96: 426-432.
8. Downey R, 3rd, Perkin RM, MacQuarrie J. Nasal continuous positive airway pressure use in children with obstructive sleep apnea younger than 2 years of age. *Chest* 2000; 117: 1608-1612.
9. Essouri S, Nicot F, Clement A, *et al.* Noninvasive positive pressure ventilation in infants with upper airway obstruction: comparison of continuous and bilevel positive pressure. *Intensive Care Med* 2005; 31: 574-580.
10. Gregoretti C, Ottonello G, Chiarini Testa MB, *et al.* Survival of patients with spinal muscular atrophy type 1. *Pediatrics* 2013; 131: e1509-e1514.
11. Guilleminault C, Pelayo R, Clerk A, *et al.* Home nasal continuous positive airway pressure in infants with sleep-disordered breathing. *J Pediatr* 1995; 127: 905-912.
12. Kam K, McKay M, MacLean J, *et al.* Surgical versus nonsurgical interventions to relieve upper airway obstruction in children with Pierre Robin sequence. *Can Respir J* 2015; 22: 171-175.
13. Kherani T, Sayal A, Al-Saleh S, *et al.* A comparison of invasive and noninvasive ventilation in children less than 1 year of age: A long-term follow-up study. *Pediatr Pulmonol* 2016; 51: 189-195.
14. Shatz A, Goldberg S, Picard E, *et al.* Pharyngeal wall collapse and multiple synchronous airway lesions. . *Ann Otol Rhinol Laryngol* 2004; 113: 483-487.
15. Khirani S, Ramirez A, Aloui S, *et al.* Continuous positive airway pressure titration in infants with severe upper airway obstruction or bronchopulmonary dysplasia. *Crit Care* 2013; 17: R167.
16. Leboulanger N, Picard A, Soupre V, *et al.* Physiologic and clinical benefits of noninvasive ventilation in infants with Pierre Robin sequence. *Pediatrics* 2010; 126: e1056-1063.
17. Lemoine TJ, Swoboda KJ, Bratton SL, *et al.* Spinal muscular atrophy type 1: are proactive respiratory interventions associated with longer survival? *Pediatr Crit Care Med* 2012; 13: e161-165.
18. Leonardis RL, Robison JG, Otteson TD. Evaluating the management of obstructive sleep apnea in neonates and infants. *JAMA Otolaryngol Head Neck Surg* 2013; 139: 139-146.
19. Markstrom A, Sundell K, Stenberg N, *et al.* Long-term non-invasive positive airway pressure ventilation in infants. *Acta Paediatr* 2008; 97: 1658-1662.

20. McNamara F, Sullivan CE. Obstructive sleep apnea in infants and its management with nasal continuous positive airway pressure. *Chest* 1999; 116: 10-16.
21. Pellen G, Pandit C, Castro C, *et al.* Use of non-invasive ventilation in children with congenital tracheal stenosis. *Int J Pediatr Otorhinolaryngol* 2019; 127: 109672.
22. Robison JG, Wilson C, Otteson TD, *et al.* Analysis of outcomes in treatment of obstructive sleep apnea in infants. *Laryngoscope* 2013; 123: 2306-2314.
23. Rosen D. Some infants with Down syndrome spontaneously outgrow their obstructive sleep apnea. *Clin Pediatr* 2010; 49: 1068-1071.
24. Vasconcelos M, Fineza I, Felix M, *et al.* Spinal muscular atrophy--noninvasive ventilatory support in pediatrics. *Rev Port Pneumol* 2005; 11: 443-455.
