# Supplementary material
Source: HighWire-hosted journal article supplement (https://erj.ersjournals.com/content/59/6/2101404)
Supplement: inline-supplementary-material-20 [file inline-supplementary-material-20.pdf]

**Online Table S9.2:** Special population: obese children

| Author           | Country   | Journal                            | Study design         | Number of patients                                                  | Ages           | BMI                                         | Evaluation                                                                                                                                                                                                                           | Conclusion                                                                                                                                                                                                                                                                                                                                                     |
|------------------|-----------|------------------------------------|----------------------|---------------------------------------------------------------------|----------------|---------------------------------------------|--------------------------------------------------------------------------------------------------------------------------------------------------------------------------------------------------------------------------------------|----------------------------------------------------------------------------------------------------------------------------------------------------------------------------------------------------------------------------------------------------------------------------------------------------------------------------------------------------------------|
| Shine et al. [1] | Australia | Arch Otolaryngol Head Neck Surgery | Retrospective cohort | 19 obese (BMI >95 <sup>th</sup> centile) children                   | 2 - 18 yrs     | Median BMI z-score (SD): 2.84 (0.94)        | 10 children needed CPAP after AT                                                                                                                                                                                                     | AT improves sleep respiratory parameters in morbidly obese children with OSA but most patients have residual OSA requiring further treatment.                                                                                                                                                                                                                  |
| Beebe et al. [2] | USA       | Plos One                           | Prospective study    | 13 obese patients treated with CPAP + 15 obese controls without OSA | 14.8 ± 1.8 yrs | 42.4 ± 6.1                                  | Neurobehavioral evaluation (parent and self report questionnaire), academic grades and attention test done at baseline and > 4 m after CPAP initiation<br>Adherence defined by a use > 21% of sleep time: 6 were adherent, 7 not     | Improved attention and academic performance in the adherent patients<br>Limitations: data not presented separately for those with obesity, no comparison of obese vs non-obese subjects.                                                                                                                                                                       |
| Puri et al. [3]  | USA       | J Clin Sleep Med                   | Retrospective study  | 37 obese children treated with CPAP                                 | 1.6 – 18 yrs   | BMI z-score 1.8±1.4 [full group], 65% obese | Overall group: mean use was 3.4 ± 2.7 h/night at 1 week, 2.8 ± 2.3 h/night at 1 m, 2.7 ± 2.4 h/night at 3 m<br>Greater adherence when younger age, higher maternal education, household member using CPAP, and greater use at 1 week | Overall CPAP adherence was low<br>Having a family member with OSA on CPAP therapy was associated with better adherence in the child.<br>The cohort has a number of comorbidities (asthma, neurological condition, craniofacial conditions) that can affect CPAP adherence, and that is not specific for obese population.<br>Limitation: data not presented or |

|                           |        |                  |                                         |                                               |                         |                                 |                                                                                                                                                |                                                                                                                                                                                                                                                                                    |
|---------------------------|--------|------------------|-----------------------------------------|-----------------------------------------------|-------------------------|---------------------------------|------------------------------------------------------------------------------------------------------------------------------------------------|------------------------------------------------------------------------------------------------------------------------------------------------------------------------------------------------------------------------------------------------------------------------------------|
|                           |        |                  |                                         |                                               |                         |                                 |                                                                                                                                                | analyzed separately for subjects with obesity.                                                                                                                                                                                                                                     |
| Katz et al. [4]           | Canada | J Clin Sleep Med | Prospective multicenter                 | 27                                            | 6-18 yrs                | BMI z-score: mean 2.6 (2.3-2.8) | Evaluation of insuline resistance, 24h-BP, h-CRP at baseline and 6 and 12 m<br>14 CPAP, 13 BPAP<br>14 adherent (> 6h use/night)                | CPAP/BPAP no effect on insulin resistance, 24h-BP, hs-CRP at 6 and 12 m<br>However there were[3] clinically relevant improvements in insulin resistance and systolic BP load.                                                                                                      |
| Alonso-Alvarez et al. [5] | Spain  | Sleep Med        | Cross sectional prospective multicenter | 113 but only 6 treated with CPAP              | 11.3 ± 2.9 yrs          | BMI z-scores: 1.34 ± 0.59       | Only 6/113 children treated with CPAP for 1 yr                                                                                                 | Significant univariate associations between BMI and CRP, insulin, and homeostasis model assessment of insulin resistance present at baseline and after 1 yr after CPAP initiation. With CPAP (n=6): decrease in glucose, CRP, cholesterol, LDL/HDL<br>No information on compliance |
| Sudaram et al. [6]        | USA    | J Pediatrics     | Prospective                             | 9                                             | 11.5 ± 1.2 yrs          | BMI z-score 2.2 ± 0.3           | CPAP duration 89 ± 62 days<br>Adherence 73 ± 24% of nights<br>Mean use 296 ± 126 min/night                                                     | Improvement of biomarkers of non-alcoholic fatty liver disease, liver enzymes, oxidative stress and metabolic syndrome<br>Of note: low baseline AHI : mean 7, max 11/h                                                                                                             |
| Amini et al. [7]          | USA    | Children         | Retrospective, single centre            | 18 (BMI≥85 %, AHI >1, treated with CPAP/BPAP) | 11.8±3.4 y (full group) | BMI z-score 2.6±0.5             | 17 CPAP, 1 BPAP; 2 CPAP + 1 BPAP titrated in the lab, remainder (14) treated with auto-CPAP. Mean follow-up 19 m (median 12.5 m, range 3-46 m) | Decrease in total cholesterol, LDL cholesterol in CPAP/BPAP group<br>No change in HDL cholesterol, triglycerides, fasting glucose, or BMI in either subgroup.                                                                                                                      |
| Baldi et al. [8]          | India  | Indian J Pediatr | Simulation cohort,                      | Not applicable                                | 1-18 yrs                | Not applicabl                   | Simulation of adverse outcomes of obesity in                                                                                                   | Costs for adverse outcomes related to OSA (stroke, CHD, type 2 DM in                                                                                                                                                                                                               |

|                     |        |               |                                                                |                                                             |                |   |                                                                                                                                        |                                                                                                                                                                                                                                                                                                                                                      |
|---------------------|--------|---------------|----------------------------------------------------------------|-------------------------------------------------------------|----------------|---|----------------------------------------------------------------------------------------------------------------------------------------|------------------------------------------------------------------------------------------------------------------------------------------------------------------------------------------------------------------------------------------------------------------------------------------------------------------------------------------------------|
|                     |        |               | based on 2011 Indian census                                    |                                                             |                | e | OSA children                                                                                                                           | adulthood) in patients only treated with AT are higher compared to those treated with both AT and CPAP; even if CPAP results are more expensive than AT, the two treatment together promote a greater reduction of obese subjects and a subsequent higher reduction in adverse outcomes resulting in an overall cost reduction compared to AT alone. |
| Carriere et al. [9] | France | Acta Paediatr | Retrospective cohort, single centre, received care for obesity | 128 children referred for overweight or obesity, 10 on CPAP | 12.1 ± 3.2 yrs |   | Healthcare management offered; diagnostic and therapeutic impact of sleep consultation<br>Time to set-up CPAP 1-9 m after consultation | PSG identified OSA in 24.2% of overall population. CPAP suggested for 17, prescribed for 10 and finally used by 8 (6.2% of the study population, 10% of those undergoing PSG).                                                                                                                                                                       |

Abbreviations: m: months, yrs: years, CPAP: continuous positive airway pressure, BPAP: bilevel positive airway pressure, NIV: noninvasive ventilation, OSA: obstructive sleep apnea, BMI: body mass index, AT: adenotonsillectomy, PSG: polysomnography, AHI: apnea-hypopnea index, DM: diabetes mellitus, BP: blood pressure, hs-CRP: high sensitivity C-Reactive Protein, LDL: low density lipoprotein, HDL: high density lipoprotein.

## References

1. Shine NP, Lannigan FJ, Coates HL, *et al.* Adenotonsillectomy for obstructive sleep apnea in obese children: effects on respiratory parameters and clinical outcome. *Arch Otolaryngol Head Neck Surg* 2006; 132: 1123-1127.

2. Beebe DW, Byars KC. Adolescents with obstructive sleep apnea adhere poorly to positive airway pressure (PAP), but PAP users show improved attention and school performance. *PLoS One* 2011; 6: e16924.
3. Puri P, Ross KR, Mehra R, *et al.* Pediatric positive airway pressure adherence in obstructive sleep apnea enhanced by family member positive airway pressure usage. *J Clin Sleep Med* 2016; 12: 959-963.
4. Katz SL, MacLean JE, Hoey L, *et al.* Insulin resistance and hypertension in obese youth with sleep-disordered breathing treated with positive airway pressure: A prospective multicenter study. *J Clin Sleep Med* 2017; 13: 1039-1047.
5. Alonso-Álvarez ML, Terán-Santos J, Gonzalez Martinez M, *et al.* Metabolic biomarkers in community obese children: effect of obstructive sleep apnea and its treatment. *Sleep Med* 2017; 37: 1-9.
6. Sundaram SS, Halbower AC, Klawitter J, *et al.* Treating obstructive sleep apnea and chronic intermittent hypoxia improves the severity of nonalcoholic fatty liver disease in children. *J Pediatr* 2018; 198: 67-75.e61.
7. Amini Z, Kotagal S, Lohse C, *et al.* Effect of obstructive sleep apnea treatment on lipids in obese children. *Children (Basel)* 2017; 4: 44.
8. Baldi I, Gulati A, Lorenzoni G, *et al.* Public health implications of obstructive sleep apnea burden. *Indian J Pediatr* 2014; 81 Suppl 1: 55-62.
9. Carriere C, Coste O, Meiffred-Drouet MC, *et al.* Sleep disorders in obese children are not limited to obstructive sleep apnoea syndrome. *Acta Paediatrica* 2018; 107: 658-665.
