# Supplementary material
Source: HighWire-hosted journal article supplement (https://erj.ersjournals.com/content/59/6/2101404)
Supplement: inline-supplementary-material-22 [file inline-supplementary-material-22.pdf]

**Online Table S10:** CPAP and NIV and quality of life for patients and families / caregivers

| Author, year        | Country | Journal          | Type of study                                     | Number of patients                                                                                                                                                                                            | Ages                                          | QoL (family, child)                                                                                                                                                                                                                                                                                                            |
|---------------------|---------|------------------|---------------------------------------------------|---------------------------------------------------------------------------------------------------------------------------------------------------------------------------------------------------------------|-----------------------------------------------|--------------------------------------------------------------------------------------------------------------------------------------------------------------------------------------------------------------------------------------------------------------------------------------------------------------------------------|
| Nozoe et al. [1]    | Brazil  | Sleep & Breath   | PSQI administered to mothers of Duchenne patients | 32 caregiver mothers and 32 control mothers: 16 patients treated with NIV                                                                                                                                     |                                               | Of the 16 NIV patients: 8 mothers had good sleep quality and 8 bad<br>The longer the NIV use (months), the better mother sleep quality (=only sleep quality predictor)                                                                                                                                                         |
| Gonzalez et al. [2] | Spain   | Eur J Pediatr    | Cross-sectional study, interview (PedQoL)         | 41 patients (invasive and NIV) with 20 children treated with NIV                                                                                                                                              | Median age of NIV patients: 10.1 yrs (7.1-13) | Lower QoL in patients and parents (compared to healthy children and their parents)<br>Parents perceived lower QoL than the patients<br>Importance of underlying disease (> 50% NMD)<br>QoL scores were low in all age groups, mainly physical domain, scores are lower in children treated with NIV                            |
| Cadart et al. [3]   | France  | Acta Pediatr     | Prospective                                       | 96 parents of 86 children with rare conditions and referred to a sleep lab for a P(S)G filled in questionnaires on anxiety, depression, family functioning, parents QoL, daytime sleepiness and sleep quality | 0.3 - 18 yrs                                  | 27/86 children were treated with CPAP or NIV<br>19% of the parents of children on NIV/CPAP presented with moderate-to-severe anxiety; 8% presented with moderate-to-severe depression.<br>The responses to all the questionnaires did not differ between parents of children treated or not treated with long term CPAP or NIV |
| Lynch et al. [4]    | USA     | Behavioral Sleep | OSA-specific QoL                                  | 42 youth-caregiver dyads: data from 25 youth-caregiver                                                                                                                                                        | 8-16 yrs (exclusion 1. cognitive &            | CPAP-adherent youth had decreased sleep disturbance + decreased caregiver concern                                                                                                                                                                                                                                              |

|                     |        |                  |                                                                                                            |                                                                                                      |                                                                                                    |                                                                                                                                                                                                                                                                                                  |
|---------------------|--------|------------------|------------------------------------------------------------------------------------------------------------|------------------------------------------------------------------------------------------------------|----------------------------------------------------------------------------------------------------|--------------------------------------------------------------------------------------------------------------------------------------------------------------------------------------------------------------------------------------------------------------------------------------------------|
|                     |        | Med              | questionnaire given before and after 3 m of CPAP                                                           | dyads suitable for analysis                                                                          | physical disabilities; 2. comorbid medical and neurological conditions; 3. on anti-psychotic drugs | No significantly different changes in overall QoL between CPAP adherent and non-adherent youths before CPAP and 3 m after initiation.                                                                                                                                                            |
| Redouane et al. [5] | Canada | Plos One         | Single centre cross-sectional study on QoL of parents of children using G, IV or NIV, or both              | 39 using NIV, 8 using IV, 20 using G + NIV, and 8 G + IV                                             | 5-18 yrs                                                                                           | Parental perception of QoL was lower than those of parents with healthy children.<br>QoL perception was lower in parents of children using G than IV/NIV; technologies do not have additive effect on QoL.<br>No difference between children using IV or NIV: importance of underlying condition |
| Meltzer et al. [6]  | USA    | J Clin Sleep Med | Cross sectional prospective study comparing sleep patterns and Health related QoL of parents of ventilated | 42 families with ventilated children (30 IV and 12 NIV children) and 40 families of healthy children | 4-17 yrs                                                                                           | Parents of children treated with IV or NIV showed significantly later bedtimes, shorter total sleep time, lower sleep efficiency.<br>Many showed significant instability of their sleep, directly related to health related QoL.                                                                 |

|                        |           |                         |                                                                                                |                                                                                                                            |                                                                      |                                                                                                                                                                                                                                                                                                                                                                                  |
|------------------------|-----------|-------------------------|------------------------------------------------------------------------------------------------|----------------------------------------------------------------------------------------------------------------------------|----------------------------------------------------------------------|----------------------------------------------------------------------------------------------------------------------------------------------------------------------------------------------------------------------------------------------------------------------------------------------------------------------------------------------------------------------------------|
|                        |           |                         | and healthy children                                                                           |                                                                                                                            |                                                                      |                                                                                                                                                                                                                                                                                                                                                                                  |
| Young et al. [7]       | Australia | Neurology               | Retrospective review of effect of NIV on clinical and QoL in children with severe NMD          | 14 children (SMA II, congenital myopathy, merosine deficient myopathy, myotonic dystrophy and Duchenne muscular dystrophy) | Median age 7.7 yrs (1.5-16 years)                                    | Comparison before and after NIV initiation. Symptoms of daytime sleepiness (p=0.003) and headaches (p= 0.046) improved after initiation of NIV<br>Sleep quality improved.<br>QoL remained stable after NIV despite disease progression                                                                                                                                           |
| Johannsen et al. [8]   | Germany   | Health and QoL outcomes | Questionnaire survey in 43 families of children with NMD                                       | 43 families returned questionnaire: 18 with ventilated children 25 non-ventilated children                                 | Age of IV/NIV initiation 4.4 yrs $\pm$ 5.4                           | Compared to normative data, children with NMD and their families had a lower health-related-QoL and mental health. No additional negative influence on the overall health related QoL of ventilator use. IV/NIV per se is not responsible for the reduction of health related QoL and mental health                                                                              |
| Baiardini I et al. [9] | Italy     | J Child Neurol          | Cross-sectional study using questionnaires (Child health questionnaire –parent form 30, Family | 27 DMD children and their parents                                                                                          | Mean age of children 11.2 yrs<br>Mean age of parents mean age 40 yrs | Out of 27 children, 4 were ventilator users. Children reported significantly lower scores than normative group in 10/15 children health questionnaire dimensions. Only the use of wheelchairs (p=0.02) and ventilators (p<0.001) was significantly associated to lower health related QoL. Family strain questionnaire scores were not influenced by children's characteristics. |

|                         |        |                     |                                                                                                                |                                                                                                                                                                                                                                                 |                                                                                                                       |                                                                                                                                                                                                                                                                                                                                                                                                                                                                                                                                                         |
|-------------------------|--------|---------------------|----------------------------------------------------------------------------------------------------------------|-------------------------------------------------------------------------------------------------------------------------------------------------------------------------------------------------------------------------------------------------|-----------------------------------------------------------------------------------------------------------------------|---------------------------------------------------------------------------------------------------------------------------------------------------------------------------------------------------------------------------------------------------------------------------------------------------------------------------------------------------------------------------------------------------------------------------------------------------------------------------------------------------------------------------------------------------------|
|                         |        |                     | strain questionnaire                                                                                           |                                                                                                                                                                                                                                                 |                                                                                                                       |                                                                                                                                                                                                                                                                                                                                                                                                                                                                                                                                                         |
| Noyes J et al. [10]     | UK     | J Advanced Nursing  | Cross sectional study using validated questionnaires                                                           | Comparison of ventilator dependent children reports of health related QoL with parents report and normative population<br>27 ventilated children (17 responded to questionnaires)<br>27 parents of ventilated children (15/27 on nocturnal NIV) | Age of children 4-18 yrs<br>The underlying diagnosis were only classified into congenital/spinal injury/brain injury. | Ventilated patients report significantly lower overall health related QoL and significantly lower scores in all domains except about their friends, compared with healthy children and children with other chronic diseases.<br>Parents reported significantly lower scores for their child's disease and relationships with friends.<br>Positive correlation between children and parents in all areas apart from self-esteem and school.<br>Parents are not necessarily accurate proxies for all aspects of their child's experience and perceptions. |
| Vuillerot C et al. [11] | France | J Adolescent Health | Cross sectional study using questionnaire to assess self perceived QoL correlating with impairment, disability | 43 adolescents with NMD including DMD, SMA, congenital myopathy; congenital muscular dystrophy and fascioscapulo-humeral muscular dystrophy                                                                                                     | mean age $13.8 \pm 1.7$ yrs                                                                                           | VSP-A (self-perceived health state in adolescents) assess perceived wellbeing in 10 domains.<br>VSP-A scores in physically disabled adolescents were similar to those of non-disabled group with regard to vitality, body image, relationships with parents and friends, physical and psychological wellbeing.<br>Adolescents with ventilatory support did not express lower scores than adolescents not requiring ventilatory support (p=0.39)                                                                                                         |

|                              |        |                |                                                                                                                                                           |                                                                                                                                                                                                                                                          |                      |                                                                                                                                                                                                                                                                                                                                                                                                                                                                                                                                                        |
|------------------------------|--------|----------------|-----------------------------------------------------------------------------------------------------------------------------------------------------------|----------------------------------------------------------------------------------------------------------------------------------------------------------------------------------------------------------------------------------------------------------|----------------------|--------------------------------------------------------------------------------------------------------------------------------------------------------------------------------------------------------------------------------------------------------------------------------------------------------------------------------------------------------------------------------------------------------------------------------------------------------------------------------------------------------------------------------------------------------|
|                              |        |                | and<br>respiratory<br>status                                                                                                                              |                                                                                                                                                                                                                                                          |                      |                                                                                                                                                                                                                                                                                                                                                                                                                                                                                                                                                        |
| Carneval<br>e et al.<br>[12] | Canada | Pediatr<br>ics | A<br>qualitative<br>study<br>using<br>semistruct<br>ured<br>interview<br>of 12<br>families<br>with<br>children<br>on<br>ventilatory<br>support at<br>home | 12 families with<br>children having:<br>abnormal ventilatory<br>control; NMD; spina<br>bifida; craniofacial<br>or airway<br>abnormalities (4<br>tracheostomy<br>invasive ventilation;<br>8 NIV)<br>Fieldwork<br>observations were<br>carried out at home | Age not<br>specified | 6 principal themes were identified:<br><ol style="list-style-type: none"> <li>1. Confronting parental responsibilities – stressful for parents</li> <li>2. Families seeking normality</li> <li>3. Conflicting social values – parents feeling child's life devalued</li> <li>4. Living in isolation</li> <li>5. Voice of child often not heard</li> <li>6. Questioning of moral order</li> </ol> Despite difficulties described by families, they also reported deep enrichments and rewarding experiences that they could not imagine living without. |

Abbreviations: m: months, yrs: years, QoL: quality of life, CPAP: continuous positive airway pressure, BPAP: bilevel positive airway pressure, NIV: noninvasive ventilation, IV: invasive ventilation, G: gastrostomy, PSQI: Pittsburgh Sleep Quality Index, PedQoL: Pediatric Quality of Life, NMD: neuromuscular disease, SMA: spinal muscular dystrophy, OSA: obstructive sleep apnea, P(S)G: poly(somno)graphy.

## References

1. Nozoe KT, Polesel DN, Moreira GA, *et al.* Sleep quality of mother-caregivers of Duchenne muscular dystrophy patients. *Sleep Breath* 2016; 20: 129-134.
2. Gonzalez R, Bustinza A, Fernandez SN, *et al.* Quality of life in home-ventilated children and their families. *Eur J Pediatr* 2017; 176: 1307-1317.

3. Cadart M, De Sanctis L, Khirani S, *et al.* Parents of children referred to a sleep laboratory for disordered breathing reported anxiety, daytime sleepiness and poor sleep quality. *Acta Paediatrica* 2018; 107: 1253-1261.
4. Lynch MK, Elliott LC, Avis KT, *et al.* Quality of life in youth with obstructive sleep apnea syndrome (OSAS) treated with continuous positive airway pressure (CPAP) therapy. *Behav Sleep Med* 2019; 17: 238-245.
5. Redouane B, Cohen E, Stephens D, *et al.* Parental perceptions of quality of life in children on long-term ventilation at home as compared to enterostomy tubes. *PLoS One* 2016; 11: e0149999.
6. Meltzer LJ, Sanchez-Ortuno MJ, Edinger JD, *et al.* Sleep patterns, sleep instability, and health related quality of life in parents of ventilator-assisted children. *J Clin Sleep Med* 2015; 11: 251-258.
7. Young HK, Lowe A, Fitzgerald DA, *et al.* Outcome of noninvasive ventilation in children with neuromuscular disease. *Neurology* 2007; 68: 198-201.
8. Johannsen J, Fuhrmann L, Grolle B, *et al.* The impact of long-term ventilator-use on health-related quality of life and the mental health of children with neuromuscular diseases and their families: need for a revised perspective? *Health Qual Life Outcomes* 2020; 18: 219.
9. Baiardini I, Minetti C, Bonifacino S, *et al.* Quality of life in Duchenne muscular dystrophy: the subjective impact on children and parents. *J Child Neurol* 2011; 26: 707-713.
10. Noyes J. Comparison of ventilator-dependent child reports of health-related quality of life with parent reports and normative populations. *J Adv Nurs* 2007; 58: 1-10.
11. Vuillerot C, Hodgkinson I, Bissery A, *et al.* Self-perception of quality of life by adolescents with neuromuscular diseases. *J Adolesc Health* 2010; 46: 70-76.
12. Carnevale FA, Alexander E, Davis M, *et al.* Daily living with distress and enrichment: the moral experience of families with ventilator-assisted children at home. *Pediatrics International* 2006; 117: e48-e60.
