# Supplementary material
Source: HighWire-hosted journal article supplement (https://erj.ersjournals.com/content/59/6/2101404)
Supplement: inline-supplementary-material-23 [file inline-supplementary-material-23.pdf]

**Online Table S11:** Therapeutic education programs for CPAP and NIV.

| Author              | Country   | Journal                     | Type of study                                              | Number of patients              | Ages             | Therapeutic education program                                                                                                                                                                                                                                                                                                                                                                                                                                                                     | Evaluation, efficacy                                                                                                       |
|---------------------|-----------|-----------------------------|------------------------------------------------------------|---------------------------------|------------------|---------------------------------------------------------------------------------------------------------------------------------------------------------------------------------------------------------------------------------------------------------------------------------------------------------------------------------------------------------------------------------------------------------------------------------------------------------------------------------------------------|----------------------------------------------------------------------------------------------------------------------------|
| Hewitt-Taylor [1]   | UK        | Intensive Crit Care Nursing | Survey questionnaire, descriptive study on local practice  | 21/35 centers responded         | Not specified    | Areas that were seen as important for children with complex diseases requiring CPAP or NIV are discussed<br>Role of trained nurses<br>A variety of health care professionals are needed                                                                                                                                                                                                                                                                                                           |                                                                                                                            |
| Tibbals et al. [2]  | Australia | J Ped Child Health          | Longitudinal survey (1979-2008) in one center in Melbourne | 168 patients                    | 3 weeks – 19 yrs | Patients are considered early for discharge, condition must be stable, parents must be motivated.<br>Nurses and technologists teach the parents/carers in the PICU and the ward. Social workers act as case managers in the home. Parents are trained to cope with predictable instability at home. A full set of equipment for ventilation, suctioning and monitoring (SpO <sub>2</sub> ) with disposable items is provided. Children requiring 24-h ventilation have a spare ventilator at home | No information on eventual discharge failures                                                                              |
| Boroughs et al. [3] | USA       | Children                    |                                                            | 11 children with SMA, 6 on BPAP | 6 m-18 yrs       | Evaluation of caregiver skills via simulated scenario, corrections with re-evaluation after 3 and 6 m.                                                                                                                                                                                                                                                                                                                                                                                            | Training beneficial for all participants<br>Desire for real-life scenarios<br>Value of an on-going training for caregivers |
| Amaddeo et al. [4]  | France    | Pediatric Pulmonology       | Prospective study:                                         | 31 children                     | 0.8 - 17.5 yrs   | Description of the therapeutic education program and tools: educational boards and                                                                                                                                                                                                                                                                                                                                                                                                                | Compliance was excellent: mean                                                                                             |

|  |  |   |                                                 |  |  |                                                                                                 |                                                                                                                       |
|--|--|---|-------------------------------------------------|--|--|-------------------------------------------------------------------------------------------------|-----------------------------------------------------------------------------------------------------------------------|
|  |  | 1 | outpatient<br>program for<br>CPAP<br>initiation |  |  | cartoons, booklet, teddy bear, relaxation,<br>distraction, follow up at home, home visits, etc. | use 8h21/night<br>(5h45-12h20); %<br>of night with use<br>> 4h: $83 \pm 17\%$ ,<br>median nights<br>use/m: 25 (18-30) |
|--|--|---|-------------------------------------------------|--|--|-------------------------------------------------------------------------------------------------|-----------------------------------------------------------------------------------------------------------------------|

Abbreviations: m: months, yrs: years, BPAP: bilevel positive airway pressure, PICU: pediatric intensive care unit, SpO<sub>2</sub>: pulse oximetry, SMA: spinal muscular atrophy.

## References

1. Hewitt-Taylor J. Children who require long-term ventilation: staff education and training. *Intensive Crit Care Nurs* 2004; 20: 93-102.
2. Tibballs J, Henning R, Robertson CF, *et al.* A home respiratory support programme for children by parents and layperson carers. *J Paediatr Child Health* 2010; 46: 57-62.
3. Boroughs DS. An evaluation of a continuing education program for family caregivers of ventilator-dependent children with Spinal Muscular Atrophy (SMA). *Children (Basel)* 2017; 4: 33.
4. Amaddeo A, Frapin A, Touil S, *et al.* Outpatient initiation of long-term continuous positive airway pressure in children. *Pediatr Pulmonol* 2018; 53: 1422-1428.
