# Supplementary material
Source: HighWire-hosted journal article supplement (https://erj.ersjournals.com/content/59/6/2101404)
Supplement: inline-supplementary-material-24 [file inline-supplementary-material-24.pdf]

**Online Table S12: Transition**

| Author                    | Country      | Journal              | Type of study                                     | Number of patients                       | Ages             | Transition                                                                                                                                                                                                                                                                                                                  | Transition program |
|---------------------------|--------------|----------------------|---------------------------------------------------|------------------------------------------|------------------|-----------------------------------------------------------------------------------------------------------------------------------------------------------------------------------------------------------------------------------------------------------------------------------------------------------------------------|--------------------|
| Tibbals et al. [1]        | Australia    | J Ped Child Health   | Longitudinal (1979-2008) in 1 center in Melbourne | 168 children                             | 3 weeks - 19 yrs | 58 CPAP, 50 BPAP, 48 tracheotomy, 5 phrenic nerve, 4 negative pressure, 3 nasopharyngeal tube<br>27 (16%) were transferred to adult services (no more information)                                                                                                                                                          |                    |
| McDougall et al. [2]      | Canada       | Arch Dis Child       | Retrospective study in 1 center 1995-2009         | 144 children (116 on NIV)                | < 18 yrs         | 37/144 (26%) children (5 IV + 32 NIV) transitioned to adult services (increase over time) median age of transition 18 yrs (16.4-19.3)                                                                                                                                                                                       | ?                  |
| Amin et al. [3]           | Canada, 2014 | Pediatr Pulmonol     | Retrospective study in 1 center 1991-2011         | 313 children treated with NIV            | 2.9 - 13.9 yrs   | 106 transitioned to an adult service (of 379 IV and NIV)                                                                                                                                                                                                                                                                    | ?                  |
| Chatwin et al. [4]        | UK           | Plos One             | Retrospective study in 1 center 1993-2011         | 496 children                             | < 17 yrs         | 181 (40%) transitioned to adult services                                                                                                                                                                                                                                                                                    | ?                  |
| Dale et al. [5]           | Canada       | Pediatr Child Health | Semi-structured telephone interview               | 14 adolescents with NMD treated with NIV | 17-21 yrs        | Facilitators: early planning, written information material, joint pediatric-adult provider-family transition meetings<br>Barriers: insufficient information, limited access to nursing and allied health providers, reduced funding or health services<br>More difficulties if cognitive dysfunction or physical dependence |                    |
| Chau et al. [6]           | Hong Kong    | Respir Care          | Retrospective study in 1 center 1997-2015         | 71 children treated with NIV             | < 21 yrs         | 7/71 (10%) patients with NIV transitioned to adult services or other services because of geographical reasons                                                                                                                                                                                                               | ?                  |
| Castro-Codesal et al. [7] | Canada       | Plos One             | Retrospective study in Alberta 2005-2014          | 622 children                             | 0-18 yrs         | Increase in the number of children transitioned over time: median 4 (5-19)/yr between 2011-2014                                                                                                                                                                                                                             | ?                  |

|                   |            |                   |                                                           |                                   |                     |                                                                                                                                                                                                                                                                                                                                                                  |                                                  |
|-------------------|------------|-------------------|-----------------------------------------------------------|-----------------------------------|---------------------|------------------------------------------------------------------------------------------------------------------------------------------------------------------------------------------------------------------------------------------------------------------------------------------------------------------------------------------------------------------|--------------------------------------------------|
| Ikeda et al. [8]  | Japan      | Brain Dev         | Retrospective study in 1 center 2015-2015                 | 53 children                       |                     | 10 children transitioned to adult services (29% of the 34 continuing patients)                                                                                                                                                                                                                                                                                   | ?                                                |
| Onofri et al. [9] | Italy + UK | Italian J Pediatr | Retrospective study, comparison Brompton/Babin o Gesu     | Patients with NMD on NIV: 15 + 15 | Ado > 15 yrs        | Patients transitioned at a younger age in the Brompton<br>Brompton has an adult unit in same hospital<br>Care similar<br>No analysis of quality of life.                                                                                                                                                                                                         | Brompton has a transition program but not B Gesu |
| Dale et al. [10]  | Canada     | Pediatr Pulmonol  | Prospective longitudinal interview of ado-caregiver dyads | 18 ado 17-19 yrs                  | 10 treated with NIV | Facilitators: early transition discussion, opportunity for patients to speak directly with home care providers, printed information about adult services, joint pediatric-adult team handover meeting<br>Modifiable barriers: lack of other specialist referrals, insufficient information about homecare service funding, limited involvement of family doctors |                                                  |
| Leske et al. [11] | Argentina  | Pediatr Pulmonol  | Retrospective study in 1 center 2007-2018                 | 244 children (210 NIV)            |                     | 40/244 (16%) transitioned to adult services                                                                                                                                                                                                                                                                                                                      | ?                                                |

Abbreviations: m: months, yrs: years, CPAP: continuous positive airway pressure, BPAP: bilevel positive airway pressure, NIV: noninvasive ventilation, IV: invasive ventilation.

## References

1. Tibballs J, Henning R, Robertson CF, *et al.* A home respiratory support programme for children by parents and layperson carers. *J Paediatr Child Health* 2010; 46: 57-62.
2. McDougall CM, Adderley RJ, Wensley DF, *et al.* Long-term ventilation in children: longitudinal trends and outcomes. *Arch Dis Child* 2013; 98: 660-665.

3. Amin R, Sayal P, Syed F, *et al.* Pediatric long-term home mechanical ventilation: twenty years of follow-up from one Canadian center. *Pediatr Pulmonol* 2014; 49: 816-824.
4. Chatwin M, Tan HL, Bush A, *et al.* Long term non-invasive ventilation in children: impact on survival and transition to adult care. *PLoS One* 2015; 10: e0125839.
5. Dale CM, King J, Amin R, *et al.* Health transition experiences of Canadian ventilator-assisted adolescents and their family caregivers: A qualitative interview study. *Paediatr Child Health* 2017; 22: 277-281.
6. Chau SK, Yung AW, Lee SL. Long-term management for ventilator-assisted children in Hong Kong: 2 decades' experience. *Respir Care* 2017; 62: 54-64.
7. Castro-Codesal ML, Dehaan K, Bedi PK, *et al.* Longitudinal changes in clinical characteristics and outcomes for children using long-term non-invasive ventilation. *PLoS One* 2018; 13: e0192111.
8. Ikeda A, Tsuji M, Goto T, *et al.* Long-term home non-invasive positive pressure ventilation in children: Results from a single center in Japan. *Brain Dev* 2018; 40: 558-565.
9. Onofri A, Tan HL, Cherchi C, *et al.* Transition to adult care in young people with neuromuscular disease on non-invasive ventilation. *Ital J Pediatr* 2019; 45: 90.
10. Dale CM, Carbone S, Amin R, *et al.* A transition program to adult health services for teenagers receiving long-term home mechanical ventilation: A longitudinal qualitative study. *Pediatr Pulmonol* 2020; 55: 771-779.
11. Leske V, Guerdile MJ, Gonzalez A, *et al.* Feasibility of a pediatric long-term home ventilation program in Argentina: 11 years' experience. *Pediatr Pulmonol* 2020; 55: 780-787.
