# Supplementary material
Source: HighWire-hosted journal article supplement (https://erj.ersjournals.com/content/59/6/2101404)
Supplement: inline-supplementary-material-25 [file inline-supplementary-material-25.pdf]

**Online Table S13.** Cost and resource use of CPAP or NIV.

| Author             | Country    | Journal            | Type of study                                                | Number of patients                         | Ages                   | Cost and resources                                                                                                                                                                                                                                                                                                                                                                                                                                                                   |
|--------------------|------------|--------------------|--------------------------------------------------------------|--------------------------------------------|------------------------|--------------------------------------------------------------------------------------------------------------------------------------------------------------------------------------------------------------------------------------------------------------------------------------------------------------------------------------------------------------------------------------------------------------------------------------------------------------------------------------|
| Oktem et al. [1]   | Turkey     | Respirati on       | Longitudinal study in one center in Istanbul (2001-2006)     | 34 children, 23 on NIV                     | 4 m -17 yrs            | No information on the investigations that led to the prescription of NIV nor on health insurance<br>Patients spent a median of 32 (3 - 270) days in hospital before discharge due to the delay in supplying home equipment<br>Ventilator failure seen in 2 patients (NIV or IV ?) without any serious complication                                                                                                                                                                   |
| Tibbals et al. [2] | Australi a | J Ped Child Health | Longitudinal (1979-2008) in one center (Melbourne)           | 168 children                               | 3 weeks - 19 yrs       | 58 CPAP, 50 BPAP, 48 tracheotomy + other<br>Median annual cost of all care of a patient at home: 115 300 AUS dollar (range 82 000 - 200 000), no distinction IV-NIV                                                                                                                                                                                                                                                                                                                  |
| Nathan et al. [3]  | Malaysi a  | Pediatr Pulmonol   | Longitudinal study in one center (2001-2014)                 | 70 patients, 60 on NIV (30 CPAP + 30 BPAP) | 1.1 - 11 yrs (for NIV) | No information on the investigations that led to the prescription of NIV<br>Lack of health insurance for children on NIV<br>Equipment bought by family 24 (83%), or sponsor 5 (17%), borrowed 41 (57%) by medical social worker (35 (85%) or other source 6 (15%)                                                                                                                                                                                                                    |
| Leske et al. [4]   | Argenti na | Pediatr Pulmonol   | Longitudinal study in one center in Buenos Aires (2007-2018) | 244 children                               | 3 - 14 yrs             | Home ventilation (IV + NIV) possible in a low-income country, 210/244 (86%) used NIV, 84% had health insurance<br>173/244 (71%) had sleep studies, 147/173 (91%) PSG, and 13/173 (7.5%) nocturnal SpO <sub>2</sub> + PtcCO <sub>2</sub> , and 2 diurnal ABG + nocturnal SpO <sub>2</sub><br>> 50% of patients lived > 100 km and 34% > 500 km from NIV center<br>NIV was started electively in 116/244 (47.5%) patients, subacutely in 80/244 (32.8%) and acutely in 48/244 (19.7%). |

Abbreviations: m: months, yrs: years, CPAP: continuous positive airway pressure, BPAP: bilevel positive airway pressure, NIV: noninvasive ventilation, IV: invasive ventilation, AUS: Australian dollar, PSG: polysomnography, SpO<sub>2</sub>: pulse oximetry, PtcCO<sub>2</sub>: transcutaneous carbon dioxide pressure, ABG: arterial blood gases.

## References

1. Oktem S, Ersu R, Uyan ZS, *et al.* Home ventilation for children with chronic respiratory failure in Istanbul. *Respiration* 2008; 76: 76-81.
2. Tibballs J, Henning R, Robertson CF, *et al.* A home respiratory support programme for children by parents and layperson carers. *J Paediatr Child Health* 2010; 46: 57-62.
3. Nathan AM, Loo HY, de Bruyne JA, *et al.* Thirteen years of invasive and noninvasive home ventilation for children in a developing country: A retrospective study. *Pediatr Pulmonol* 2017; 52: 500-507.
4. Leske V, Guerdile MJ, Gonzalez A, *et al.* Feasibility of a pediatric long-term home ventilation program in Argentina: 11 years' experience. *Pediatr Pulmonol* 2020; 55: 780-787.
